# Supplementary material
Source: PubMed Central journal article supplement (PMC8278354)
Supplement: npab013_suppl_supplementary_materials_1.pdf [file npab013_suppl_supplementary_materials_1.pdf]

**Supplementary materials ‘Systematic review on the use of patient-reported outcome measures in brain tumor studies: part of the Response Assessment in Neuro-Oncology Patient Reported Outcome (RANO-PRO) initiative’**

**Supplementary Figure 1. Flow diagram (PRISMA) of the study selection process.**

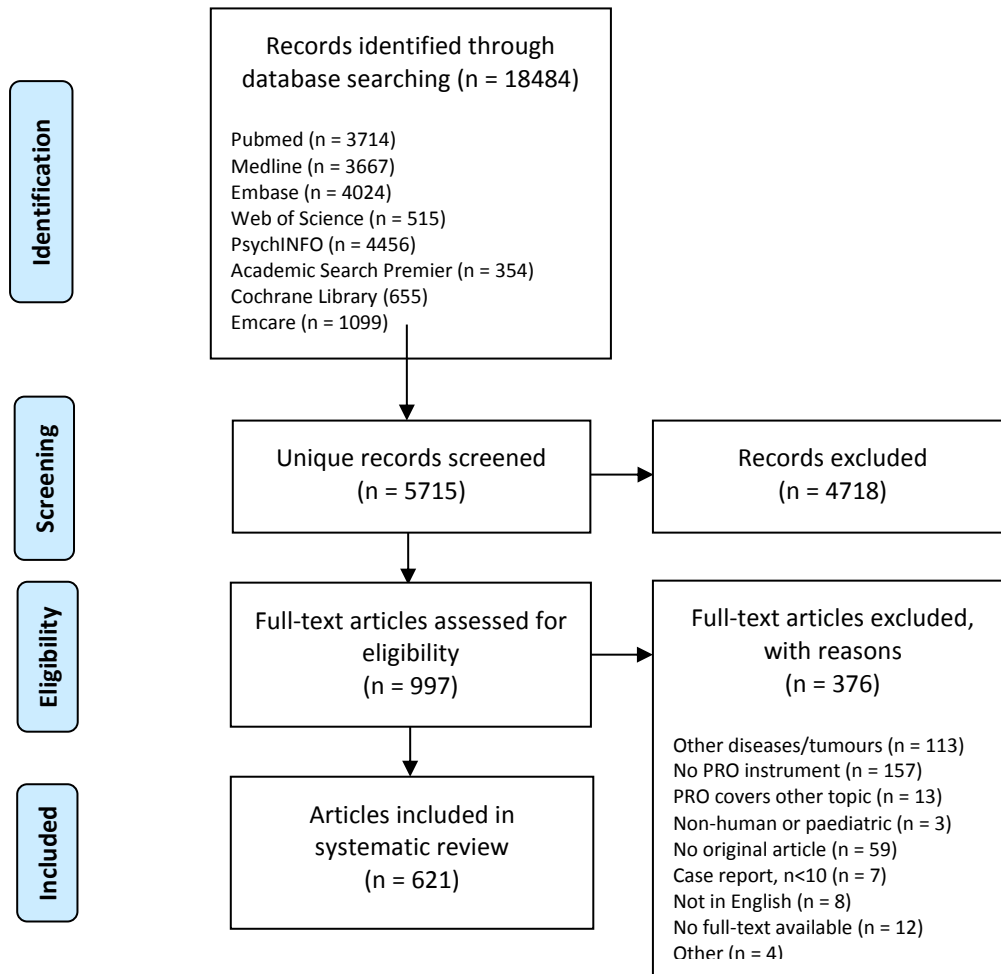

**Supplementary Figure 2. Flow diagram (PRISMA) of the study selection process of studies registered at clinicaltrials.gov.**

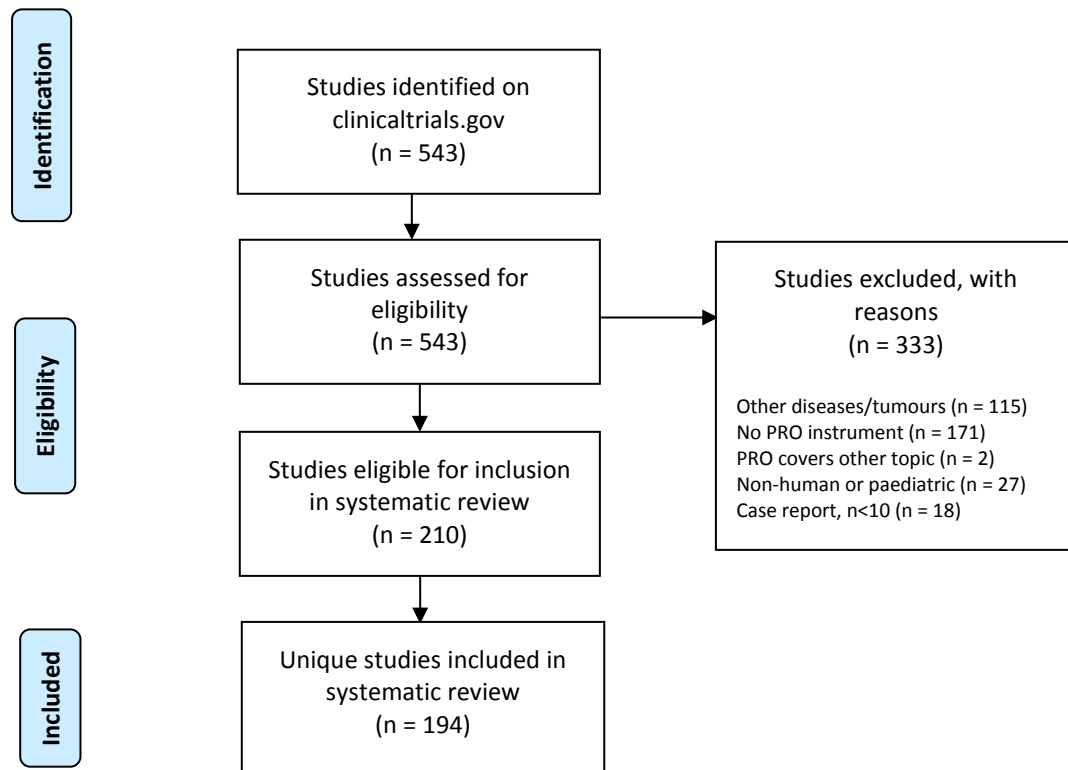

**Supplementary table 1. Characteristics of all identified eligible PRO measures.**

| Abbreviation       | Full name                                                                                                        | # used in studies published | # used in unpublished studies | Population of intended use | # of items | Subscales                                                                                                                                                                                                                                      | Study type in which used      |
|--------------------|------------------------------------------------------------------------------------------------------------------|-----------------------------|-------------------------------|----------------------------|------------|------------------------------------------------------------------------------------------------------------------------------------------------------------------------------------------------------------------------------------------------|-------------------------------|
| EORTC-QLQ-C30(+3)  | European Organisation for Research and Treatment of Cancer - Quality of Life Questionnaire - Core 30(+3)         | 186                         | 100                           | Cancer specific            | 30(+3)     | 5 functional scales (physical; role; emotional; cognitive; social); 3 symptom scales (fatigue; nausea and vomiting; pain); 7 single items (dyspnea; insomnia; appetite loss, constipation; diarrhea; financial difficulties) and GHS/QoL scale | Interventional; observational |
| EORTC-QLQ-BN20(+2) | European Organisation for Research and Treatment of Cancer - Quality of Life Questionnaire - Brain Cancer 20(+2) | 164                         | 83                            | Brain tumor specific       | 20(+2)     | 4 (future uncertainty; visual disorder; motor dysfunction; communication deficit); 7 single items (headache; seizures; drowsiness; hair loss; itchy skin; weakness of legs; bladder control)                                                   | Interventional; observational |
| FACT-Br            | Functional Assessment of Cancer Therapy- Brain                                                                   | 121                         | 46                            | Brain tumor specific       | 50         | 5 (physical-; social/family-; emotional-; functional well-being; disease specific concerns)                                                                                                                                                    | Interventional; observational |
| HADS               | The Hospital Anxiety and Depression scale                                                                        | 62                          | 8                             | Generic                    | 14         | 2 (anxiety symptoms; depression symptoms)                                                                                                                                                                                                      | Interventional; observational |
| SF-36              | Short Form 36 Health Survey / RAND-36 / Medical Outcome Study                                                    | 47                          | 5                             | Generic                    | 36         | 8 (physical functioning; physical role; pain; general health; vitality; social function; emotional role; mental health)                                                                                                                        | Interventional; observational |

|                   |                                                                                                                        |    |    |                      |      |                                                                                                                                          |                               |
|-------------------|------------------------------------------------------------------------------------------------------------------------|----|----|----------------------|------|------------------------------------------------------------------------------------------------------------------------------------------|-------------------------------|
| MDASI-BT          | MD Anderson Symptom Inventory Brain Tumor                                                                              | 25 | 24 | Brain tumor specific | 28   | 6 factors (affective, cognitive, neurologic, constitutional, gastrointestinal and interference)                                          | Interventional; observational |
| BDI(-II)          | Beck Depression Inventory (-II)                                                                                        | 38 | 9  | Generic              | 21   | BDI: 3 (negative attitude towards self; performance impairment; somatic symptoms); BDI-II: 2 (affective; somatic)                        | Interventional; observational |
| EQ-5D             | EuroQoL 5 dimensions; 3 or 5 levels                                                                                    | 36 | 12 | Generic              | 6    | 5 (mobility; self-care; usual activities; pain/discomfort; anxiety/depression)                                                           | Interventional; observational |
| DT(+PL)           | NCCN Distress Thermometer (and Problem List)                                                                           | 28 | 2  | Cancer specific      | 1+39 | 6 (overall distress; spiritual/religious concerns; practical-; family-; emotional-; physical problems)                                   | Interventional; observational |
| FACIT-F           | Functional Assessment of Chronic Illness Therapy-Fatigue                                                               | 19 | 5  | Other indications    | 13   | 1 (disease specific concerns)                                                                                                            | Interventional; observational |
| STAI-Y            | State-Trait Anxiety Inventory Form Y                                                                                   | 19 | 1  | Generic              | 40   | 2 (trait anxiety; state anxiety)                                                                                                         | Interventional; observational |
| EORTC-QLQ-C15-PAL | European Organisation for Research and Treatment of Cancer - Quality of Life Questionnaire - Core 15 - Palliative Care | 15 | 5  | Cancer specific      | 15   | 10 (GHS; physical functioning; emotional functioning; fatigue; nausea/vomiting; pain; dyspnea; insomnia; appetite loss and constipation) | Interventional; observational |
| MOS CFS           | Medical Outcomes Study Cognitive Functioning Scale                                                                     | 15 |    | Generic              | 6    | 1 (cognitive function)                                                                                                                   | Interventional; observational |

|            |                                                              |    |   |                   |    |                                                                                                                                                    |                               |
|------------|--------------------------------------------------------------|----|---|-------------------|----|----------------------------------------------------------------------------------------------------------------------------------------------------|-------------------------------|
| BFI        | Brief Fatigue Inventory                                      | 7  | 6 | Cancer specific   | 9  | 2 (severity of fatigue; impact on daily function)                                                                                                  | Interventional; observational |
| FACT-cog   | Functional Assessment of Cancer Therapy- Cognitive Function  | 3  | 9 | Cancer specific   | 37 | 4 (perceived cognitive impairments; comments from others; perceived cognitive abilities; impact on QoL)                                            | Interventional; observational |
| FACT-G     | Functional Assessment of Cancer Therapy- General             | 9  | 2 | Cancer specific   | 27 | 4 (physical-; social/family-; emotional-; functional well-being)                                                                                   | Interventional; observational |
| ZSDS       | Zung Self-Rating Depression Scale                            | 10 | 1 | Other indications | 20 | 1 (depressive symptoms)                                                                                                                            | Interventional; observational |
| BAI        | Beck Anxiety Inventory                                       | 6  | 4 | Generic           | 21 | 1 (anxiety symptoms)                                                                                                                               | Interventional; observational |
| QOLIE-31-P | Patient Weighted Quality of Life in Epilepsy                 | 10 |   | Other indications | 39 | 7 (emotional well-being; social function; energy/fatigue; cognitive functioning; seizure worry; medication effects; overall QoL) and health status | Interventional; observational |
| SQLI       | Spitzer Quality of Life Index                                | 10 |   | Cancer specific   | 5  | 5 (activity; daily living; health; support; outlook)                                                                                               | Interventional; observational |
| AEP        | Adverse Events Profile                                       | 9  |   | Other indications | 19 | 1 (AED adverse effects)                                                                                                                            | Interventional; observational |
| CES-D-20   | Center for Epidemiologic Studies Depression Scale - 20 items | 8  | 1 | Generic           | 20 | 4 (somatic-retarded activity; depressed-; positive-; interpersonal affect)                                                                         | Interventional; observational |
| MFI        | Multidimensional Fatigue Inventory                           | 6  | 3 | Cancer specific   | 20 | 5 (general-; physical-; mental fatigue; reduced motivation; reduced activity)                                                                      | Interventional; observational |

|         |                                               |   |   |                   |    |                                                                                                                                                |                               |
|---------|-----------------------------------------------|---|---|-------------------|----|------------------------------------------------------------------------------------------------------------------------------------------------|-------------------------------|
| PHQ-9   | Patient Health Questionnaire 9-item           | 8 | 1 | Generic           | 9  | 1 (depressive symptoms)                                                                                                                        | Interventional; observational |
| CFQ     | Cognitive Failures Questionnaire              | 8 |   | Generic           | 25 | 4 (memory; distractibility; (social) blunders; (memory for) names)                                                                             | Interventional; observational |
| POMS-SF | Profile of Mood States - Short Form           | 8 |   | Generic           | 37 | 6 (depression; anger; tension; confusion; fatigue; vigor)                                                                                      | Interventional; observational |
| PSQI    | Pittsburgh Sleep Quality Index                | 2 | 6 | Generic           | 19 | 7 (subjective sleep quality, sleep latency, sleep duration, sleep efficiency, sleep disturbance, use of sleep medication, daytime dysfunction) | Interventional; observational |
| PSS-10  | Perceived Stress Scale 10-item                | 6 | 1 | Generic           | 10 | 2 (perceived helplessness; perceived self-efficacy)                                                                                            | Interventional; observational |
| ESS     | Epworth Sleepiness Scale                      | 2 | 4 | Generic           | 8  | 1 (daytime sleepiness)                                                                                                                         | Interventional; observational |
| POMS    | Profile of Mood States                        | 6 |   | Generic           | 65 | 6 (depression; anger; tension; confusion; fatigue; vigor)                                                                                      | Interventional; observational |
| BASIQ   | Brain Symptom and Impact Questionnaire        | 5 |   | CNS disorder      | 18 | 2 (symptoms; interferences)                                                                                                                    | Observational                 |
| FACT-L  | Functional Assessment of Cancer Therapy- Lung | 2 | 3 | Other indications | 36 | 5 (physical-; social/family-; emotional-; functional well-being; disease specific concerns)                                                    | Interventional; observational |
| FLIC    | Functional Living Index Cancer                | 5 |   | Cancer specific   | 22 | 5 (physical well-being and ability; emotional state; sociability; family situation; nausea)                                                    | Observational                 |
| FrSBe   | Frontal Systems Behavior Scale                | 4 | 1 | CNS disorder      | 46 | 3 (apathy; disinhibition; executive dysfunction)                                                                                               | Interventional; observational |

|                |                                                                                                             |   |   |                      |    |                                                                                                                                                                                     |                               |
|----------------|-------------------------------------------------------------------------------------------------------------|---|---|----------------------|----|-------------------------------------------------------------------------------------------------------------------------------------------------------------------------------------|-------------------------------|
| FSS            | Fatigue Severity Scale                                                                                      | 3 | 2 | Other indications    | 9  | 1 (severity of fatigue symptoms)                                                                                                                                                    | Interventional; observational |
| IES-R          | Impact of Events Scale-Revised                                                                              | 5 |   | Other indications    | 22 | 3 (intrusion; avoidance; hyperarousal)                                                                                                                                              | Observational                 |
| Osoba NV5      | Osoba Nausea and Vomiting Module                                                                            | 4 | 1 | Cancer specific      | 10 | 2 (nausea/emesis; retching)                                                                                                                                                         | Interventional                |
| SNAS           | Sherbrooke Neuro-oncology Assessment Scale                                                                  | 4 | 1 | Brain tumor specific | 30 | 7 (functional well-being; symptom severity/fear of death; social support/acceptance of disease; autonomy in personal care; digestive symptomatology; neurocognitive function; pain) | Interventional; observational |
| 1-item LASA    | 1-item Linear Analog Self-Assessment                                                                        | 2 | 2 | Generic              | 1  | 1 (overall QoL)                                                                                                                                                                     | Interventional                |
| BRIEF-A        | Behavior Rating Inventory of Executive Function - Adult Version                                             | 3 | 1 | CNS disorder         | 75 | 9 (inhibit; self-monitor; plan/organize; shift; initiate; task monitor; emotional control; working memory; organization of materials)                                               | Interventional; observational |
| CIS            | Checklist Individual Strength                                                                               | 4 |   | Generic              | 20 | 4 (subjective fatigue; concentration, motivation; physical activity)                                                                                                                | Interventional; observational |
| EORTC-QLQ-LC13 | European Organisation for Research and Treatment of Cancer - Quality of Life Questionnaire - Lung Cancer 13 | 3 | 1 | Other indications    | 13 | 10 (dyspnea; coughing; hemoptysis; sore mouth; dysphagia; peripheral neuropathy; alopecia; pain in chest; pain in arm or shoulder; pain in other parts)                             | Interventional; observational |

|          |                                                               |   |   |                      |    |                                                                                                                                                   |                               |
|----------|---------------------------------------------------------------|---|---|----------------------|----|---------------------------------------------------------------------------------------------------------------------------------------------------|-------------------------------|
| FACT-B   | Functional Assessment of Cancer Therapy- Breast               | 3 | 1 | Other indications    | 37 | 5 (physical-; social/family-; emotional-; functional well-being; disease specific concerns)                                                       | Interventional                |
| FBrSI-15 | FACT Brain Symptom Index - 15                                 | 3 | 1 | Brain tumor specific | 15 | 1 (disease specific concerns)                                                                                                                     | Interventional                |
| IIRS     | Illness Intrusiveness Ratings                                 | 3 | 1 | Other indications    | 13 | 5 (physical well-being and diet; work and finances; marital, sexual and family relations; recreation and social relations; other aspects of life) | Interventional; observational |
| MSAS     | Memorial Symptom Assessment Scale                             | 4 |   | Cancer specific      | 32 | 3 (physical-; psychological symptoms; global distress)                                                                                            | Observational                 |
| PANAS    | Positive and Negative Affect Schedule                         | 3 | 1 | Generic              | 20 | 2 (positive affect; negative affect)                                                                                                              | Interventional; observational |
| PDI      | Psychological Distress Inventory                              | 4 |   | Cancer specific      | 13 | 1 (psychological distress)                                                                                                                        | Interventional; observational |
| SF-12    | Short Form 12 Health Survey / RAND-12 / Medical Outcome study | 4 |   | Generic              | 12 | 8 (physical functioning; physical role; pain; general health; vitality; social function; emotional role; mental health).                          | Observational                 |
| CES-D-10 | Center for Epidemiologic Studies Depression Scale - 10 items  | 3 |   | Generic              | 10 | 3 (somatic-retarded activity; depressed affect; positive affect)                                                                                  | Observational                 |
| CFS      | Cancer Fatigue Scale                                          | 1 | 2 | Cancer specific      | 15 | 3 (physical; affective; cognitive)                                                                                                                | Interventional                |
| CIQ      | Community Integration Questionnaire                           | 3 |   | CNS disorder         | 15 | 3 (home integration; social integration; productivity)                                                                                            | Interventional; observational |



|                |                                                                                                               |   |   |                   |    |                                                                                                                                                            |                               |
|----------------|---------------------------------------------------------------------------------------------------------------|---|---|-------------------|----|------------------------------------------------------------------------------------------------------------------------------------------------------------|-------------------------------|
| DASS-21        | Depression Anxiety Stress Scale Short Form                                                                    | 3 |   | Generic           | 21 | 3 (depression; anxiety; stress)                                                                                                                            | Interventional; observational |
| EORTC-QLQ-BR23 | European Organisation for Research and Treatment of Cancer - Quality of Life Questionnaire - Breast Cancer 23 | 1 | 2 | Other indications | 23 | 8 (body image; sexual functioning; sexual enjoyment; future perspective; systemic therapy side effects; breast symptoms; arm symptoms; upset by hair loss) | Interventional                |
| ESAS-r         | Edmonton Symptom Assessment System-Revised                                                                    | 1 | 2 | Cancer specific   | 9  | 1 (symptom severity)                                                                                                                                       | Interventional; observational |
| FPQLI-C        | Ferrans and Powers Quality of Life Index - Cancer version                                                     | 3 |   | Cancer specific   | 66 | 4 (health and functioning; psychological/spiritual; social and economic; family) and overall QoL                                                           | Observational                 |
| GAD-7          | Generalized Anxiety Disorder 7-item                                                                           | 2 | 1 | Generic           | 7  | 1 (anxiety symptoms)                                                                                                                                       | Observational                 |
| MAT            | MASCC (Multinational Association of Supportive Care in Cancer) Antiemesis Tool                                | 1 | 2 | Cancer specific   | 8  | 4 (acute vomiting; acute nausea; delayed vomiting; delayed nausea)                                                                                         | Interventional                |
| MQOLQ          | McGill Quality of Life Questionnaire                                                                          | 3 |   | Other indications | 17 | 5 (physical well-being; physical symptoms; psychological; existential; support)                                                                            | Interventional; observational |
| NHP            | Nottingham Health Profile                                                                                     | 3 |   | Generic           | 45 | 7 (energy level; pain; emotional reaction; sleep; social isolation; physical abilities; life areas affected)                                               | Observational                 |

|             |                                                             |   |   |                   |    |                                                                                                                                                                                     |                               |
|-------------|-------------------------------------------------------------|---|---|-------------------|----|-------------------------------------------------------------------------------------------------------------------------------------------------------------------------------------|-------------------------------|
| POS         | Palliative care Outcome Scale                               | 3 |   | Other indications | 10 | 5 (physical; emotional; psychological; spiritual; provision of information and support)                                                                                             | Observational                 |
| PTGI        | Post-Traumatic Growth Inventory                             | 3 |   | Other indications | 21 | 5 (relating to others; new possibilities; personal strength; spiritual change; appreciation of life)                                                                                | Observational                 |
| SCL-90      | Symptom CheckList - 90                                      | 2 | 1 | Generic           | 90 | 9 (somatization; obsessive-compulsive; interpersonal sensitivity; depression; anxiety; hostility; phobic anxiety; paranoid ideation; psychoticism)                                  | Interventional; observational |
| SF-8        | Short Form 8 Health Survey / RAND-8 / Medical Outcome study | 3 |   | Generic           | 8  | 8 (physical functioning; physical role; pain; general health; vitality; social function; emotional role; mental health)                                                             | Observational                 |
| WHOQOL-BREF | World Health Organization Quality of Life - BREF            | 3 |   | Generic           | 26 | 4 (physical health; psychological; social relationships; environment) and overall QoL and GHS                                                                                       | Interventional; observational |
| ABS         | Bradburn Affect Balance Scale                               | 2 |   | Generic           | 10 | 2 (positive affect; negative affect)                                                                                                                                                | Observational                 |
| ASBQ        | Anterior Skull Base Questionnaire                           | 2 |   | Other indications | 35 | 5 (physical function; vitality; pain; influence of emotion; specific symptoms)                                                                                                      | Observational                 |
| CIPI        | Chronic Illness Problem Inventory                           | 2 |   | Other indications | 65 | 19 (sleep; eating; finances; employment; medications; cognitive; physical appearance; body deterioration; sex; ADL; inactivity; social activity; family/friends contact; assertion; | Observational                 |

|                |                                                                                                                        |   |   |                   |    |                                                                                                           |                               |
|----------------|------------------------------------------------------------------------------------------------------------------------|---|---|-------------------|----|-----------------------------------------------------------------------------------------------------------|-------------------------------|
|                |                                                                                                                        |   |   |                   |    | medical interaction; marital difficulty; marital overprotection; nonmarried relationships; illness focus) |                               |
| DASS-42        | Depression Anxiety Stress Scale                                                                                        | 2 |   | Generic           | 42 | 3 (depression; anxiety; stress)                                                                           | Observational                 |
| DSQ-C          | Dexamethasone Symptom Questionnaire - Chronic                                                                          | 1 | 1 | Cancer specific   | 17 | 4 (affective; appetite; dermatologic; indigestion)                                                        | Observational                 |
| EORTC-QLQ-FA12 | European Organisation for Research and Treatment of Cancer - Quality of Life Questionnaire - Cancer Related Fatigue 12 | 1 | 1 | Cancer specific   | 12 | 3 (physical; cognitive; emotional)                                                                        | Interventional; observational |
| FACIT-SP-12    | Functional Assessment of Chronic Illness Therapy - Spiritual Well-Being - 12                                           | 1 | 1 | Other indications | 12 | 1 (spiritual well-being)                                                                                  | Interventional; observational |
| GDS            | Geriatric Depression Scale                                                                                             | 2 |   | Other indications | 30 | 1 (depression)                                                                                            | Observational                 |
| HUI-15Q        | Health Utility Index - 15 item Questionnaire                                                                           | 2 |   | Generic           | 15 | 9 (vision; hearing; speech; ambulation/mobility; pain; dexterity; self-care; emotion; cognition)          | Observational                 |
| ISI            | Insomnia Severity Index                                                                                                | 1 | 1 | Other indications | 7  | 1 (sleep problems)                                                                                        | Interventional; observational |

|                                              |                                                                                                   |   |   |                      |    |                                                                                                                                                                           |                               |
|----------------------------------------------|---------------------------------------------------------------------------------------------------|---|---|----------------------|----|---------------------------------------------------------------------------------------------------------------------------------------------------------------------------|-------------------------------|
| M-FLIE                                       | Modified Functional Living Index-Emesis                                                           | 2 |   | Cancer specific      | 18 | 2 (nausea; vomiting)                                                                                                                                                      | Interventional                |
| MFSI-SF                                      | Multidimensional Fatigue Symptom Inventory Short form                                             | 2 |   | Generic              | 30 | 5 (general; physical; emotional; mental; vigor)                                                                                                                           | Observational                 |
| NFBrSI-24                                    | NCCN-FACT-Brain Symptom Index - 24                                                                | 1 | 1 | Brain tumor specific | 24 | 1 (disease specific concerns)                                                                                                                                             | Interventional; observational |
| NTUIS-Self                                   | National Taiwan University Irritability Scale-Self                                                |   | 2 | CNS disorder         | 18 | 2 (verbal aggression; annoyance)                                                                                                                                          | Observational                 |
| PAIS-SR                                      | Psychosocial Adjustment to Illness Scale - Self Report                                            | 2 |   | Other indications    | 46 | 7 (healthcare orientation; vocational environment; domestic environment; sexual relationships; extended family relationships; social environment; psychological distress) | Observational                 |
| PCL-C                                        | PTSD Checklist-Civilian Version                                                                   | 2 |   | Generic              | 17 | 1 (PTSD symptoms)                                                                                                                                                         | Interventional; observational |
| POMS-SF-32                                   | Profile of Mood States - Short Form - 32                                                          | 2 |   | Generic              | 32 | 5 (depression; anger; fatigue; tension; vigor)                                                                                                                            | Observational                 |
| PRO-CTCAE-Anxiety                            | Patient-Reported Outcomes version of the Common Terminology Criteria for Adverse Events - Anxiety |   | 2 | Cancer specific      | 3  | 1 (anxiety)                                                                                                                                                               | Interventional                |
| PROMIS AbilityParticinSocRoles andActivities | Patient-Reported Outcomes Measurement Information System -                                        | 2 |   | Generic              | 35 | 1 (ability to participate in social roles and activities)                                                                                                                 | Observational                 |

|                          |                                                                              |   |  |         |     |                                                                                                    |                               |
|--------------------------|------------------------------------------------------------------------------|---|--|---------|-----|----------------------------------------------------------------------------------------------------|-------------------------------|
|                          | Ability to Participate in Social Roles and Activities                        |   |  |         |     |                                                                                                    |                               |
| PROMIS Anxiety           | Patient-Reported Outcomes Measurement Information System - Anxiety           | 2 |  | Generic | 29  | 4 (fear; anxious misery; hyperarousal; somatic symptoms related to arousal)                        | Observational                 |
| PROMIS Depression        | Patient-Reported Outcomes Measurement Information System - Depression        | 2 |  | Generic | 28  | 4 (negative mood; views of self; social cognition; decreased positive affect and engagement)       | Interventional; observational |
| PROMIS Pain Interference | Patient-Reported Outcomes Measurement Information System - Pain Interference | 2 |  | Generic | 40  | 5 (pain hinders engagement in social-; cognitive-; emotional-; physical-; recreational activities) | Observational                 |
| PROMIS Physical Function | Patient-Reported Outcomes Measurement Information System - Physical Function | 2 |  | Generic | 165 | 4 (functioning of upper extremities; lower extremities; central regions; IADL)                     | Observational                 |
| PROMIS Sleep Disturbance | Patient-Reported Outcomes Measurement Information System - Sleep Disturbance | 2 |  | Generic | 27  | 3 (sleep quality; sleep depth; restoration associated with sleep)                                  | Observational                 |

|                         |                                                                                       |   |   |                      |    |                                                                                                                                                                   |                               |
|-------------------------|---------------------------------------------------------------------------------------|---|---|----------------------|----|-------------------------------------------------------------------------------------------------------------------------------------------------------------------|-------------------------------|
| PROMIS-Pain Behavior SF | Patient-Reported Outcomes Measurement Information System - Pain Behavior - Short Form | 2 |   | Generic              | 7  | 3 (observable displays; pain severity behaviors; verbal reports of pain)                                                                                          | Interventional; observational |
| RSC(-ALS)               | Rotterdam Symptom Checklist (-Activity Level Scale)                                   | 2 |   | Generic              | 8  | 1 (activity level scale)                                                                                                                                          | Observational                 |
| SGPALS                  | Saltin & Grimby Physical Activity Level Scale                                         | 2 |   | Generic              | 1  | 1 (physical activity)                                                                                                                                             | Observational                 |
| SSQ14                   | Burden of cognitive complaints                                                        | 2 |   | Brain tumor specific | 3  | 1 (burden of cognitive complaints)                                                                                                                                | Interventional                |
| SSQ15                   | Brain metastases symptom checklist                                                    | 2 |   | Brain tumor specific | 17 | 1 (brain metastases symptoms)                                                                                                                                     | Interventional                |
| 10-item LASA            | 10-item Linear Analog Self-Assessment                                                 |   | 1 | Generic              | 10 | 10 (overall QoL; fatigue; frequency of pain; severity of pain; social functioning; physical; spiritual; emotional; mental well-being; unknown)                    | Interventional                |
| 5-item LASA             | 5-item Linear Analog Self-Assessment                                                  | 1 |   | Generic              | 5  | 5 (physical-; emotional-; spiritual-; intellectual well-being; overall QoL)                                                                                       | Meta-analyses                 |
| ADLS                    | Activities of Daily Living Scale                                                      | 1 |   | Brain tumor specific | 38 | 9 (self-care activities; household care; employment and recreation; shopping and money; travel; communication; social relationships; sexual function; depression) | Interventional                |

|              |                                                                 |   |  |                      |         |                                                                                                                                                                     |                |
|--------------|-----------------------------------------------------------------|---|--|----------------------|---------|---------------------------------------------------------------------------------------------------------------------------------------------------------------------|----------------|
| A-IADL-Q     | Amsterdam Instrumental Activities of Daily Living Questionnaire | 1 |  | Other indications    | 32      | 1 (IADL)                                                                                                                                                            | Observational  |
| ASDS         | Acute Stress Disorder Scale                                     | 1 |  | Other indications    | 19      | 4 (dissociation; reexperiencing; avoidance; arousal)                                                                                                                | Observational  |
| ASEX         | Arizona Sexual Experiences Scale                                | 1 |  | Generic              | 5       | 1 (sexual function)                                                                                                                                                 | Observational  |
| ASI-3        | Anxiety Sensitivity Index - 3                                   | 1 |  | Generic              | 18      | 3 (physical-; social-; cognitive concerns)                                                                                                                          | Observational  |
| ASK NASAL-12 | The Anterior Skull Base Nasal Inventory 12                      | 1 |  | Other indications    | 12      | 2 (symptom; sensory)                                                                                                                                                | Observational  |
| BICRO-39     | Brain Injury Community Rehabilitation Outcome Scale             | 1 |  | CNS disorder         | 39      | 8 (personal care; mobility; self-organization; contact with partner/own children; contact with parents/siblings; socializing; productive employment; psychological) | Observational  |
| BIS          | Body Image Scale                                                | 1 |  | Cancer specific      | 10      | 1 (body image)                                                                                                                                                      | Observational  |
| BMIS         | Brief Mood Introspection Scale                                  | 1 |  | Generic              | 16      | 4 (pleasant-unpleasant; arousal-calm; positive-tired; negative-relaxed)                                                                                             | Interventional |
| BMSC         | Brain Metastases Symptom Checklist                              | 1 |  | Brain tumor specific | 18      | 1 (brain metastases symptoms)                                                                                                                                       | Observational  |
| BPI-SF       | Brief Pain Inventory - Short Form                               | 1 |  | Cancer specific      | 9       | 2 (severity of pain; impact on daily function)                                                                                                                      | Observational  |
| BSDS         | Brief Sleep Disturbance Scale                                   | 1 |  | Cancer specific      | Unknown | Unknown                                                                                                                                                             | Interventional |

|          |                                                        |   |  |                      |    |                                                                                                  |               |
|----------|--------------------------------------------------------|---|--|----------------------|----|--------------------------------------------------------------------------------------------------|---------------|
| CARES-SF | Cancer Rehabilitation Evaluation System - Short Form   | 1 |  | Cancer specific      | 59 | 5 (physical; psychosocial; marital; medical interaction; sexual)                                 | Observational |
| CDSS     | Cambridge Depersonalisation Scale State                | 1 |  | Other indications    | 22 | 4 (emotional numbing; memories recall; alienation; body experience)                              | Observational |
| CES-D-15 | Center for Epidemiologic Studies Depression Scale - 15 | 1 |  | Generic              | 15 | 3 (somatic-retarded activity; depressed affect; interpersonal affect)                            | Observational |
| CSC-W59  | Cognitive Symptom Checklist - Work 59                  | 1 |  | Cancer specific      | 59 | 3 (attention; executive function; working memory)                                                | Observational |
| DADDS    | Death and Dying Distress Scale                         | 1 |  | Cancer specific      | 15 | 1 (death-related distress)                                                                       | Observational |
| DS       | Demoralization Scale                                   | 1 |  | Cancer specific      | 24 | 5 (loss of meaning and purpose; dysphoria; disheartenment; helplessness; sense of failure)       | Observational |
| DSQ      | Dexamethasone Symptom Questionnaire                    | 1 |  | Cancer specific      | 13 | 2 (dexamethasone side-effect; nausea/vomiting)                                                   | Observational |
| EBIQ     | European Brain Injury Questionnaire                    | 1 |  | CNS disorder         | 63 | 8 (somatic; cognitive; motivation; impulsivity; depression; isolation; physical; communication)  | Observational |
| e-RSCL   | Extended Rotterdam Symptom Checklist                   | 1 |  | Cancer specific      | 47 | 4 (physical symptom distress; psychological distress; activity level; overall evaluation of QoL) | Observational |
| ESAS-GM  | Edmonton Symptom Assessment System Glioma Module       | 1 |  | Brain tumor specific | 17 | 2 (core symptoms; neurological symptoms)                                                         | Observational |



|          |                                                |   |  |                      |    |                                                                                                                                                          |                |
|----------|------------------------------------------------|---|--|----------------------|----|----------------------------------------------------------------------------------------------------------------------------------------------------------|----------------|
| ESDQ     | Emotional and Social Dysfunction Questionnaire | 1 |  | CNS disorder         | 51 | 8 (anger; emotional dyscontrol; helplessness; inertia; fatigue; indifference; inappropriate; euphoric)                                                   | Observational  |
| ESSS     | Embodied Sense of Self Scale                   | 1 |  | Other indications    | 25 | 3 (agency; ownership; narrative)                                                                                                                         | Observational  |
| FLSI     | FACT Lung Symptom Index                        | 1 |  | Other indications    | 6  | 1 (disease specific concerns)                                                                                                                            | Interventional |
| FOP-Q-SF | Fear of Progression Questionnaire Short Form   | 1 |  | Other indications    | 12 | 4 (affective reactions; partnership/family; occupation; loss of autonomy)                                                                                | Observational  |
| FSQoLS   | Fox Simple Quality of Life Scale               | 1 |  | Cancer specific      | 25 | 2 (cognitive; affective)                                                                                                                                 | Observational  |
| GHQ-28   | General Health Questionnaire - 28              | 1 |  | Generic              | 28 | 4 (somatic symptoms; anxiety and insomnia; social dysfunction; severe depression)                                                                        | Observational  |
| GOS      | Glioma Outcomes Scale                          | 1 |  | Brain tumor specific | 21 | 1 (symptom and functional status) and single item QoL                                                                                                    | Observational  |
| GSDS     | General Sleep Disturbance Scale                | 1 |  | Generic              | 21 | 6 (difficulty getting to sleep; waking up during sleep; quality of sleep; quantity of sleep; daytime sleepiness; use of substances to help induce sleep) | Observational  |
| HDI-SF   | Hamilton Depression Inventory - Short Form     | 1 |  | Generic              | 9  | 1 (depressive symptoms)                                                                                                                                  | Observational  |
| HHI      | Herth Hope Scale                               | 1 |  | Generic              | 12 | 3 (temporality and future; positive readiness/expectancy; interconnectedness)                                                                            | Observational  |

|          |                                                                 |   |   |                      |    |                                                                                                                                                                                                                                                                    |                |
|----------|-----------------------------------------------------------------|---|---|----------------------|----|--------------------------------------------------------------------------------------------------------------------------------------------------------------------------------------------------------------------------------------------------------------------|----------------|
| HUS      | Hassles and Uplifts Scale                                       | 1 |   | Generic              | 53 | 2 (hassles; uplifts)                                                                                                                                                                                                                                               | Observational  |
| IDS-SR   | Inventory of Depressive Symptomatology - Self Report            |   | 1 | Other indications    | 30 | 3 (cognitive/mood; anxiety/arousal; sleep and appetite regulation)                                                                                                                                                                                                 | Interventional |
| IPQ-R    | Illness Perceptions Questionnaire-Revised                       | 1 |   | Brain tumor specific | 81 | 7 (identity; timeline acute/chronic; consequences; personal control; treatment control; illness coherence; timeline cyclical; emotional representation; biopsychosocial attributions; external attributions; risk factors; biological/uncontrollable attributions) | Observational  |
| LLFDI-F  | Late Life Function and Disability Instrument-Function Component | 1 |   | Other indications    | 32 | 3 (upper extremity; basic lower extremity; advanced lower extremity functions)                                                                                                                                                                                     | Observational  |
| MDASI-LC | MD Anderson Symptom Inventory Lung Cancer                       | 1 |   | Other indications    | 22 | 2 (symptom severity; interference)                                                                                                                                                                                                                                 | Observational  |
| MDMQ     | Multidimensional Mood State Questionnaire                       | 1 |   | Generic              | 30 | 3 (good-bad; awake-tired; calm-nervous)                                                                                                                                                                                                                            | Observational  |
| MHS      | Miller Hope Scale                                               | 1 |   | Generic              | 40 | 3 (satisfaction with self, others and life; avoidance of hope threats; anticipation of a future)                                                                                                                                                                   | Observational  |

|                                             |                                                                                 |   |   |                   |         |                                                                                                                   |                |
|---------------------------------------------|---------------------------------------------------------------------------------|---|---|-------------------|---------|-------------------------------------------------------------------------------------------------------------------|----------------|
| MQOLS-CA2                                   | Multidimensional Quality of Life Scale - Cancer version 2                       | 1 |   | Cancer specific   | 33      | 5 (physical-; psychological-; nutritional-; interpersonal well-being; symptom management)                         | Observational  |
| MSISQ15                                     | Multiple Sclerosis Intimacy and Sexuality Questionnaire                         |   | 1 | Other indications | 15      | 3 (primary-; secondary-; tertiary sexual dysfunction)                                                             | Interventional |
| NeuroQoL                                    | Quality of Life in Neurological Disorders                                       |   | 1 | CNS disorder      | Unknown | Unknown                                                                                                           | Observational  |
| Neuro-QOL Cognitive Function                | Quality of Life in Neurological Disorders - Cognitive Function                  | 1 |   | CNS disorder      | 28      | 2 (cognitive abilities; application of cognitive abilities to everyday tasks)                                     | Observational  |
| Neuro-QOL Emotional & Behavioral Dyscontrol | Quality of Life in Neurological Disorders - Emotional and Behavioral Dyscontrol | 1 |   | CNS disorder      | 18      | 5 (disinhibition; emotional lability; irritability; impatience; impulsiveness)                                    | Observational  |
| PASS-20                                     | Pain Anxiety Symptom Scale-20 items                                             | 1 |   | Other indications | 20      | 4 (fearful thinking; cognitive anxiety responses; escape and avoidance behavior; physiological anxiety responses) | Observational  |
| PCRS                                        | Patient Competency Rating Scale                                                 | 1 |   | Other indications | 30      | 4 (ADL; cognitive abilities; interpersonal/behavioral-; emotional function)                                       | Observational  |
| PDEQ                                        | Peritraumatic Dissociative Experience Questionnaire                             | 1 |   | Other indications | 10      | 1 (peritraumatic dissociation)                                                                                    | Interventional |
| PDS                                         | Posttraumatic Stress Diagnostic Scale                                           | 1 |   | Other indications | 49      | 4 (PTSD diagnosis; symptom severity; level of impairment of functioning)                                          | Observational  |

|                            |                                                                                         |   |   |                      |         |                                                                                              |                |
|----------------------------|-----------------------------------------------------------------------------------------|---|---|----------------------|---------|----------------------------------------------------------------------------------------------|----------------|
| PGIC                       | Patient's Global Impression of Change                                                   | 1 |   | Other indications    | 1       | 1 (health status)                                                                            | Observational  |
| PHQ-4                      | Patient Health Questionnaire 4-item                                                     | 1 |   | Generic              | 4       | 2 (depressive symptoms; anxiety symptoms)                                                    | Observational  |
| PIPP                       | Perceived Impact of Problem Profile                                                     | 1 |   | Generic              | 23      | 5 (mobility; self-care; relationships; participation; psychological well-being)              | Observational  |
| PPQ                        | Patients' Perspective Questionnaire                                                     | 1 |   | Brain tumor specific | 28      | 3 (psychosocial distress; support provided/subjective benefit; support requested)            | Observational  |
| PRMQ                       | Prospective-Retrospective Memory Questionnaire                                          |   | 1 | Generic              | 16      | 2 (prospective; retrospective)                                                               | Interventional |
| PRO-CTCAE (study-specific) | Patient-Reported Outcomes version of the Common Terminology Criteria for Adverse Events |   | 1 | Cancer specific      | Unknown | Unknown                                                                                      | Observational  |
| PROMIS Depression SF       | Patient-Reported Outcomes Measurement Information System - Depression - Short Form      | 1 |   | Generic              | 8       | 4 (negative mood; views of self; social cognition; decreased positive affect and engagement) | Interventional |
| PROMIS Fatigue             | Patient-Reported Outcomes Measurement Information System - Fatigue                      | 1 |   | Generic              | 95      | 4 (experience of fatigue; impact of fatigue on physical; mental; social activities)          | Observational  |

|                                 |                                                                                                              |   |   |                   |    |                                                                                                                                                     |                |
|---------------------------------|--------------------------------------------------------------------------------------------------------------|---|---|-------------------|----|-----------------------------------------------------------------------------------------------------------------------------------------------------|----------------|
| PROMIS Pain Intensity           | Patient-Reported Outcomes Measurement Information System - Pain Intensity                                    | 1 |   | Generic           | 3  | 1 (pain intensity)                                                                                                                                  | Observational  |
| PROMIS PIIP SF                  | Patient-Reported Outcomes Measurement Information System - Psychosocial Illness Impact-Positive - Short Form | 1 |   | Cancer specific   | 8  | 4 (self-concept; social connection; coping; meaning and spirituality)                                                                               | Observational  |
| PROMIS Sleep-Related Impairment | Patient-Reported Outcomes Measurement Information System - Sleep-Related Impairment                          | 1 |   | Generic           | 16 | 2 (alertness/sleepiness/tiredness during waking hours; functional impairments during wakefulness associated with sleep problems/impaired alertness) | Observational  |
| PROMIS-GH                       | Patient-Reported Outcomes Measurement Information System - Global Health                                     |   | 1 | Generic           | 10 | 2 (physical; mental)                                                                                                                                | Interventional |
| PSS-14                          | Perceived Stress Scale 14-item                                                                               | 1 |   | Generic           | 14 | 2 (perceived helplessness; perceived self-efficacy)                                                                                                 | Interventional |
| PTSS-10                         | Posttraumatic Symptom Scale - 10                                                                             | 1 |   | Other indications | 10 | 1 (PTSD symptoms)                                                                                                                                   | Observational  |
| QOLCS                           | Quality of Life Cancer Survivor                                                                              | 1 |   | Cancer specific   | 41 | 4 (physical-; psychological-; spiritual wellbeing; social concerns)                                                                                 | Observational  |

|                |                                              |   |   |                   |    |                                                                                                                                             |                |
|----------------|----------------------------------------------|---|---|-------------------|----|---------------------------------------------------------------------------------------------------------------------------------------------|----------------|
| RSE            | Rosenberg Self-Esteem Scale                  | 1 |   | Generic           | 10 | 1 (self-esteem)                                                                                                                             | Observational  |
| SAS            | Zung Self-Rating Anxiety Scale               | 1 |   | Generic           | 20 | 1 (anxiety symptoms)                                                                                                                        | Observational  |
| SAS-SR         | Social Adjustment Scale Self-Report          | 1 |   | Generic           | 42 | 6 (work; social and leisure; extended family; marital; parental; family unit)                                                               | Observational  |
| SDS            | Symptom Distress Scale                       | 1 |   | Cancer specific   | 13 | 1 (symptom distress)                                                                                                                        | Observational  |
| SFMPQ          | Short-Form McGill Pain Questionnaire         |   | 1 | Other indications | 15 | 2 (sensory; affective)                                                                                                                      | Interventional |
| Sintanon's 15D | Sintanon's Quality of Life Questionnaire 15D | 1 |   | Generic           | 15 | 1 (health state)                                                                                                                            | Observational  |
| SMQ            | Short-Memory Questionnaire                   | 1 |   | Other indications | 14 | 1 (memory deficits)                                                                                                                         | Observational  |
| SNOT-22        | Sino-Nasal Outcome Test                      | 1 |   | Other indications | 22 | 3 (physical problems; functional limitations; social/emotional consequences)                                                                | Observational  |
| SQ             | Symptom Questionnaire                        | 1 |   | Other indications | 92 | 4 psychological symptom scales (anxiety; depressive; anger-hostility; somatic); 4 well-being scales (contented; relaxed; friendly; somatic) | Observational  |
| SQoL           | Subjective estimation of Quality of Life     | 1 |   | Generic           | 18 | 4 (external life conditions; interpersonal relationships; internal psychological states; overall QoL)                                       | Observational  |

|       |                                                                                          |   |  |                      |    |                                                                                                                         |                |
|-------|------------------------------------------------------------------------------------------|---|--|----------------------|----|-------------------------------------------------------------------------------------------------------------------------|----------------|
| SRKP  | Self-Reported Karnofsky Performance                                                      | 1 |  | Cancer specific      | 1  | 1 (physical functioning)                                                                                                | Observational  |
| SSQ1  | Symptom relief medical marijuana                                                         | 1 |  | Brain tumor specific | 7  | 1 (symptom relief)                                                                                                      | Observational  |
| SSQ10 | Visual Analogue Scale pain                                                               | 1 |  | Brain tumor specific | 1  | 1 (pain)                                                                                                                | Interventional |
| SSQ11 | Visual Analogue Scales pain, well-being, fatigue and ability to perform daily activities | 1 |  | Brain tumor specific | 3  | 3 (well-being; fatigue; ability to perform daily activities)                                                            | Interventional |
| SSQ12 | Brain Metastases Symptom Checklist                                                       | 1 |  | Brain tumor specific | 17 | 1 (brain metastases symptoms)                                                                                           | Observational  |
| SSQ13 | Visual Analogue Scales Somnolence                                                        | 1 |  | Brain tumor specific | 5  | 5 (strong-feeble; coordinated-clumsy; lethargic-energetic; mentally slow-quick witted; full of energy-total exhaustion) | Observational  |
| SSQ16 | Quality of life                                                                          | 1 |  | Brain tumor specific | 2  | 2 (global QoL; global QoH)                                                                                              | Observational  |
| SSQ17 | Quality of life                                                                          | 1 |  | Brain tumor specific | 25 | 4 (physiological; psychological; patient satisfaction with medical care; ADL/self-care)                                 | Observational  |
| SSQ18 | Brain Metastasis Patient Survey                                                          | 1 |  | Brain tumor specific | 10 | 4 (perception regarding treatment; side effects; activity level; overall satisfaction)                                  | Observational  |
| SSQ19 | Daily symptom assessment                                                                 | 1 |  | Brain tumor specific | 3  | 1 (nausea, vomiting and headache)                                                                                       | Interventional |
| SSQ2  | Headache                                                                                 | 1 |  | Generic              | 1  | 1 (headache intensity)                                                                                                  | Observational  |

|       |                                                                               |   |  |                      |    |                                                                                                                                                    |                |
|-------|-------------------------------------------------------------------------------|---|--|----------------------|----|----------------------------------------------------------------------------------------------------------------------------------------------------|----------------|
| SSQ20 | Fear and relaxation during elective awake craniotomy                          | 1 |  | Brain tumor specific | 2  | 2 (fear, relaxation)                                                                                                                               | Observational  |
| SSQ21 | Depression                                                                    | 1 |  | Brain tumor specific | 3  | 1 (depression)                                                                                                                                     | Observational  |
| SSQ22 | Cognitive and motor function                                                  | 1 |  | Brain tumor specific | 11 | 1 (cognitive and motor function)                                                                                                                   | Observational  |
| SSQ23 | Subjective well-being                                                         | 1 |  | Brain tumor specific | 1  | 1 (subjective well-being)                                                                                                                          | Observational  |
| SSQ24 | Quality of life                                                               | 1 |  | Brain tumor specific | 21 | 1 (somatization; satisfaction in various life situations)                                                                                          | Observational  |
| SSQ25 | Innsbruck Health Dimensions Questionnaire for Neurosurgical Patients (IHD-NS) | 1 |  | CNS disorder         | 53 | 4 (economic situation; physical complaints; difficulties with ADL; social and family situation)                                                    | Observational  |
| SSQ26 | Quality of Life Measurement: the Toronto Instrument                           | 1 |  | Brain tumor specific | 29 | 9 (physical-; role-; cognitive-; social-; emotional functioning; functional well-being; physical experience; relationship with doctor; global QoL) | Interventional |
| SSQ27 | Quality of life Questionnaire                                                 | 1 |  | Brain tumor specific | 47 | 4 (physical; psychological; social; symptoms)                                                                                                      | Interventional |
| SSQ28 | Somnolence daily diary                                                        | 1 |  | Brain tumor specific | 11 | 1 (somnolence symptoms)                                                                                                                            | Observational  |
| SSQ29 | PRESTON Profile                                                               | 1 |  | Brain tumor specific | 35 | 7 (physical functioning; relatives and relationships; emotional state; social functioning; tomorrow and the future;                                | Observational  |



|       |                                                    |   |  |                      |    |                                                                                                        |               |
|-------|----------------------------------------------------|---|--|----------------------|----|--------------------------------------------------------------------------------------------------------|---------------|
|       |                                                    |   |  |                      |    | ongoing needs; neurological deficit)                                                                   |               |
| SSQ3  | Surgery-related discomfort and anxiety             | 1 |  | Brain tumor specific | 16 | 2 (anxiety; cause of discomfort)                                                                       | Observational |
| SSQ30 | Quality of life Questionnaire                      | 1 |  | Brain tumor specific | 54 | 10 (energy; leisure; cognition; socializing; work; symptoms; sex life; depression; well-being; memory) | Observational |
| SSQ31 | Physical and cognitive symptoms                    | 1 |  | Brain tumor specific | 10 | 2 (physical complaints; memory and concentration)                                                      | Observational |
| SSQ32 | Well-being L.A.S.A.                                | 1 |  | Other indications    | 10 | 3 (feelings; performance; symptoms)                                                                    | Observational |
| SSQ33 | Prediagnostic brain tumor related symptoms         | 1 |  | Brain tumor specific | 30 | 1 (prediagnostic symptoms)                                                                             | Observational |
| SSQ34 | Device-Specific Questionnaire                      | 1 |  | Brain tumor specific | 21 | 2 (effect of therapy on daily life; effect of therapy on QoL)                                          | Observational |
| SSQ35 | Impact of treatment on quality of life             | 1 |  | Brain tumor specific | 3  | 3 (alimentation and diet; complementary treatment; traditional medicine or parallel techniques)        | Observational |
| SSQ36 | Leisure Time Physical Activity Level Questionnaire | 1 |  | Generic              | 1  | 1 (leisure time physical activity level)                                                               | Observational |
| SSQ37 | Visual Analogue Scale Cosmetic Outcome             | 1 |  | Other indications    | 1  | 1 (cosmetic outcome after surgery for sphenoidal meningioma)                                           | Observational |

|                    |                                                              |   |   |                      |    |                                                                                                                                                                                                                  |                |
|--------------------|--------------------------------------------------------------|---|---|----------------------|----|------------------------------------------------------------------------------------------------------------------------------------------------------------------------------------------------------------------|----------------|
| SSQ38              | Symptoms after radiotherapy                                  |   | 1 | Cancer specific      | 12 | 1 (symptoms after radiotherapy)                                                                                                                                                                                  | Interventional |
| SSQ4               | Subjective cognitive complaints                              | 1 |   | Brain tumor specific | 31 | 3 (attention/executive function; language; memory)                                                                                                                                                               | Observational  |
| SSQ5               | Anxiety and mood                                             | 1 |   | Generic              | 2  | 2 (anxiety; mood)                                                                                                                                                                                                | Observational  |
| SSQ6               | ICF-checklist activity and participation                     | 1 |   | Generic              | 50 | 9 (learning and applying knowledge; general tasks and demands; communication; mobility; self-care; domestic life; interpersonal interaction and relationship; major life areas; community social and civic life) | Observational  |
| SSQ7               | Impact of changes since surgery/diagnosis                    | 1 |   | Brain tumor specific | 5  | 5 (emotional control; interpersonal relationships; cognition; physical ability; general day-to-day coping)                                                                                                       | Observational  |
| SSQ8               | Visual Analogue Scale Pain                                   | 1 |   | Generic              | 1  | 1 (pain)                                                                                                                                                                                                         | Observational  |
| SSQ9               | Impact of olfactory alterations on quality of life           | 1 |   | Other indications    | 1  | 1 (impact of olfactory alteration on QoL)                                                                                                                                                                        | Observational  |
| TSQ                | Taste and Smell Questionnaire                                | 1 |   | Other indications    | 14 | 2 (taste complaint; smell complaint)                                                                                                                                                                             | Observational  |
| USER-Participation | Utrecht Scale for Evaluation of Rehabilitation-Participation | 1 |   | Generic              | 32 | 4 (time spend on certain activities; frequency of certain activities; limitations in daily life; satisfaction with daily life)                                                                                   | Observational  |
| VAMS               | Visual Analog of Mood Scales                                 | 1 |   | CNS disorder         | 8  | 8 (sad; confused; afraid; happy; tired; angry; tense; energetic)                                                                                                                                                 | Observational  |

|              |                                                                        |   |   |                   |     |                                                                                                                                                                                                    |                |
|--------------|------------------------------------------------------------------------|---|---|-------------------|-----|----------------------------------------------------------------------------------------------------------------------------------------------------------------------------------------------------|----------------|
| VFQ-25       | Visual Functioning Questionnaire - 25                                  |   | 1 | Other indications | 25  | 12 (general health; general vision; ocular pain; near activities; distance activities; social functioning; mental health; role difficulties; dependency; driving; color vision; peripheral vision) | Observational  |
| WHOQOL-100   | World Health Organization Quality of Life - 100                        | 1 |   | Generic           | 100 | 6 (physical; psychological; level of independence; social relationships; environment; spirituality/religion/personal beliefs) and overall QoL and general health perception                        | Observational  |
| WI-14        | Whiteley Index (hypochondriasis) - 14                                  | 1 |   | Generic           | 14  | 3 (disease phobia; bodily preoccupation; disease conviction)                                                                                                                                       | Observational  |
| WLQ          | Work Limitations Questionnaire                                         | 1 |   | Generic           | 25  | 4 (time management; physical;- mental/interpersonal;- output demands)                                                                                                                              | Observational  |
| WPAI+CIQ:SHP | Work Productivity and Activity Impairment - Special Health Problem     | 1 |   | Generic           | 10  | 1 (work productivity and regular activities)                                                                                                                                                       | Observational  |
| WPAI-GH      | Work Productivity and Activity Impairment Questionnaire-General Health |   | 1 | Generic           | 6   | 1 (work productivity and regular activities)                                                                                                                                                       | Interventional |

## Supplementary File 1. Search string for PubMed.

((("Glioma"[majr] OR glioma\*[ti] OR neuroglioma\*[ti] OR xanthoastrocytoma\*[ti] OR xantoastrocytoma\*[ti] OR astrocytoma\*[ti] OR astro-cytoma\*[ti] OR astroglioma\*[ti] OR astro-glioma\*[ti] OR oligoastrocytoma\*[ti] OR oligoastro-cytoma\*[ti] OR glioblastom\*[ti] OR glioblastom\*[ti] OR oligodendrogloma\*[ti] OR oligo-dendrogloma\*[ti] OR oligoden-drogloma\*[ti] OR oligodendroblastoma\*[ti] OR oligo-dendro-blastoma\*[ti] OR oligo-dendroblastoma\*[ti] OR oligoden-droblastoma\*[ti] OR oligodendro-blastoma\*[ti] OR ependymom\*[ti] OR subependymom\*[ti] OR gliosarcoma\*[ti] OR glio-sarcoma\*[ti] OR "Meningioma"[majr] OR meningioma\*[ti] OR "Craniopharyngioma"[majr] OR craniopharyngioma\*[ti] OR cranio-pharyngioma\*[ti] OR brain malign\*[ti] OR malignant primary brain\*[ti] OR primary malignant brain\*[ti] OR malignant brain\*[ti] OR glial tumour\*[ti] OR glial tumor\*[ti] OR glial neoplasm\*[ti] OR glial cancer\*[ti] OR "glial carcinoma"[ti] OR "glial carcinomas"[ti] OR glial malignan\*[ti] OR neuroglial tumour\*[ti] OR neuroglial tumor\*[ti] OR neuroglial neoplasm\*[ti] OR "neuroglial cancer"[ti] OR "neuroglial cancers"[ti] OR "neuroglial carcinoma"[ti] OR "neuroglial carcinomas"[ti] OR "neuroglial malignancy"[ti] OR "neuroglial malignancies"[ti] OR "Brain Neoplasms"[majr] OR ((tumour\*[ti] OR tumor\*[ti]) AND ("brain"[ti] OR "brains"[ti] OR "cns"[ti] OR central nervous system\*[ti] OR intracranial\*[ti] OR cerebral\*[ti] OR intracerebral\*[ti] OR glial\*[ti] OR neuroglia\*[ti])) OR tumour of brain\*[ti] OR tumor of brain\*[ti] OR "tumours of brain"[ti] OR "tumors of brain"[ti] OR tumour of the brain\*[ti] OR tumor of the brain\*[ti] OR "tumours of the brain"[ti] OR "tumors of the brain"[ti] OR brain tumour\*[ti] OR brain tumor\*[ti] OR "tumour of cns"[ti] OR tumor of cns\*[ti] OR "tumours of cns"[ti] OR "tumors of cns"[ti] OR tumour of the cns\*[ti] OR tumor of the cns\*[ti] OR "tumours of the cns"[ti] OR "tumors of the cns"[ti] OR cns tumour\*[ti] OR cns tumor\*[ti] OR "tumour of central nervous system"[ti] OR tumor of central nervous system\*[ti] OR "tumours of central nervous system"[ti] OR "tumors of central nervous system"[ti] OR tumour of the central nervous system\*[ti] OR tumor of the central nervous system\*[ti] OR "tumours of the central nervous system"[ti] OR "tumors of the central nervous

system"[ti] OR central nervous system tumour\*[ti] OR central nervous system tumor\*[ti] OR intracranial tumour\*[ti] OR intracranial tumor\*[ti] OR cerebral tumour\*[ti] OR cerebral tumor\*[ti] OR intracerebral tumour\*[ti] OR intracerebral tumor\*[ti] OR ((neoplasm\*[ti]) AND ("brain"[ti] OR "brains"[ti] OR "cns"[ti] OR central nervous system\*[ti] OR intracranial\*[ti] OR cerebral\*[ti] OR intracerebral\*[ti] OR glial\*[ti] OR neuroglia\*[ti])) OR neoplasm of brain\*[ti] OR "neoplasms of brain"[ti] OR neoplasm of the brain\*[ti] OR "neoplasms of the brain"[ti] OR brain neoplasm\*[ti] OR neoplasm of cns\*[ti] OR "neoplasms of cns"[ti] OR neoplasm of the cns\*[ti] OR "neoplasms of the cns"[ti] OR cns neoplasm\*[ti] OR "neoplasm of central nervous system"[ti] OR "neoplasms of central nervous system"[ti] OR neoplasm of the central nervous system\*[ti] OR "neoplasms of the central nervous system"[ti] OR central nervous system neoplasm\*[ti] OR intracranial neoplasm\*[ti] OR cerebral neoplasm\*[ti] OR intracerebral neoplasm\*[ti] OR ((cancer\*[ti]) AND ("brain"[ti] OR "brains"[ti] OR "cns"[ti] OR central nervous system\*[ti] OR intracranial\*[ti] OR cerebral\*[ti] OR intracerebral\*[ti] OR glial\*[ti] OR neuroglia\*[ti])) OR cancer of brain\*[ti] OR "cancers of brain"[ti] OR cancer of the brain\*[ti] OR "cancers of the brain"[ti] OR brain cancer\*[ti] OR "cancer of cns"[ti] OR "cancers of cns"[ti] OR "cancer of the cns"[ti] OR "cancers of the cns"[ti] OR cns cancer\*[ti] OR "cancer of central nervous system"[ti] OR "cancers of central nervous system"[ti] OR cancer of the central nervous system\*[ti] OR "cancers of the central nervous system"[ti] OR central nervous system cancer\*[ti] OR intracranial cancer\*[ti] OR cerebral cancer\*[ti] OR "intracerebral cancer"[ti] OR "intracerebral cancers"[ti] OR ((carcinoma\*[ti]) AND ("brain"[ti] OR "brains"[ti] OR cerebral\*[ti] OR intracerebral\*[ti] OR glial\*[ti] OR neuroglia\*[ti])) OR "carcinoma of brain"[ti] OR "carcinomas of brain"[ti] OR "carcinoma of the brain"[ti] OR "carcinomas of the brain"[ti] OR brain carcinoma\*[ti] OR cerebral carcinoma\*[ti] OR "intracerebral carcinoma"[ti] OR "intracerebral carcinomas"[ti] OR ((malignan\*[ti]) AND (intracranial\*[ti] OR cerebral\*[ti] OR intracerebral\*[ti] OR glial\*[ti] OR neuroglia\*[ti])) OR cns malignan\*[ti] OR central nervous system malignan\*[ti] OR intracranial malignan\*[ti] OR cerebral malignan\*[ti] OR intracerebral malignan\*[ti] OR ("Neoplasm Metastasis"[majr] OR metasta\*[ti] OR meta-sta\*[ti]) AND ("brain"[ti] OR "brains"[ti] OR "cns"[ti] OR

central nervous system\*[ti] OR intracranial\*[ti] OR cerebral\*[ti] OR intracerebral\*[ti] OR glial\*[ti] OR neuroglia\*[ti]) OR metastasis of brain[ti] OR metastases of brain[ti] OR metastasis of the brain[ti] OR metastases of the brain[ti] OR brain metasta\*[ti] OR metastasis of cns[ti] OR metastases of cns[ti] OR metastasis of the cns[ti] OR metastases of the cns[ti] OR cns metasta\*[ti] OR metastasis of central nervous system[ti] OR metastases of central nervous system[ti] OR metastasis of the central nervous system[ti] OR metastases of the central nervous system[ti] OR central nervous system metasta\*[ti] OR intracranial metasta\*[ti] OR cerebral metasta\*[ti] OR intracerebral metasta\*[ti] OR glial metastasis[ti] OR glial metastases[ti] OR neuroglial metasta\*[ti] OR lymphoma of brain[ti] OR lymphomas of brain[ti] OR lymphoma of the brain[ti] OR lymphomas of the brain[ti] OR brain lymphoma\*[ti] OR lymphoma of cns[ti] OR lymphomas of cns[ti] OR lymphoma of the cns[ti] OR lymphomas of the cns[ti] OR cns lymphoma\*[ti] OR lymphoma of central nervous system[ti] OR lymphomas of central nervous system[ti] OR lymphoma of the central nervous system[ti] OR lymphomas of the central nervous system[ti] OR central nervous system lymphoma\*[ti] OR intracranial lymphoma\*[ti] OR cerebral lymphoma\*[ti] OR intracerebral lymphoma\*[ti] OR "glial lymphoma"[ti] OR "glial lymphomas"[ti] OR "neuroglial lymphoma"[ti] OR "neuroglial lymphomas"[ti] OR "primary central nervous system lymphoma"[ti] OR "PCNSL"[ti] OR PCNS lymphoma\*[ti] OR "CNSL"[ti] OR "metastatic brain tumor"[ti] OR "metastatic brain tumour"[ti]) AND ("Quality of Life"[mesh] OR "quality of life"[tw] OR "life quality"[tw] OR "HRQoL"[tw] OR "HRQL"[tw] OR "QoL"[tw] OR "Health Status"[mesh:NoExp] OR "health status"[tw] OR "health level"[tw] OR "health levels"[tw] OR "health outcomes"[tw] OR "health outcome"[tw] OR "patient outcomes"[tw] OR "patient outcome"[tw] OR "Patient Outcome Assessment"[mesh] OR "patient reported outcomes"[tw] OR "patient reported outcome"[tw] OR "PROs"[tw] OR "PROM"[tw] OR "PROMs"[tw] OR "symptom distress"[tw] OR "symptom burden"[tw] OR "Symptom Assessment"[mesh] OR "symptom assessment"[tw] OR "functional status"[tw] OR "patient reported symptom"[tw] OR "patient reported symptoms"[tw] OR "Health Status Indicators"[Mesh:noexp] OR "health status indicators"[tw] OR patient function\*[tw] OR patient report\*[tw] OR "Self Report"[mesh] OR self-report\*[tw] OR "wellbeing"[tw] OR "well-being"[tw] OR

questionnaire\*[tw] OR "Surveys and Questionnaires"[Mesh:NoExp] OR ((depression\*[tw] OR anxiety\*[tw] OR memory\*[tw] OR attention\*[tw] OR concentration\*[tw] OR fatigue\*[tw] OR sleep\*[tw]) AND (patient reported outcome\*[tw] OR patient report\*[tw])))) english[la] NOT ("Animals"[mesh] NOT "Humans"[mesh]) NOT (("Infant"[mesh] OR "Child"[mesh] OR "child"[ti] OR child\*[ti] OR children\*[ti] OR pediatric\*[ti] OR paediatric\*[ti]) NOT ("Adult"[mesh] OR "adult"[tw] OR "adults"[tw] OR "Adolescent"[mesh] OR "adolescent"[tw] OR "adolescents"[tw] OR adolescen\*[tw])) NOT (("Review"[ptyp] OR "Case Reports"[ptyp] OR "Comment"[ptyp] OR "Editorial"[ptyp]) NOT ("Clinical Study"[ptyp] OR "case series"[tw] OR "trial"[ti] OR "RCT"[ti] OR randomi\*[ti]))))

**Supplementary File 2. Search string for clinicaltrials.gov.**

Recruiting, Not yet recruiting, Active, not recruiting, Completed, Enrolling by invitation, Suspended, Terminated Studies | "Brain Tumor" OR "CNS Tumor" OR Glioma OR Glioblastoma OR Meningioma OR PCNSL OR "Primary central nervous system lymphoma" OR "Brain Metastases" OR "CNS Metastases" | HRQoL OR QoL OR "Quality of Life" OR "Patient Reported" OR "Self-reported" OR "Patient Outcome" OR "Daily Living" OR Questionnaire OR Survey | Adult, Older Adult | Start date from 01/01/2010 to 01/01/2020



### Supplementary File 3. Reference list of included articles.

1. Aaronson, N. K., Taphoorn, M. J. B., Heimans, J. J., Postma, T. J., Gundy, C. M., Beute, G. N., ... Klein, M. (2011). Compromised health-related quality of life in patients with low-grade glioma. *Journal of Clinical Oncology*, *29*(33), 4430–4435. <https://doi.org/10.1200/JCO.2011.35.5750>
2. Aerts, H., Van Vrekhem, T., Stas, L., & Marinazzo, D. (2019). The interplay between emotion regulation, emotional well-being, and cognitive functioning in brain tumor patients and their caregivers: An exploratory study. *Psycho-oncology*, *28*(10), 2068-2075.
3. Acquaye, A. A., Lin, L., Vera-Bolanos, E., Gilbert, M. R., & Armstrong, T. S. (2015). Hope and mood changes throughout the primary brain tumor illness trajectory. *Neuro-Oncology*, *18*(1), 119-125.
4. Acquaye, A. A., Payén, S. S., Vera, E., Williams, L. A., Gilbert, M. R., Weathers, S. P., & Armstrong, T. S. (2019). Identifying symptom recurrences in primary brain tumor patients using the MDASI-BT and qualitative interviews. *Journal of patient-reported outcomes*, *3*(58). <https://doi.org/10.1186/s41687-019-0143-0>
5. Acquaye, A. A., Vera-Bolanos, E., Armstrong, T. S., Gilbert, M. R., & Lin, L. (2013). Mood disturbance in glioma patients. *Journal of Neuro-Oncology*, *113*(3), 505-512.
6. Addeo, R., Caraglia, M., Faiola, V., Capasso, E., Vincenzi, B., Montella, L., ... Del Prete, S. (2007). Concomitant treatment of brain metastasis with Whole Brain Radiotherapy [WBRT] and Temozolomide [TMZ] is active and improves quality of life. *BMC Cancer*, *7*. <https://doi.org/10.1186/1471-2407-7-18>
7. Addeo, R., Sperlongano, P., Montella, L., Vincenzi, B., Carraturo, M., Iodice, P., ... Caraglia, M. (2012). Protracted low dose of oral vinorelbine and temozolomide with whole-brain radiotherapy in the treatment for breast cancer patients with brain metastases. *Cancer Chemotherapy and Pharmacology*, *70*(4), 603–609. <https://doi.org/10.1007/s00280-012-1945-4>
8. Adhikari, N., Biswas, A., Gogia, A., Sahoo, R. K., Garg, A., Nehra, A., ... Chander, S. (2018). A prospective phase II trial of response adapted whole brain radiotherapy after high dose methotrexate based chemotherapy in patients with newly diagnosed primary central nervous system lymphoma-analysis of acute toxicity profile and early clinical outcome. *Journal of Neuro-Oncology*, *139*(1), 153–166. <https://doi.org/10.1007/s11060-018-2856-y>
9. Affronti, M. Lou, Randazzo, D., Lipp, E. S., Peters, K. B., Herndon, S. C., Woodring, S., ... Schneider, S. M. (2018, December 1). Pilot Study to Describe the Trajectory of Symptoms and Adaptive Strategies of Adults Living with Low-grade Glioma. *Seminars in Oncology Nursing*. W.B. Saunders. <https://doi.org/10.1016/j.soncn.2018.10.006>
10. Affronti, M. Lou, Schneider, S. M., Herndon, J. E., Schlundt, S., & Friedman, H. S. (2014). Adherence to antiemetic guidelines in patients with malignant glioma: A quality improvement project to translate evidence into practice. *Supportive Care in Cancer*, *22*(7), 1897–1905. <https://doi.org/10.1007/s00520-014-2136-0>
11. Affronti, M. Lou, Woodring, S., Allen, K., Kirkpatrick, J., Peters, K. B., Herndon, J. E., ... Friedman, H. S. (2016). Phase II study to evaluate the safety and efficacy of intravenous palonosetron (PAL) in primary malignant glioma (MG) patients receiving standard radiotherapy (RT) and concomitant temozolomide (TMZ). *Supportive Care in Cancer*, *24*(10), 4365–4375. <https://doi.org/10.1007/s00520-016-3276-1>
12. Affronti, M. Lou, Woodring, S., Peters, K. B., Herndon, J. E., McSherry, F., Healy, P. N., ... Friedman, H. S. (2017). A Phase II single-arm trial of palonosetron for the prevention of acute and delayed chemotherapy-induced nausea and vomiting in malignant glioma patients receiving multidose irinotecan in combination with bevacizumab. *Therapeutics and Clinical Risk Management*, *13*, 33–40. <https://doi.org/10.2147/TCRM.S122480>
13. Agarwal, J. P., Chakraborty, S., Laskar, S. G., Mummudi, N., Patil, V. M., Upasani, M., ... Badhe, R. (2018). Applying the QUARTZ Trial Results in Clinical Practice: Development of a Prognostic

- Model Predicting Poor Outcomes for Non-small Cell Lung Cancers with Brain Metastases. *Clinical Oncology*, 30(6), 382–390. <https://doi.org/10.1016/j.clon.2018.02.002>
14. Agarwal, J. P., Chakraborty, S., Laskar, S. G., Mummudi, N., Patil, V. M., Prabhash, K., ... Badhe, R. (2017). Prognostic value of a patient-reported functional score versus physician-reported Karnofsky Performance Status Score in brain metastases. *Ecancermedicalscience*, 11. <https://doi.org/10.3332/ecancer.2017.779>
  15. Aggarwal, J., Chakraborty, S., Ghosh Laskar, S., Patil, V. M., Prabhash, K., Bhattacharya, A., ... Badhe, R. (2017). Reference Data for Standardized Quality of Life Questionnaires in Indian Patients with Brain Metastases from Non-small Cell Lung Cancer: Results from a Prospective Study. *Cureus*. <https://doi.org/10.7759/cureus.1149>
  16. Ahluwalia, M. S., Xie, H., Dahiya, S., Hashemi-Sadraei, N., Schiff, D., Fisher, P. G., ... Peereboom, D. M. (2015). Efficacy and patient-reported outcomes with dose-intense temozolomide in patients with newly diagnosed pure and mixed anaplastic oligodendroglioma: a phase II multicenter study. *Journal of Neuro-Oncology*, 122(1), 111–119. <https://doi.org/10.1007/s11060-014-1684-y>
  17. Akhtar, M. S., Kousar, F., Fatmi, S., Jabeen, K., & Akhtar, K. (2012). Quality of Life and Symptoms Control in Brain Metastasis After Palliative Whole Brain Radiotherapy Using Two Different Protocols. *Journal of the College of Physicians and Surgeons Pakistan*, 22(5), 311-316.
  18. Allen, D., Carlson, B. W., Carlson, J. R., Raynor, R. H., & Neelon, V. J. (2020). Assessing Discrepancies in Neurocognitive and Patient-Reported Measures of Brain Tumor Survivors. In *Oncology nursing forum*, 47(1), E1-E12.
  19. Amatya, B., Khan, F., Ng, L., & Galea, M. (2014). Supportive Care Needs following Cancer Treatment: A Comparison of Breast and Brain Cancer in an Australian Cohort. *ISRN Rehabilitation*, 2014, 1–10. <https://doi.org/10.1155/2014/945472>
  20. Anders, C., Deal, A. M., Abramson, V., Liu, M. C., Storniolo, A. M., Carpenter, J. T., ... Carey, L. A. (2014). TBCRC 018: Phase II study of iniparib in combination with irinotecan to treat progressive triple negative breast cancer brain metastases. *Breast Cancer Research and Treatment*, 146(3), 557–566. <https://doi.org/10.1007/s10549-014-3039-y>
  21. Andrewes, H. E., Drummond, K. J., Rosenthal, M., Bucknill, A., & Andrewes, D. G. (2013). Awareness of psychological and relationship problems amongst brain tumour patients and its association with carer distress. *Psycho-Oncology*, 22(10), 2200–2205. <https://doi.org/10.1002/pon.3274>
  22. Aprile, I., Chiesa, S., Padua, L., Di Blasi, C., Arezzo, M. F., Valentini, V., ... Balducci, M. (2015). Occurrence and predictors of the fatigue in high-grade glioma patients. *Neurological Sciences*, 36(8), 1363–1369. <https://doi.org/10.1007/s10072-015-2111-7>
  23. Armstrong, T. S., Bishof, A. M., Brown, P. D., Klein, M., Taphoorn, M. J. B., & Theodore-Oklot, C. (2016). Determining priority signs and symptoms for use as clinical outcomes assessments in trials including patients with malignant gliomas: Panel 1 Report. *Neuro-Oncology*, 18, ii1–ii12. <https://doi.org/10.1093/neuonc/nov267>
  24. Armstrong, T. S., Gning, I., Mendoza, T. R., Weinberg, J. S., Gilbert, M. R., Tortorice, M. L., & Cleeland, C. S. (2009). Clinical Utility of the MDASI-BT in Patients with Brain Metastases. *Journal of Pain and Symptom Management*, 37(3), 331–340. <https://doi.org/10.1016/j.jpainsymman.2008.02.011>
  25. Armstrong, T. S., Vera-Bolanos, E., Acquaye, A. A., Gilbert, M. R., Ladha, H., & Mendoza, T. (2016). The symptom burden of primary brain tumors: Evidence for a core set of tumor-and treatment-related symptoms. *Neuro-Oncology*, 18(2), 252–260. <https://doi.org/10.1093/neuonc/nov166>
  26. Armstrong, T. S., Vera-Bolanos, E., Acquaye, A., Gilbert, M. R., & Mendoza, T. R. (2014). Impact of recall period on primary brain tumor patient's self-report of symptoms. *Neuro-Oncology Practice*, 1(2), 55–63. <https://doi.org/10.1093/nop/npu006>

27. Armstrong, T. S., Wefel, J. S., Gning, I., Acquaye, A., Vera-Bolanos, E., Gilbert, M. R., ... Mendoza, T. (2012). Congruence of primary brain tumor patient and caregiver symptom report. *Cancer*, *118*(20), 5026–5037. <https://doi.org/10.1002/cncr.27483>
28. Armstrong, T. S., Wefel, J. S., Wang, M., Gilbert, M. R., Won, M., Bottomley, A., ... Mehta, M. (2013). Net clinical benefit analysis of Radiation Therapy Oncology Group 0525: A phase III trial comparing conventional adjuvant temozolomide with dose-intensive temozolomide in patients with newly diagnosed glioblastoma. In *Journal of Clinical Oncology* (Vol. 31, pp. 4076–4084). American Society of Clinical Oncology. <https://doi.org/10.1200/JCO.2013.49.6067>
29. Armstrong, T. S., Ying, Y., Wu, J., Acquaye, A. A., Vera-Bolanos, E., Gilbert, M. R., ... Chung, C. (2015). The relationship between corticosteroids and symptoms in patients with primary brain tumors: Utility of the Dexamethasone Symptom Questionnaire-Chronic. *Neuro-Oncology*, *17*(8), 1114–1120. <https://doi.org/10.1093/neuonc/nov054>
30. Armstrong, T., Cohen, M. Z., Hess, K. R., Manning, R., Lee, E. L. T., Tamayo, G., ... Gilbert, M. (2006). Complementary and Alternative Medicine Use and Quality of Life in Patients with Primary Brain Tumors. *Journal of Pain and Symptom Management*, *32*(2), 148–154. <https://doi.org/10.1016/j.jpainsymman.2006.02.015>
31. Awwad, S., Cull, A., & Gregor, A. (1990). *Clinical Oncology Original Article Long-Term Survival in Adult Hemispheric Glioma: Prognostic Factors and Quality of Outcome*. *Clinical Oncology* (Vol. 2).
32. Badruddoja, M. A., Pazzi, M., Sanan, A., Schroeder, K., Kuzma, K., Norton, T., ... Ahmadi, M. M. (2017). Phase II study of bi-weekly temozolomide plus bevacizumab for adult patients with recurrent glioblastoma. *Cancer Chemotherapy and Pharmacology*, *80*(4), 715–721. <https://doi.org/10.1007/s00280-017-3405-7>
33. Bähr, O., Hermisson, M., Rona, S., Rieger, J., Nussbaum, S., Körtvelyessy, P., ... Steinbach, J. P. (2012). Intravenous and oral levetiracetam in patients with a suspected primary brain tumor and symptomatic seizures undergoing neurosurgery: The HELLO trial. *Acta Neurochirurgica*, *154*(2), 229–235. <https://doi.org/10.1007/s00701-011-1144-9>
34. Baima, J., Omer, Z. B., Varlotto, J., & Yunus, S. (2017). Compliance and safety of a novel home exercise program for patients with high-grade brain tumors, a prospective observational study. *Supportive Care in Cancer*, *25*(9), 2809–2814. <https://doi.org/10.1007/s00520-017-3695-7>
35. Balana, C., De Las Penas, R., Sepúlveda, J. M., Gil-Gil, M. J., Luque, R., Gallego, O., ... Villà, S. (2016). Bevacizumab and temozolomide versus temozolomide alone as neoadjuvant treatment in unresected glioblastoma: the GENOM 009 randomized phase II trial. *Journal of Neuro-Oncology*, *127*(3), 569–579. <https://doi.org/10.1007/s11060-016-2065-5>
36. Bampoe, J., Laperriere, N., Pintilie, M., Glen, J., Micallef, J., & Bernstein, M. (2000). *Quality of life in patients with glioblastoma multiforme participating in a randomized study of brachytherapy as a boost treatment*.
37. Bauman, G., Yartsev, S., Roberge, D., MacRae, R., Roa, W., Panet-Raymond, V., ... Rodrigues, G. (2016). Assessment of function and quality of life in a phase II multi-institutional clinical trial of fractionated simultaneous in-field boost radiotherapy for patients with 1–3 metastases. *Journal of Neuro-Oncology*, *128*(3), 431–436. <https://doi.org/10.1007/s11060-016-2128-7>
38. Baumert, B. G., Hegi, M. E., van den Bent, M. J., von Deimling, A., Gorlia, T., Hoang-Xuan, K., ... Stupp, R. (2016). Temozolomide chemotherapy versus radiotherapy in high-risk low-grade glioma (EORTC 22033-26033): a randomised, open-label, phase 3 intergroup study. *The Lancet Oncology*, *17*(11), 1521–1532. [https://doi.org/10.1016/S1470-2045\(16\)30313-8](https://doi.org/10.1016/S1470-2045(16)30313-8)
39. Baumstarck, K., Leroy, T., Hamidou, Z., Tabouret, E., Farina, P., Barrié, M., ... Auquier, P. (2016). Coping with a newly diagnosed high-grade glioma: patient-caregiver dyad effects on quality of life. *Journal of Neuro-Oncology*, *129*(1), 155–164. <https://doi.org/10.1007/s11060-016-2161-6>
40. Baumstarck, K., Chinot, O., Tabouret, E., Farina, P., Barrié, M., Campello, C., ... Auquier, P. (2018). Coping strategies and quality of life: A longitudinal study of high-grade glioma patient-caregiver dyads. *Health and Quality of Life Outcomes*, *16*(1). <https://doi.org/10.1186/s12955-018-0983-y>

41. Bedard, G., Ray, S., Zhang, L., Zeng, L., Cella, D., Wong, E., ... Chow, E. (2014). Validation of the Brain Symptom and Impact Questionnaire (BASIQ) to assess symptom and quality of life in brain metastases. *CNS Oncology*, 3(4), 275–285. <https://doi.org/10.2217/cns.14.28>
42. Bedetti, C., Romoli, M., Maschio, M., Di Bonaventura, C., Nardi Cesarini, E., Eusebi, P., ... Costa, C. (2017). Neuropsychiatric adverse events of antiepileptic drugs in brain tumour-related epilepsy: an Italian multicentre prospective observational study. *European Journal of Neurology*, 24(10), 1283–1289. <https://doi.org/10.1111/ene.13375>
43. Benz, L. S., Wrensch, M. R., Schildkraut, J. M., Bondy, M. L., Warren, J. L., Wiemels, J. L., & Claus, E. B. (2018). Quality of life after surgery for intracranial meningioma. *Cancer*, 124(1), 161–166. <https://doi.org/10.1002/cncr.30975>
44. Berger, A., Strauss, I., Ben Moshe, S., Corn, B. W., Limon, D., Shtraus, N., ... Kanner, A. A. (2018). Neurocognitive evaluation of brain metastases patients treated with post-resection stereotactic radiosurgery: a prospective single arm clinical trial. *Journal of Neuro-Oncology*, 140(2), 307–315. <https://doi.org/10.1007/s11060-018-2954-x>
45. Berkowitz, O., Jones, K., Lunsford, L. D., & Kondziolka, D. (2013). Determining the elements of procedural quality. *Journal of Neurosurgery*, 119(2), 373–380. <https://doi.org/10.3171/2013.1.JNS111681>
46. Bette, S., Gradtke, C. V., Cammardella, J. H., Albertshausen, J., Wiestler, B., Barz, M., ... & Gempt, J. (2020). Perioperative neurocognitive functions in patients with neuroepithelial intracranial tumors. *Journal of Neuro-Oncology*, 147(1), 77–89.
47. Bezjak, A., Adam, J., Barton, R., Panzarella, T., Laperriere, N., Wong, C. S., ... Kirkbride, P. (n.d.). *Symptom response after palliative radiotherapy for patients with brain metastases*.
48. Bigatão, M. dos R., Peria, F. M., Tirapelli, D. P. C., & Carlotti Junior, C. G. (2016). Programa educativo para fadiga em pacientes com tumor cerebral: Possibilidade de estratégia? *Arquivos de Neuro-Psiquiatria*, 74(2), 155–160. <https://doi.org/10.1590/0004-282X20160007>
49. Bitterlich, C., & Vordermark, D. (2017). Analysis of health-related quality of life in patients with brain tumors prior and subsequent to radiotherapy. *Oncology Letters*, 14(2), 1841–1846. <https://doi.org/10.3892/ol.2017.6310>
50. Blonski, M., Taillandier, L., Herbet, G., Maldonado, I. L., Beauchesne, P., Fabbro, M., ... Duffau, H. (2012). Combination of neoadjuvant chemotherapy followed by surgical resection as a new strategy for WHO grade II gliomas: A study of cognitive status and quality of life. *Journal of Neuro-Oncology*, 106(2), 353–366. <https://doi.org/10.1007/s11060-011-0670-x>
51. Bø, H. K., Solheim, O., Kvistad, K. A., Berntsen, E. M., Torp, S. H., Skjulsvik, A. J., ... Jakola, A. S. (2020). Intraoperative 3D ultrasound-guided resection of diffuse low-grade gliomas: Radiological and clinical results. *Journal of Neurosurgery*, 132(2), 518–529. <https://doi.org/10.3171/2018.10.JNS181290>
52. Boele, F. W., Douw, L., De Groot, M., Van Thuijl, H. F., Cleijne, W., Heimans, J. J., ... Klein, M. (2013). The effect of modafinil on fatigue, cognitive functioning, and mood in primary brain tumor patients: A multicenter randomized controlled trial. *Neuro-Oncology*, 15(10), 1420–1428. <https://doi.org/10.1093/neuonc/not102>
53. Boele, F. W., Douw, L., Reijneveld, J. C., Robben, R., Taphoorn, M. J. B., Aaronson, N. K., ... Klein, M. (2015). Health-related quality of life in stable, long-term survivors of low-grade glioma. *Journal of Clinical Oncology*, 33(9), 1023–1029. <https://doi.org/10.1200/JCO.2014.56.9079>
54. Boele, F. W., Heimans, J. J., Aaronson, N. K., Taphoorn, M. J. B., Postma, T. J., Reijneveld, J. C., & Klein, M. (2013). Health-related quality of life of significant others of patients with malignant CNS versus non-CNS tumors: A comparative study. *Journal of Neuro-Oncology*, 115(1), 87–94. <https://doi.org/10.1007/s11060-013-1198-z>
55. Boele, F. W., Hoeben, W., Hilverda, K., Lenting, J., Calis, A. L., Sizoo, E. M., ... Klein, M. (2013). Enhancing quality of life and mastery of informal caregivers of high-grade glioma patients: A randomized controlled trial. *Journal of Neuro-Oncology*, 111(3), 303–311. <https://doi.org/10.1007/s11060-012-1012-3>

56. Boele, F. W., Klein, M., Verdonck-de Leeuw, I. M., Cuijpers, P., Heimans, J. J., Snijders, T. J., ... Reijneveld, J. C. (2018). Internet-based guided self-help for glioma patients with depressive symptoms: a randomized controlled trial. *Journal of Neuro-Oncology*, *137*(1), 191–203. <https://doi.org/10.1007/s11060-017-2712-5>
57. Boele, F. W., Meads, D., Jansen, F., Verdonck-de Leeuw, I. M., Heimans, J. J., Reijneveld, J. C., ... & Klein, M. (2020). Healthcare utilization and productivity loss in glioma patients and family caregivers: the impact of treatable psychological symptoms. *Journal of Neuro-oncology*, *147*, 485-494. <https://doi.org/10.1007/s11060-020-03454-3>
58. Boele, F. W., Zant, M., Heine, E. C. E., Aaronson, N. K., Taphoorn, M. J. B., Reijneveld, J. C., ... Klein, M. (2014). The association between cognitive functioning and health-related quality of life in low-grade glioma patients. *Neuro-Oncology Practice*, *1*(2), 40–46. <https://doi.org/10.1093/nop/npu007>
59. Bosma, I., Reijneveld, J. C., Douw, L., Vos, M. J., Postma, T. J., Aaronson, N. K., ... Klein, M. (2009). Health-related quality of life of long-term high-grade glioma survivors. *Neuro-Oncology*, *11*(1), 51–58. <https://doi.org/10.1215/15228517-2008-049>
60. Bosnyák, E., Kamson, D. O., Behen, M. E., Barger, G. R., Mittal, S., & Juhász, C. (2015). Imaging cerebral tryptophan metabolism in brain tumor-associated depression. *EJNMMI Research*, *5*(1). <https://doi.org/10.1186/s13550-015-0136-9>
61. Brada, M., Hoang-Xuan, K., Rampling, R., Dietrich, P.-Y., Dirix, L. Y., Macdonald, D., ... Zaknoen, & S. (2001). *Multicenter phase II trial of temozolomide in patients with glioblastoma multiforme at first relapse*. *Annals of Oncology* (Vol. 12).
62. Brada, M., Viviers, L., Abson, C., Hines, F., Britton, J., Ashley, S., ... Westbury, C. (2003). Phase II study of primary temozolomide chemotherapy in patients with WHO grade II gliomas. *Annals of Oncology*, *14*(12), 1715–1721. <https://doi.org/10.1093/annonc/mdg371>
63. Brada, M., Stenning, S., Gabe, R., Thompson, L. C., Levy, D., Rampling, R., ... Lee, S. M. (2010). Temozolomide versus procarbazine, lomustine, and vincristine in recurrent high-grade glioma. *Journal of Clinical Oncology*, *28*(30), 4601–4608. <https://doi.org/10.1200/JCO.2009.27.1932>
64. Bragstad, S., Flatebo, M., Natvig, G. K., Eide, G. E., Skeie, G. O., Behbahani, M., ... Skeie, B. S. (2018). Predictors of quality of life and survival following Gamma Knife surgery for lung cancer brain metastases: A prospective study. *Journal of Neurosurgery*, *129*(1), 71–83. <https://doi.org/10.3171/2017.2.JNS161659>
65. Brandes, A. A., Finocchiaro, G., Zagonel, V., Reni, M., Caserta, C., Fabi, A., ... Franceschi, E. (2016). AVAREG: A phase II, randomized, noncomparative study of fotemustine or bevacizumab for patients with recurrent glioblastoma. *Neuro-Oncology*, *18*(9), 1304–1312. <https://doi.org/10.1093/neuonc/nov035>
66. Brandes, A. A., Gil-Gil, M., Saran, F., Carpentier, A. F., Nowak, A. K., Mason, W., ... Pichler, J. (2019). A Randomized Phase II Trial (TAMIGA) Evaluating the Efficacy and Safety of Continuous Bevacizumab Through Multiple Lines of Treatment for Recurrent Glioblastoma. *The Oncologist*, *24*(4), 521–528. <https://doi.org/10.1634/theoncologist.2018-0290>
67. Bromberg, J. E. C., Issa, S., Bakunina, K., Minnema, M. C., Seute, T., Durian, M., ... Doorduijn, J. K. (2019). Rituximab in patients with primary CNS lymphoma (HOVON 105/ALLG NHL 24): a randomised, open-label, phase 3 intergroup study. *The Lancet Oncology*, *20*(2), 216–228. [https://doi.org/10.1016/S1470-2045\(18\)30747-2](https://doi.org/10.1016/S1470-2045(18)30747-2)
68. Brown, N., McBain, C., Nash, S., Hopkins, K., Sanghera, P., Saran, F., ... Mulholland, P. (2016). Multi-center randomized phase II study comparing cediranib plus gefitinib with cediranib plus placebo in subjects with recurrent/progressive glioblastoma. *PLoS ONE*, *11*(5). <https://doi.org/10.1371/journal.pone.0156369>
69. Brown, P. D., Ballman, K. V., Rummans, T. A., Maurer, M. J., Sloan, J. A., Boeve, B. F., ... Buckner, J. C. (2006). Prospective study of quality of life in adults with newly diagnosed high-grade gliomas. *Journal of Neuro-Oncology*, *76*(3), 283–291. <https://doi.org/10.1007/s11060-005-7020-9>

70. Brown, P. D., Decker, P. A., Rummans, T. A., Clark, M. M., Frost, M. H., Ballman, K. V., ... & Buckner, J. C. (2008). A prospective study of quality of life in adults with newly diagnosed high-grade gliomas: comparison of patient and caregiver ratings of quality of life. *American Journal of Clinical Oncology*, 31(2), 163-168.
71. Brown, P. D., Gondi, V., Pugh, S., Tome, W. A., Wefel, J. S., Armstrong, T. S., ... & Grosshans, D. (2020). Hippocampal avoidance during whole-brain radiotherapy plus memantine for patients with brain metastases: Phase III trial NRG Oncology CC001. *Journal of Clinical Oncology*, 38(10), 1019-1029.
72. Brown, P. D., Jaeckle, K., Ballman, K. V., Farace, E., Cerhan, J. H., Keith Anderson, S., ... Asher, A. L. (2016). Effect of radiosurgery alone vs radiosurgery with whole brain radiation therapy on cognitive function in patients with 1 to 3 brain metastases a randomized clinical trial. *JAMA - Journal of the American Medical Association*, 316(4), 401-409. <https://doi.org/10.1001/jama.2016.9839>
73. Brown, P. D., Maurer, M. J., Rummans, T. A., Pollock, B. E., Ballman, K. V., Sloan, J. A., ... Buckner, J. C. (2005). A prospective study of quality of life in adults with newly diagnosed high-grade gliomas: The impact of the extent of resection on quality of life and survival. *Neurosurgery*, 57(3), 495-503. <https://doi.org/10.1227/01.NEU.0000170562.25335.C7>
74. Bruce, J. N., Fine, R. L., Canoll, P., Yun, J., Kennedy, B. C., Rosenfeld, S. S., ... Delapaz, R. L. (2011). Regression of recurrent malignant gliomas with convection-enhanced delivery of topotecan. *Neurosurgery*, 69(6), 1272-1279. <https://doi.org/10.1227/NEU.0b013e3182233e24>
75. Budrukkar, A., Jalali, R., Dutta, D., Sarin, R., Devlekar, R., Parab, S., & Kakde, A. (2009). Prospective assessment of quality of life in adult patients with primary brain tumors in routine neurooncology practice. *Journal of Neuro-Oncology*, 95(3), 413-419. <https://doi.org/10.1007/s11060-009-9939-8>
76. Bunevicius, A., Deltuva, V. P., & Tamasauskas, A. (2017). *Oncotarget* 57543 [www.impactjournals.com/oncotarget](http://www.impactjournals.com/oncotarget) Association of pre-operative depressive and anxiety symptoms with five-year survival of glioma and meningioma patients: a prospective cohort study. *Oncotarget* (Vol. 8).
77. Bunston, T., Mings, D., Laperriere, N., Malcolm, J., & Williams, D. W. (1998). *The impact of psychosocial need and needs resolution on quality of life in patients with brain tumors Key Words \* brain tumor \* quality of life \* psychosocial need. Neurosurg Focus* (Vol. 4).
78. Butler, J. M., Case, L. D., Atkins, J., Frizzell, B., Sanders, G., Griffin, P., ... Shaw, E. G. (2007). A Phase III, Double-Blind, Placebo-Controlled Prospective Randomized Clinical Trial of d-Threo-Methylphenidate HCl in Brain Tumor Patients Receiving Radiation Therapy. *International Journal of Radiation Oncology Biology Physics*, 69(5), 1496-1501. <https://doi.org/10.1016/j.ijrobp.2007.05.076>
79. Cabrera, A. R., Cuneo, K. C., Desjardins, A., Sampson, J. H., McSherry, F., Herndon, J. E., ... Kirkpatrick, J. P. (2013). Concurrent stereotactic radiosurgery and bevacizumab in recurrent malignant gliomas: A prospective trial. *International Journal of Radiation Oncology Biology Physics*, 86(5), 873-879. <https://doi.org/10.1016/j.ijrobp.2013.04.029>
80. Cabrera, S., Edelstein, K., Mason, W. P., & Tartaglia, M. C. (2016). Assessing behavioral syndromes in patients with brain tumors using the frontal systems behavior scale (FrSBe). *Neuro-Oncology Practice*, 3(2), 113-119. <https://doi.org/10.1093/nop/npv055>
81. Cacho-Díaz, B., Lorenzana-Mendoza, N. A., & Oñate-Ocaña, L. F. (2019). Quality of life in brain cancer: Clinical validation of the Mexican-Spanish version of the EORTC QLQ-BN20 questionnaire. *Frontiers in Neurology*, 10. <https://doi.org/10.3389/fneur.2019.00040>
82. Cahill, J. E., Lin, L., LoBiondo-Wood, G., Armstrong, T. S., Acquaye, A. A., Vera-Bolanos, E., ... Padhye, N. S. (2014). Personal health records, symptoms, uncertainty, and mood in brain tumor patients. *Neuro-Oncology Practice*, 1(2), 64-70. <https://doi.org/10.1093/nop/npu005>
83. Caissie, A., Culleton, S., Nguyen, J., Zhang, L., Zeng, L., Holden, L., ... Chow, E. (2012). EORTC QLQ-C15-PAL quality of life scores in patients with advanced cancer referred for palliative



- radiotherapy. *Supportive Care in Cancer*, 20(4), 841–848. <https://doi.org/10.1007/s00520-011-1160-6>
84. Caissie, A., Nguyen, J., Chen, E., Zhang, L., Sahgal, A., Clemons, M., ... Chow, E. (2012). Quality of life in patients with brain metastases using the EORTC QLQ-BN20+2 and QLQ-C15-PAL. *International Journal of Radiation Oncology Biology Physics*, 83(4), 1238–1245. <https://doi.org/10.1016/j.ijrobp.2011.09.025>
  85. Calvio, L., Feuerstein, M., Hansen, J., & Luff, G. M. (2009). Cognitive limitations in occupationally active malignant brain tumour survivors. *Occupational Medicine*, 59(6), 406–412. <https://doi.org/10.1093/occmed/kqp094>
  86. Campanella, F., Palese, A., Del Missier, F., Moreale, R., Ius, T., Shallice, T., ... Skrap, M. (2017). Long-Term Cognitive Functioning and Psychological Well-Being in Surgically Treated Patients with Low-Grade Glioma. *World Neurosurgery*, 103, 799-808.e9. <https://doi.org/10.1016/j.wneu.2017.04.006>
  87. Capozzi, L. C., Boldt, K. R., Easaw, J., Bultz, B., & Culos-Reed, S. N. (2016, March 1). Evaluating a 12-week exercise program for brain cancer patients. *Psycho-Oncology*. John Wiley and Sons Ltd. <https://doi.org/10.1002/pon.3842>
  88. Caraglia, M., Addeo, R., Costanzo, R., Montella, L., Faiola, V., Marra, M., ... Del Prete, S. (2006). Phase II study of temozolomide plus pegylated liposomal doxorubicin in the treatment of brain metastases from solid tumours. *Cancer Chemotherapy and Pharmacology*, 57(1), 34–39. <https://doi.org/10.1007/s00280-005-0001-z>
  89. Caravatta, L., Deodato, F., Ferro, M., Macchia, G., Massaccesi, M., Cilla, S., ... Morganti, A. G. (2012). A phase I study of short-course accelerated whole brain radiation therapy for multiple brain metastases. In *International Journal of Radiation Oncology Biology Physics* (Vol. 84). Elsevier Inc. <https://doi.org/10.1016/j.ijrobp.2012.06.023>
  90. Catt, S., Chalmers, A., Critchley, G., & Fallowfield, L. (2012). Supportive follow-up in patients treated with radical intent for high-grade glioma. *CNS Oncology*, 1(1), 39–48. <https://doi.org/10.2217/cns.12.8>
  91. Chen, E., Cella, D., Zeng, L., Thavarajah, N., Zhang, L., Chang, E., ... Chow, E. (2014). Content validation of the FACT-Br with patients and health-care professionals to assess quality of life in patients with brain metastases. *Journal of Radiation Oncology*, 3(1), 105–113. <https://doi.org/10.1007/s13566-012-0057-4>
  92. Chen, E., Nguyen, J., Zhang, L., Zeng, L., Holden, L., Lauzon, N., ... Chow, E. (2012). Quality of life in patients with brain metastases using the EORTC QLQ-BN20 and QLQ-C30. *Journal of Radiation Oncology*, 1(2), 179–186. <https://doi.org/10.1007/s13566-012-0016-0>
  93. Chen, P., Wang, G., Ma, R., Jing, F., Zhang, Y., Wang, Y., ... Zhang, X. (2016). Multidimensional assessment of empathic abilities in patients with insular glioma. *Cognitive, Affective and Behavioral Neuroscience*, 16(5), 962–975. <https://doi.org/10.3758/s13415-016-0445-0>
  94. Cheng, J. X., Liu, B. lin, Zhang, X., Lin, W., Zhang, Y. qiang, Liu, W. ping, ... Yin, H. (2010). Health-related quality of life in glioma patients in China. *BMC Cancer*, 10. <https://doi.org/10.1186/1471-2407-10-305>
  95. Chinot, O. L., Wick, W., Mason, W., Henriksson, R., Saran, F., Nishikawa, R., ... Cloughesy, T. (2014). Bevacizumab plus radiotherapy-temozolomide for newly diagnosed glioblastoma. *New England Journal of Medicine*, 370(8), 709–722. <https://doi.org/10.1056/NEJMoa1308345>
  96. Chiocca, E. A., Aguilar, L. K., Bell, S. D., Kaur, B., Hardcastle, J., Cavaliere, R., ... New, P. Z. (2011). Phase IB study of gene-mediated cytotoxic immunotherapy adjuvant to up-front surgery and intensive timing radiation for malignant glioma. *Journal of Clinical Oncology*, 29(27), 3611–3619. <https://doi.org/10.1200/JCO.2011.35.5222>
  97. Chiu. (2012). Quality of life in patients with primary and metastatic brain tumors in the literature as assessed by the FACT-Br. *World Journal of Oncology*. <https://doi.org/10.4021/wjon585w>
  98. Chiu, L., Chiu, N., Zeng, L., Zhang, L., Popovic, M., Chow, R., ... Chow, E. (2012, December). Quality of life in patients with primary and metastatic brain cancer as reported in the literature using the

- EORTC QLQ-BN20 and QLQ-C30. *Expert Review of Pharmacoeconomics and Outcomes Research*. <https://doi.org/10.1586/erp.12.70>
99. Choucair, A. K., Scott, C., Urtasun, R., Nelson, D., Mousas, B., & Curran, W. (1997). *QUALITY OF LIFE AND NEUROPSYCHOLOGICAL EVALUATION FOR PATIENTS WITH MALIGNANT ASTROCYTOMAS: RTOG 91-14*. *Int. J. Radiation Oncology Biol. Phys* (Vol. 38). Elsevier Science Inc.
  100. Chow, E., Fan, G., Hadi, S., Wong, J., Kirou-Mauro, A., & Filipczak, L. (2008). Symptom Clusters in Cancer Patients with Brain Metastases. *Clinical Oncology*, 20(1), 76–82. <https://doi.org/10.1016/j.clon.2007.09.007>
  101. Chow, E., Davis, L., Holden, L., Tsao, M., & Danjoux, C. (2005). Prospective assessment of patient-rated symptoms following whole brain radiotherapy for brain metastases. *Journal of Pain and Symptom Management*, 30(1), 18–23. <https://doi.org/10.1016/j.jpainsymman.2005.02.009>
  102. Chow, R., Ray, S., Tsao, M., Pulenzas, N., Zhang, L., Sahgal, A., ... Chow, E. (2016). Quality of life with brain symptom and impact questionnaire in patients with brain metastases. *Annals of Palliative Medicine*, 5(3), 179–189. <https://doi.org/10.21037/apm.2016.04.01>
  103. Chow, R., Tsao, M., Pulenzas, N., Zhang, L., Sahgal, A., Cella, D., ... Chow, E. (2016). Do patients with brain metastases selected for whole brain radiotherapy have worse baseline quality of life as compared to those for radiosurgery or neurosurgery (With or without whole brain radiotherapy)? *Annals of Palliative Medicine*, 5(1), 1–12. <https://doi.org/10.3978/j.issn.2224-5820.2015.11.01>
  104. Cohen, A. L., Anker, C. J., Johnson, B., Burt, L. M., Shrieve, D. C., Salzman, K., ... & Colman, H. (2020). Repeat radiation with bevacizumab and minocycline in bevacizumab-refractory high grade gliomas: a prospective phase 1 trial. *Journal of Neuro-oncology*, 148, 577-585. <https://doi.org/10.1007/s11060-020-03551-3>
  105. Cole, B. F., Gelber, R. D., Gelber, S., & Mukhopadhyay, P. (2004). A Quality-Adjusted Survival (Q-TWiST) Model for Evaluating Treatments for Advanced Stage Cancer. *Journal of Biopharmaceutical Statistics*. <https://doi.org/10.1081/BIP-120028509>
  106. Coomans, M. B., Dirven, L., Aaronson, N. K., Baumert, B. G., Van Den Bent, M., Bottomley, A., ... & Herrlinger, U. (2019). Symptom clusters in newly diagnosed glioma patients: which symptom clusters are independently associated with functioning and global health status?. *Neuro-oncology*, 21(11), 1447-1457.
  107. Coomans, M., Dirven, L., K. Aaronson, N., Baumert, B. G., van den Bent, M., Bottomley, A., ... Taphoorn, M. J. B. (2019). The added value of health-related quality of life as a prognostic indicator of overall survival and progression-free survival in glioma patients: a meta-analysis based on individual patient data from randomised controlled trials. *European Journal of Cancer*, 116, 190–198. <https://doi.org/10.1016/j.ejca.2019.05.012>
  108. Cordes, M. C., Scherwath, A., Ahmad, T., Cole, A. M., Ernst, G., Oppitz, K., ... Steinmann, D. (2014). Distress, anxiety and depression in patients with brain metastases before and after radiotherapy. *BMC Cancer*, 14(1). <https://doi.org/10.1186/1471-2407-14-731>
  109. Correa, D. D., Braun, E., Kryza-Lacombe, M., Ho, K. W., Reiner, A. S., Panageas, K. S., ... & Omuro, A. (2019). Longitudinal cognitive assessment in patients with primary CNS lymphoma treated with induction chemotherapy followed by reduced-dose whole-brain radiotherapy or autologous stem cell transplantation. *Journal of neuro-oncology*, 144(3), 553-562.
  110. Correa, D., DeAngelis, L., Shi, W., Thaler, H., Glass, A., & Abrey, L. (2004). *Cognitive functions in survivors of primary central nervous system lymphoma*.
  111. Correa, D. D., Kryza-Lacombe, M., Baser, R. E., Beal, K., & DeAngelis, L. M. (2016). Cognitive effects of donepezil therapy in patients with brain tumors: a pilot study. *Journal of Neuro-Oncology*, 127(2), 313–319. <https://doi.org/10.1007/s11060-015-2035-3>
  112. Correa, D. D., Shi, W., Abrey, L. E., De Angelis, L. M., Omuro, A. M., Deutsch, M. B., & Thaler, H. T. (2012). Cognitive functions in primary CNS lymphoma after single or combined modality regimens. *Neuro-Oncology*, 14(1), 101–108. <https://doi.org/10.1093/neuonc/nor186>



113. Correa, D. D., Shi, W., Thaler, H. T., Cheung, A. M., DeAngelis, L. M., & Abrey, L. E. (2008). Longitudinal cognitive follow-up in low grade gliomas. *Journal of Neuro-Oncology*, *86*(3), 321–327. <https://doi.org/10.1007/s11060-007-9474-4>
114. Cramarossa, G., Zeng, L., Zhang, L., Tseng, L. M., Hou, M. F., Fairchild, A., ... Chow, E. (2014). Predictive factors of overall quality of life in advanced cancer patients using EORTC QLQ-C30. *Expert Review of Pharmacoeconomics and Outcomes Research*, *14*(1), 139–146. <https://doi.org/10.1586/14737167.2014.864560>
115. Curey, S., Derrey, S., Hannequin, P., Hannequin, D., Fréger, P., Muraine, M., ... Proust, F. (2012). Validation of the superior interhemispheric approach for tuberculum sellae meningioma: Clinical article. *Journal of Neurosurgery*, *117*(6), 1013–1021. <https://doi.org/10.3171/2012.9.JNS12167>
116. Dae, H. L., Han, J. Y., Heung, T. K., Sung, J. Y., Hong, R. P., Kwan, H. C., ... Jin, S. L. (2008). Primary chemotherapy for newly diagnosed nonsmall cell lung cancer patients with synchronous brain metastases compared with whole-brain radiotherapy administered first: Result of a randomized pilot study. *Cancer*, *113*(1), 143–149. <https://doi.org/10.1002/cncr.23526>
117. Daigle, K., Fortin, D., Mathieu, D., Saint-Pierre, A. B., Paré, F. M., De La Sablonnière, A., & Goffaux, P. (2013). Effects of surgical resection on the evolution of quality of life in newly diagnosed patients with glioblastoma: A report on 19 patients surviving to follow-up. *Current Medical Research and Opinion*, *29*(10), 1307–1313. <https://doi.org/10.1185/03007995.2013.823858>
118. De Puyseleir, A., Van De Velde, J., Speleers, B., Vercauteren, T., Goedgebeur, A., Van Hoof, T., ... Ost, P. (2014). Hair-sparing whole brain radiotherapy with volumetric arc therapy in patients treated for brain metastases: Dosimetric and clinical results of a phase II trial. *Radiation Oncology*, *9*(1). <https://doi.org/10.1186/1748-717X-9-170>
119. Dehcordi, S. R., De Paulis, D., Ricci, A., & Cimini, A. (2012). *Survival prognostic factors in patients with glioblastoma: Our experience. Article in Journal of neurosurgical sciences.*
120. Deng, X., Zheng, Z., Lin, B., Su, H., Chen, H., Fei, S., ... Xie, C. Y. (2017). The efficacy and roles of combining temozolomide with whole brain radiotherapy in protection neurocognitive function and improvement quality of life of non-small-cell lung cancer patients with brain metastases. *BMC Cancer*, *17*(1). <https://doi.org/10.1186/s12885-016-3017-3>
121. Diamond, E. L., Prigerson, H. G., Correa, D. C., Reiner, A., Panageas, K., Kryza-Lacombe, M., ... Applebaum, A. J. (2017). Prognostic awareness, prognostic communication, and cognitive function in patients with malignant glioma. *Neuro-Oncology*, *19*(11), 1532–1541. <https://doi.org/10.1093/neuonc/nox117>
122. Díaz, J. L., Barreto, P., Gallego, J. M., Barbero, J., Bayés, R., & Barcia, J. A. (2009). Proper information during the surgical decision-making process lowers the anxiety of patients with high-grade gliomas. *Acta Neurochirurgica*, *151*(4), 357–362. <https://doi.org/10.1007/s00701-009-0195-7>
123. Dinapoli, L., Maschio, M., Jandolo, B., Fabi, A., Pace, A., Sperati, F., & Muti, P. (2009). Quality of life and seizure control in patients with brain tumor-related epilepsy treated with levetiracetam monotherapy: Preliminary data of an open-label study. *Neurological Sciences*, *30*(4), 353–359. <https://doi.org/10.1007/s10072-009-0087-x>
124. Dipierro, F., Simonetti, G., Petrucci, A., Bertuccioli, A., Botta, L., Bruzzone, M. G., ... Lamperti, E. (2019). A novel lecithin-based delivery form of Boswellic acids as complementary treatment of radiochemotherapy-induced cerebral edema in patients with glioblastoma multiforme: A longitudinal pilot experience. *Journal of Neurosurgical Sciences*, *63*(3), 286–291. <https://doi.org/10.23736/S0390-5616.19.04662-9>
125. Dirven, L., Reijneveld, J. C., Taphoorn, M. J. B., Coens, C., El-Badawy, S. A., Tzuk-Shina, T., ... Seidel, C. (2019). Impact of Radiation Target Volume on Health-Related Quality of Life in Patients With Low-Grade Glioma in the 2-Year Period Post Treatment: A Secondary Analysis of the EORTC 22033-26033. *International Journal of Radiation Oncology Biology Physics*, *104*(1), 90–100. <https://doi.org/10.1016/j.ijrobp.2019.01.003>

126. Dirven, L., Van Den Bent, M. J., Bottomley, A., Van Der Meer, N., Van Der Holt, B., Vos, M. J., ... Taphoorn, M. J. B. (2015). The impact of bevacizumab on health-related quality of life in patients treated for recurrent glioblastoma: Results of the randomised controlled phase 2 BELOB trial. *European Journal of Cancer*, *51*(10), 1321–1330. <https://doi.org/10.1016/j.ejca.2015.03.025>
127. Donneau, A. F., Mauer, M., Coens, C., Bottomley, A., & Albert, A. (2014). Longitudinal quality of life data: a comparison of continuous and ordinal approaches. *Quality of Life Research*, *23*(10), 2873–2881. <https://doi.org/10.1007/s11136-014-0730-8>
128. Doolittle, N. D., Korfel, A., Lubow, M. A., Schorb, E., Schlegel, U., Rogowski, S., ... Benjamin Franklin, C. (n.d.). *Long-term cognitive function, neuroimaging, and quality of life in primary CNS lymphoma*.
129. Doyle, M., Bradley, N. M. E., Li, K., Sinclair, E., Lam, K., Chan, G., ... Tsao, M. N. (2007). Quality of life in patients with brain metastases treated with a palliative course of whole-brain radiotherapy. *Journal of Palliative Medicine*, *10*(2), 367–374. <https://doi.org/10.1089/jpm.2006.0202>
130. Drewes, C., Sagberg, L. M., Jakola, A. S., & Solheim, O. (2018). Perioperative and Postoperative Quality of Life in Patients with Glioma—A Longitudinal Cohort Study. *World Neurosurgery*, *117*, e465–e474. <https://doi.org/10.1016/j.wneu.2018.06.052>
131. Drewes, C., Sagberg, L. M., Jakola, A. S., & Solheim, O. (2016). Quality of life in patients with intracranial tumors: Does tumor laterality matter? *Journal of Neurosurgery*, *125*(6), 1400–1407. <https://doi.org/10.3171/2015.12.JNS152252>
132. Dutz, A., Agolli, L., Bütof, R., Valentini, C., Baumann, M., Lühr, A., ... & Krause, M. (2020). Neurocognitive function and quality of life after proton beam therapy for brain tumour patients. *Radiotherapy and Oncology*, *143*, 108–116.
133. Edelstein, K., Coate, L., Massey, C., Jewitt, N. C., Mason, W. P., & Devins, G. M. (2016). Illness intrusiveness and subjective well-being in patients with glioblastoma. *Journal of Neuro-Oncology*, *126*(1), 127–135. <https://doi.org/10.1007/s11060-015-1943-6>
134. Ediebah, D. E., Galindo-Garre, F., Uitdehaag, B. M. J., Ringash, J., Reijneveld, J. C., Dirven, L., ... Taphoorn, M. J. B. (2015). Joint modeling of longitudinal health-related quality of life data and survival. *Quality of Life Research*, *24*(4), 795–804. <https://doi.org/10.1007/s11136-014-0821-6>
135. Ediebah, D. E., Reijneveld, J. C., Taphoorn, M. J. B., Coens, C., Zikos, E., Aaronson, N. K., ... Klein, M. (2017). Impact of neurocognitive deficits on patient–proxy agreement regarding health-related quality of life in low-grade glioma patients. *Quality of Life Research*, *26*(4), 869–880. <https://doi.org/10.1007/s11136-016-1426-z>
136. Edvardsson, T. I., & Ahlström, G. I. (2009). Subjective quality of life in persons with low-grade glioma and their next of kin. *International Journal of Rehabilitation Research*, *32*(1), 64–70. <https://doi.org/10.1097/MRR.0b013e32830bfa8c>
137. Eggen, A. C., Reyners, A. K., Shen, G., Bosma, I., Jalving, M., Leighl, N. B., ... & Edelstein, K. (2020). Death anxiety in patients with metastatic non-small cell lung cancer with and without brain metastases. *Journal of Pain and Symptom Management*, *60*(2), 422–429. <https://doi.org/10.1016/j.jpainsymman.2020.02.023>
138. El-Hamamsy, M., Elwakil, H., Saad, A. S., & Shawki, M. A. (2016). A randomized controlled open-label pilot study of simvastatin addition to whole-brain radiation therapy in patients with brain metastases. *Oncology Research*, *24*(6), 521–528. <https://doi.org/10.3727/096504016X14719078133528>
139. Erharter, A., Giesinger, J., Kemmler, G., Schauer-Maurer, G., Stockhammer, G., Muigg, A., ... Holzner, B. (2010). Implementation of Computer-Based Quality-of-Life Monitoring in Brain Tumor Outpatients in Routine Clinical Practice. *Journal of Pain and Symptom Management*, *39*(2), 219–229. <https://doi.org/10.1016/j.jpainsymman.2009.06.015>
140. Ernst-Stecken, A., Ganslandt, O., Lambrecht, U., Sauer, R., & Grabenbauer, G. (2007). Survival and quality of life after hypofractionated stereotactic radiotherapy for recurrent malignant

- glioma. *Journal of Neuro-Oncology*, 81(3), 287–294. <https://doi.org/10.1007/s11060-006-9231-0>
141. Faarup, I., Lauridsen, J. T., Lütgen, K., Nørregaard, A., Poulsen, F. R., & Østergaard, B. (2019). Do family health conversations impact patients with glioblastoma multiforme and their family members? *Journal of Clinical Nursing*, 28(9–10), 1695–1707. <https://doi.org/10.1111/jocn.14777>
  142. Faithfull, S., & Brada, M. (1998). Somnolence Syndrome in Adults Following Cranial Irradiation for Primary Brain Tumours. *Clinical Oncology*, 10(4), 250-254.
  143. Fariselli, L., Cuppini, L., Gaviani, P., Marchetti, M., Pinzi, V., Milanese, I., ... & Silvani, A. (2017). Short course radiotherapy concomitant with temozolomide in GBM patients: a phase II study. *Tumori Journal*, 103(5), 457-463.
  144. Fernandez, G., Pocinho, R., Travancinha, C., Netto, E., & Roldão, M. (2012). Quality of life and radiotherapy in brain metastasis patients. *Reports of Practical Oncology and Radiotherapy*, 17(5), 281–287. <https://doi.org/10.1016/j.rpor.2012.08.003>
  145. Feuerstein, M., Hansen, J.A., Calvio, L.C., Johnson, L., & Ronquillo, J.G. (2007). *Journal of Occupational and Environmental Medicine*, 49(7), 803-811.
  146. Field, K. M., King, M. T., Simes, J., Espinoza, D., Barnes, E. H., Sawkins, K., ... Nowak, A. K. (2017). Health-related quality of life outcomes from CABARET: a randomized phase 2 trial of carboplatin and bevacizumab in recurrent glioblastoma. *Journal of Neuro-Oncology*, 133(3), 623–631. <https://doi.org/10.1007/s11060-017-2479-8>
  147. Field, K. M., Simes, J., Nowak, A. K., Cher, L., Wheeler, H., Hovey, E. J., ... Neville, A. (2015). Randomized phase 2 study of carboplatin and bevacizumab in recurrent glioblastoma. *Neuro-Oncology*, 17(11), 1504–1513. <https://doi.org/10.1093/neuonc/nov104>
  148. Finocchiaro, C. Y., Petrucci, A., Fedeli, G., Vistalli, M. G., Innocenti, A., Silvani, A., & Lamperti, E. (2017). Hidden reality: sexual sphere in brain tumor patients. *Psychology, Health and Medicine*, 22(3), 370–380. <https://doi.org/10.1080/13548506.2016.1210176>
  149. Flechl, B., Sax, C., Ackerl, M., Crevenna, R., Woehrer, A., Hainfellner, J., ... Hassler, M. R. (2017). The course of quality of life and neurocognition in newly diagnosed patients with glioblastoma. *Radiotherapy and Oncology*, 125(2), 228–233. <https://doi.org/10.1016/j.radonc.2017.07.027>
  150. Flechl, B., Ackerl, M., Sax, C., Dieckmann, K., Crevenna, R., Gaiger, A., ... Marosi, C. (2012). Neurocognitive and sociodemographic functioning of glioblastoma long-term survivors. *Journal of Neuro-Oncology*, 109(2), 331–339. <https://doi.org/10.1007/s11060-012-0897-1>
  151. Fliessbach, K., Helmstaedter, ; C, Urbach, ; H, Althaus, ; A, Pels, ; H, Linnebank, ; M, ... Schlegel, U. (2005). *Neuropsychological outcome after chemotherapy for primary CNS lymphoma A prospective study*.
  152. Fogarty, G. B., Hong, A., Dolven-Jacobsen, K., Reisse, C. H., Burmeister, B., Haydu, L. H., ... Thompson, J. F. (2015). First interim analysis of a randomised trial of whole brain radiotherapy in melanoma brain metastases confirms high data quality. *BMC Research Notes*, 8(1). <https://doi.org/10.1186/s13104-015-1153-5>
  153. Fox, S. W., Lyon, D., & Farace, E. (2007). Symptom clusters in patients with high-grade glioma: Clinical scholarship. *Journal of Nursing Scholarship*, 39(1), 61–67. <https://doi.org/10.1111/j.1547-5069.2007.00144.x>
  154. Fox, S., Laws, E. R., Anderson, F., & Farace, E. (2006). *Complementary Therapy Use and Quality of Life in Persons with High-Grade Gliomas. Journal of Neuroscience Nursing* (Vol. 38).
  155. Freedman, R. A., Gelman, R. S., Wefel, J. S., Melisko, M. E., Hess, K. R., Connolly, R. M., ... Lin, N. U. (2016). Translational breast cancer research consortium (TBCRC) 022: A phase II trial of neratinib for patients with human epidermal growth factor receptor 2-positive breast cancer and brain metastases. *Journal of Clinical Oncology*, 34(9), 945–952. <https://doi.org/10.1200/JCO.2015.63.0343>

156. Fritsch, K., Kasenda, B., Schorb, E., Hau, P., Bloehdorn, J., Möhle, R., ... Illerhaus, G. (2017). High-dose methotrexate-based immuno-chemotherapy for elderly primary CNS lymphoma patients (PRIMA study). *Leukemia*, *31*(4), 846–852. <https://doi.org/10.1038/leu.2016.334>
157. Gabel, N., Altshuler, D. B., Brezzell, A., Briceño, E. M., Boileau, N. R., Miklja, Z., ... Hervey-Jumper, S. L. (2019). Health Related Quality of Life in Adult Low and High-Grade Glioma Patients Using the National Institutes of Health Patient Reported Outcomes Measurement Information System (PROMIS) and Neuro-QOL Assessments. *Frontiers in Neurology*, *10*. <https://doi.org/10.3389/fneur.2019.00212>
158. Gagliardi, F., Bailo, M., Spina, A., Donofrio, C. A., Boari, N., Franzin, A., ... Mortini, P. (2017). Gamma Knife Radiosurgery for Low-Grade Gliomas: Clinical Results at Long-Term Follow-Up of Tumor Control and Patients' Quality of Life. *World Neurosurgery*, *101*, 540–553. <https://doi.org/10.1016/j.wneu.2017.02.041>
159. Gainer, J. L., Sheehan, J. P., Lerner, J. M., & Jones, D. R. (2017). Trans sodium crocetin with temozolomide and radiation therapy for glioblastoma multiforme. *Journal of Neurosurgery*, *126*(2), 460–466. <https://doi.org/10.3171/2016.3.JNS152693>
160. Ganefianty, A., Kariasa, I. M., McAllister, S., Fahmi, I., Sarjono, K., Faried, A., ... Derrett, S. (2019). Quality of Life of Primary Brain Tumor Patients Before and 3 Months After Discharge from a Hospital in Bandung, Indonesia. *Makara Journal of Health Research*, *23*(1). <https://doi.org/10.7454/msk.v23i1.10147>
161. Gao, Y., Gao, F., Ma, J. L., & Zhao, D. L. (2015). Palliative whole-brain radiotherapy and health-related quality of life for patients with brain metastasis in cancer. *Neuropsychiatric Disease and Treatment*, *11*, 2185–2190. <https://doi.org/10.2147/NDT.S87109>
162. Gazzotti, M. R., Malheiros, S. M. F., Batan Alith, M., Nascimento, O., Santoro, I. L., Jardim, J. R., & Vidotto, M. (2011). Quality of life and physical limitations in primary brain tumor patients. *Quality of Life Research*, *20*(10), 1639–1643. <https://doi.org/10.1007/s11136-011-9908-5>
163. Gehring, K., Patwardhan, S. Y., Collins, R., Groves, M. D., Etzel, C. J., Meyers, C. A., & Wefel, J. S. (2012). A randomized trial on the efficacy of methylphenidate and modafinil for improving cognitive functioning and symptoms in patients with a primary brain tumor. *Journal of Neuro-Oncology*, *107*(1), 165–174. <https://doi.org/10.1007/s11060-011-0723-1>
164. Gehring, K., Aaronson, N. K., Gundy, C. M., Taphoorn, M. J. B., & Sitskoorn, M. M. (2011). Predictors of neuropsychological improvement following cognitive rehabilitation in patients with gliomas. *Journal of the International Neuropsychological Society*, *17*(2), 256–266. <https://doi.org/10.1017/S1355617710001530>
165. Gehring, K., Kloek, C. J. J., Aaronson, N. K., Janssen, K. W., Jones, L. W., Sitskoorn, M. M., & Stuiver, M. M. (2018). Feasibility of a home-based exercise intervention with remote guidance for patients with stable grade II and III gliomas: a pilot randomized controlled trial. *Clinical Rehabilitation*, *32*(3), 352–366. <https://doi.org/10.1177/0269215517728326>
166. Gehring, K., Sitskoorn, M. M., Gundy, C. M., Sikkes, S. A. M., Klein, M., Postma, T. J., ... Aaronson, N. K. (2009). Cognitive rehabilitation in patients with gliomas: A randomized, controlled trial. *Journal of Clinical Oncology*, *27*(22), 3712–3722. <https://doi.org/10.1200/JCO.2008.20.5765>
167. Gehring, K., Stuiver, M. M., Visser, E., Kloek, C., van den Bent, M., Hanse, M., ... & Sitskoorn, M. M. (2020). A pilot randomized controlled trial of exercise to improve cognitive performance in patients with stable glioma: a proof of concept. *Neuro-oncology*, *22*(1), 103-115.
168. Gehring, K., Taphoorn, M. J. B., Sitskoorn, M. M., & Aaronson, N. K. (2015). Predictors of subjective versus objective cognitive functioning in patients with stable grades II and III glioma. *Neuro-Oncology Practice*, *2*(1), 20–31. <https://doi.org/10.1093/nop/npu035>
169. Gerber, M., Colledge, F., Pühse, U., Holsboer-Trachsler, E., Zimmerer, S., & Brand, S. (2016). Sleep quality, sleep EEG pattern, mental well-being and cortisol secretion in patients with ruptured aneurysm post-treatment: A comparison with post-surgery meningioma patients and controls. *Neuropsychobiology*, *73*(3), 148–159. <https://doi.org/10.1159/000444492>

170. Gerrard, G. E., Prestwich, R. J., Edwards, A., Russon, L. J., Richards, F., Johnston, C. F., & Kwok-Williams, M. C. (2003). Investigating the palliative efficacy of whole-brain radiotherapy for patients with multiple-brain metastases and poor prognostic features. *Clinical Oncology*, *15*(7), 422–428. [https://doi.org/10.1016/S0936-6555\(03\)00148-1](https://doi.org/10.1016/S0936-6555(03)00148-1)
171. Giesinger, J. M., Golser, M., Erharter, A., Kemmler, G., Schauer-Maurer, G., Stockhammer, G., ... Holzner, B. (2009). Do neurooncological patients and their significant others agree on quality of life ratings? *Health and Quality of Life Outcomes*, *7*. <https://doi.org/10.1186/1477-7525-7-87>
172. Gilbert, M. R., Dignam, J. J., Armstrong, T. S., Wefel, J. S., Blumenthal, D. T., Vogelbaum, M. A., ... Mehta, M. P. (2014). A randomized trial of bevacizumab for newly diagnosed glioblastoma. *New England Journal of Medicine*, *370*(8), 699–708. <https://doi.org/10.1056/NEJMoa1308573>
173. Giovagnoli, A. R., Silvani, A., Colombo, E., & Boiardi, A. (2005). Facets and determinants of quality of life in patients with recurrent high grade glioma. *Journal of Neurology, Neurosurgery and Psychiatry*, *76*(4), 562–568. <https://doi.org/10.1136/jnnp.2004.036186>
174. Giovagnoli, A. R. (n.d.). *Quality of life in patients with stable disease after surgery, radiotherapy, and chemotherapy for malignant brain tumour*.
175. Giovagnoli, A. R., Meneses, R. F., Silvani, A., Milanesi, I., Fariselli, L., Salmaggi, A., & Boiardi, A. (2014). Quality of life and brain tumors: What beyond the clinical burden? *Journal of Neurology*, *261*(5), 894–904. <https://doi.org/10.1007/s00415-014-7273-3>
176. Giovagnoli, A. R., Tamburini, M., & Boiardi, A. (1996). *Quality of life in brain tumor patients*. *Journal of Neuro-Oncology* (Vol. 30).
177. Gleason, J. F., Case, D., Rapp, S. T., Ip, E., Naughton, M., Butler, J. M., ... Shaw, E.G. (2007). Symptom Clusters in Patients With Newly-Diagnosed Brain Tumors. *The Journal of Supportive Oncology*, *5*(9), 427-436.
178. Goebel, S., Stark, A. M., Kaup, L., Von Harscher, M., & Mehdorn, H. M. (2011). Distress in patients with newly diagnosed brain tumours. *Psycho-Oncology*, *20*(6), 623–630. <https://doi.org/10.1002/pon.1958>
179. Goebel, S., Mederer, D., & Mehdorn, H. M. (2018). Surgery-Related Coping in Surgery Patients with Intracranial Tumors. *World Neurosurgery*, *116*, e775–e782. <https://doi.org/10.1016/j.wneu.2018.05.091>
180. Goebel, S., & Mehdorn, H. M. (2011). Measurement of psychological distress in patients with intracranial tumours: The NCCN distress thermometer. *Journal of Neuro-Oncology*, *104*(1), 357–364. <https://doi.org/10.1007/s11060-010-0501-5>
181. Goebel, S., Mehdorn, H. M., & Wiesner, C. D. (2018). Social cognition in patients with intracranial tumors: do we forget something in the routine neuropsychological examination? *Journal of Neuro-Oncology*, *140*(3), 687–696. <https://doi.org/10.1007/s11060-018-3000-8>
182. Goebel, S., & Mehdorn, H. M. (2018). Breaking Bad News to Patients with Intracranial Tumors: The Patients' Perspective. *World Neurosurgery*, *118*, e254–e262. <https://doi.org/10.1016/j.wneu.2018.06.168>
183. Goebel, S., & Mehdorn, H. M. (2019). Fear of disease progression in adult ambulatory patients with brain cancer: prevalence and clinical correlates. *Supportive Care in Cancer*, *27*(9), 3521–3529. <https://doi.org/10.1007/s00520-019-04665-9>
184. Goebel, S., Strenge, H., & Mehdorn, H. M. (2012). Acute stress in patients with brain cancer during primary care. *Supportive Care in Cancer*, *20*(7), 1425–1434. <https://doi.org/10.1007/s00520-011-1225-6>
185. Goebel, S., Von Harscher, M., & Maximilian Mehdorn, H. (2011). Comorbid mental disorders and psychosocial distress in patients with brain tumours and their spouses in the early treatment phase. *Supportive Care in Cancer*, *19*(11), 1797–1805. <https://doi.org/10.1007/s00520-010-1021-8>
186. Goffaux, P., Boudrias, M., Mathieu, D., Charpentier, C., Veilleux, N., & Fortin, D. (2009). Development of a concise QOL questionnaire for brain tumor patients. *Canadian Journal of Neurological Sciences*, *36*(3), 340–348. <https://doi.org/10.1017/S0317167100007095>

187. Golla, H., Ale Ahmad, M., Galushko, M., Hampl, J., Maarouf, M., Schroeter, M., ... Voltz, R. (2014). Glioblastoma multiforme from diagnosis to death: a prospective, hospital-based, cohort, pilot feasibility study of patient reported symptoms and needs. *Supportive Care in Cancer*, 22(12), 3341–3352. <https://doi.org/10.1007/s00520-014-2384-z>
188. Gondi, V., Pugh, S. L., Tome, W. A., Caine, C., Corn, B., Kanner, A., ... Mehta, M. P. (2014). Preservation of memory with conformal avoidance of the hippocampal neural stem-cell compartment during whole-brain radiotherapy for brain metastases (RTOG 0933): A phase II multi-institutional trial. *Journal of Clinical Oncology*, 32(34), 3810–3816. <https://doi.org/10.1200/JCO.2014.57.2909>
189. Grabenbauer, G. G., Gerber, K. D., Ganslandt, O., Richter, A., Klautke, G., Birkmann, J., & Meyer, M. (2009). Effects of Concurrent Topotecan and Radiation on 6-Month Progression-Free Survival in the Primary Treatment of Glioblastoma Multiforme. *International Journal of Radiation Oncology Biology Physics*, 75(1), 164–169. <https://doi.org/10.1016/j.ijrobp.2009.04.015>
190. Graham, P. H., Bucci, J., & Browne, L. (2010). Randomized Comparison of Whole Brain Radiotherapy, 20 Gy in Four Daily Fractions Versus 40 Gy in 20 Twice-Daily Fractions, for Brain Metastases. *International Journal of Radiation Oncology Biology Physics*, 77(3), 648–654. <https://doi.org/10.1016/j.ijrobp.2009.05.032>
191. Gregg, N., Arber, A., Ashkan, K., Brazil, L., Bhangoo, R., Beaney, R., ... Yágüez, L. (2014). Neurobehavioural changes in patients following brain tumour: patients and relatives perspective. *Supportive Care in Cancer*, 22(11), 2965–2972. <https://doi.org/10.1007/s00520-014-2291-3>
192. Grønberg, B. H., Ciuleanu, T., Fløtten, Ø., Knuutila, A., Abel, E., Langer, S. W., ... Sundstrøm, S. (2012). A placebo-controlled, randomized phase II study of maintenance enzastaurin following whole brain radiation therapy in the treatment of brain metastases from lung cancer. *Lung Cancer*, 78(1), 63–69. <https://doi.org/10.1016/j.lungcan.2012.07.007>
193. Groß, M. W., Altscher, R., Brandtner, M., Häußler-Mischlich, H., Kiricuta, I. C., Siegmann, A. D., & Engenhart-Cabillic, R. (2001). Strahlentherapie und Onkologie Acute Toxicity and Changes in Quality of Life during a Combined Radio-Chemotherapy of Glioblastomas with Topotecan (Hycamtin®). *Strahlenther Onkol*, 177(12), 656–661. <https://doi.org/10.1007/s00066-001-0815-5>
194. Guedes de Castro, D., Matiello, J., Roa, W., Ghosh, S., Kepka, L., Kumar, N., ... Fidarova, E. (2017). Survival Outcomes With Short-Course Radiation Therapy in Elderly Patients With Glioblastoma: Data From a Randomized Phase 3 Trial. *International Journal of Radiation Oncology Biology Physics*, 98(4), 931–938. <https://doi.org/10.1016/j.ijrobp.2017.03.037>
195. Guenther, F., Swozil, F., Heber, S., Buchfelder, M., Messlinger, K., & Fischer, M. J. M. (2019). Pre- and postoperative headache in patients with meningioma. *Cephalalgia*, 39(4), 533–543. <https://doi.org/10.1177/0333102418793636>
196. Guerdoux-Ninot, E., Bauchet, L., Sop, F. Y. L., Gourgou, S., Gomez, A., Gerazime, A., ... & Ninot, G. (2020). Prospective memory and brain metastases: a relevant target for rehabilitation in post-operative patients?. *Journal of Neuro-Oncology*, 147, 185-194.
197. Guha-Thakurta, N., Damek, D., Pollack, C., & Hochberg, F. H. (1999). *Intravenous methotrexate as initial treatment for primary central nervous system lymphoma: Response to therapy and quality of life of patients* \*. *Journal of Neuro-Oncology* (Vol. 43).
198. Gustafsson, M., Edvardsson, T., & Ahlström, G. (2006). The relationship between function, quality of life and coping in patients with low-grade gliomas. *Supportive Care in Cancer*, 14(12), 1205–1212. <https://doi.org/10.1007/s00520-006-0080-3>
199. Habets, E. J. J., Dirven, L., Wiggenraad, R. G., Verbeek-De Kanter, A., Lycklama À Nijeholt, G. J., Zwinkels, H., ... Taphoorn, M. J. B. (2016). Neurocognitive functioning and health-related quality of life in patients treated with stereotactic radiotherapy for brain metastases: A prospective study. *Neuro-Oncology*, 18(3), 435–444. <https://doi.org/10.1093/neuonc/nov186>



200. Habets, E. J. J., Taphoorn, M. J. B., Nederend, S., Klein, M., Delgadillo, D., Hoang-Xuan, K., ... Reijneveld, J. C. (2014). Health-related quality of life and cognitive functioning in long-term anaplastic oligodendroglioma and oligoastrocytoma survivors. *Journal of Neuro-Oncology*, *116*(1), 161–168. <https://doi.org/10.1007/s11060-013-1278-0>
201. Hahn, C. A., Dunn, R. H., Logue, P. E., King, J. H., Edwards, C. L., & Halperin, E. C. (2003). Prospective study of neuropsychologic testing and quality-of-life assessment of adults with primary malignant brain tumors. *International Journal of Radiation Oncology Biology Physics*, *55*(4), 992–999. [https://doi.org/10.1016/S0360-3016\(02\)04205-0](https://doi.org/10.1016/S0360-3016(02)04205-0)
202. Halkett, G. K. B., Lobb, E. A., Rogers, M. M., Shaw, T., Long, A. P., Wheeler, H. R., & Nowak, A. K. (2015). Predictors of distress and poorer quality of life in High Grade Glioma patients. *Patient Education and Counseling*, *98*(4), 525–532. <https://doi.org/10.1016/j.pec.2015.01.002>
203. Hall, W. A., Pugh, S. L., Wefel, J. S., Armstrong, T. S., Gilbert, M. R., Brachman, D. G., ... & Roof, K. S. (2019). Influence of residual disease following surgical resection in newly diagnosed glioblastoma on clinical, neurocognitive, and patient reported outcomes. *Neurosurgery*, *84*(1), 66-76.
204. Hansen, A., Pedersen, C. B., Jarden, J. O., Beier, D., Minet, L. R., & Sjøgaard, K. (2020). Effectiveness of physical therapy–and occupational therapy–based rehabilitation in people who have glioma and are undergoing active anticancer treatment: single-blind, randomized controlled trial. *Physical Therapy*, *100*(3), 564-574.
205. Hansen, A., Pedersen, C. B., Minet, L. R., Beier, D., Jarden, J. O., & Sjøgaard, K. (2019). Hemispheric tumor location and the impact on health-related quality of life, symptomatology, and functional performance outcomes in patients with glioma: an exploratory cross-sectional study. *Disability and Rehabilitation*. <https://doi.org/10.1080/09638288.2019.1668486>
206. Haraldseide, L. M., Jakola, A. S., Solheim, O., & Sagberg, L. M. (2020). Does preoperative health-related quality of life predict survival in high-grade glioma patients?—a prospective study. *British Journal of Neurosurgery*, *34*(1), 28-34.
207. Harder, H., Holtel, ; H, Bromberg, ; J E C, Poortmans, ; P, Haaxma-Reiche, ; H, Kluin-Nelemans, ; H C, ... Van Den Bent, M. J. (2004). *Cognitive status and quality of life after treatment for primary CNS lymphoma*.
208. Hassler, M., Micksche, M., Stockhammer, G., Pichler, J., Payer, F., Abuja, B., ... Marosi, C. (2006). Temozolomide for recurrent or progressive high-grade malignant glioma: Results of an Austrian multicenter observational study. *Wiener Klinische Wochenschrift*, *118*(7–8), 230–238. <https://doi.org/10.1007/s00508-006-0576-3>
209. Hau, P., Kunz-Schughart, L., Bogdahn, U., Baumgart, U., Hirschmann, B., Weimann, E., ... Reichle, A. (2008). Low-dose chemotherapy in combination with COX-2 inhibitors and PPAR-gamma agonists in recurrent high-grade gliomas - A phase II study. *Oncology*, *73*(1–2), 21–25. <https://doi.org/10.1159/000120028>
210. Hau, P., Baumgart, U., Pfeifer, K., Bock, A., Jauch, T., Dietrich, J., ... Steinbrecher, A. (2003). Salvage Therapy in Patients with Glioblastoma: Is There any Benefit? *Cancer*, *98*(12), 2678–2686. <https://doi.org/10.1002/cncr.11845>
211. Hau, P., Fabel, K., Baumgart, U., Rümmele, P., Grauer, O., Bock, A., ... Bogdahn, U. (2004). Pegylated Liposomal Doxorubicin-Efficacy in Patients with Recurrent High-Grade Glioma. *Cancer*, *100*(6), 1199–1207. <https://doi.org/10.1002/cncr.20073>
212. Henriksson, R., Capala, J., Michanek, A., Lindahl, S. Å., Salford, L. G., Franzén, L., ... Bergenheim, A. T. (2008). Boron neutron capture therapy (BNCT) for glioblastoma multiforme: A phase II study evaluating a prolonged high-dose of boronophenylalanine (BPA). *Radiotherapy and Oncology*, *88*(2), 183–191. <https://doi.org/10.1016/j.radonc.2006.04.015>
213. Henriksson, R., Malmström, A., Bergström, P., Bergh, G., Trojanowski, T., Andreasson, L., ... Bergenheim, A. T. (2006). High-grade astrocytoma treated concomitantly with estramustine and radiotherapy. *Journal of Neuro-Oncology*, *78*(3), 321–326. <https://doi.org/10.1007/s11060-005-9106-9>

214. Henzel, M., Fokas, E., Sitter, H., Wittig, A., & Engenhart-Cabillic, R. (2013). Quality of life after stereotactic radiotherapy for meningioma: A prospective non-randomized study. *Journal of Neuro-Oncology*, *113*(1), 135–141. <https://doi.org/10.1007/s11060-013-1099-1>
215. Herrlinger, U., Küker, W., Uhl, M., Blaicher, H. P., Karnath, H. O., Kanz, L., ... Weller, M. (2005). NOA-03 trial of high-dose methotrexate in primary central nervous system lymphoma: Final report. *Annals of Neurology*, *57*(6), 843–847. <https://doi.org/10.1002/ana.20495>
216. Herrlinger, U., Schäfer, N., Fimmers, R., Griesinger, F., Rauch, M., Kirchen, H., ... Weller, M. (2017). Early whole brain radiotherapy in primary CNS lymphoma: negative impact on quality of life in the randomized G-PCNSL-SG1 trial. *Journal of Cancer Research and Clinical Oncology*, *143*(9), 1815–1821. <https://doi.org/10.1007/s00432-017-2423-5>
217. Herrlinger, U., Schäfer, N., Steinbach, J. P., Weyerbrock, A., Hau, P., Goldbrunner, R., ... Glas, M. (2016). Bevacizumab Plus irinotecan versus temozolomide in newly diagnosed O6-methylguanine-DNA methyltransferase nonmethylated glioblastoma: The randomized GLARIUS trial. *Journal of Clinical Oncology*, *34*(14), 1611–1619. <https://doi.org/10.1200/JCO.2015.63.4691>
218. Hickmann, A. K., Nadji-Ohl, M., Haug, M., Hopf, N. J., Ganslandt, O., Giese, A., & Renovanz, M. (2016). Suicidal ideation, depression, and health-related quality of life in patients with benign and malignant brain tumors: a prospective observational study in 83 patients. *Acta Neurochirurgica*, *158*(9), 1669–1682. <https://doi.org/10.1007/s00701-016-2844-y>
219. Hickmann, A.-K. (n.d.). Evaluating patients for psychosocial distress and supportive, *131*. <https://doi.org/10.1007/s11060-016-2280-0/Published>
220. Hird, A., Wong, J., Zhang, L., Tsao, M., Barnes, E., Danjoux, C., & Chow, E. (2010). Exploration of symptoms clusters within cancer patients with brain metastases using the Spitzer quality of life index. *Supportive Care in Cancer*, *18*(3), 335–342. <https://doi.org/10.1007/s00520-009-0657-8>
221. Hiromitsu, K., Asai, T., Saito, S., Shigemune, Y., Hamamoto, K., Shinoura, N., ... Midorikawa, A. (2018). Measuring the sense of self in brain-damaged patients: A STROBE-compliant article. *Medicine (United States)*, *97*(36). <https://doi.org/10.1097/MD.00000000000012156>
222. Honeybul, S., Neil-Dwyer, G., Lang, D. A., Evans, B. T., & Ellison, D. W. (2001). Clinical Articles Sphenoid Wing Meningioma en Plaque: A Clinical Review. *Acta Neurochirurgica*, *143*, 749–758.
223. Hovey, E. J., Field, K. M., Rosenthal, M. A., Barnes, E. H., Cher, L., Nowak, A. K., ... Whelan, M. (2017). Continuing or ceasing bevacizumab beyond progression in recurrent glioblastoma: An exploratory randomized phase II trial. *Neuro-Oncology Practice*, *4*(3), 171–181. <https://doi.org/10.1093/nop/npw025>
224. Hurvitz, S. A., O'Shaughnessy, J., Mason, G., Yardley, D. A., Jahanzeb, M., Brufsky, A., ... Cobleigh, M. (2019). Central nervous system metastasis in patients with HER2-positive metastatic breast cancer: Patient characteristics, treatment, and survival from systhers. *Clinical Cancer Research*, *25*(8), 2433–2441. <https://doi.org/10.1158/1078-0432.CCR-18-2366>
225. Hutterer, M., Nowosielski, M., Haybaeck, J., Embacher, S., Stockhammer, F., Gotwald, T., ... Stockhammer, G. (2014). A single-arm phase II Austrian/German multicenter trial on continuous daily sunitinib in primary glioblastoma at first recurrence (SURGE 01-07). *Neuro-Oncology*, *16*(1), 92–102. <https://doi.org/10.1093/neuonc/not161>
226. Ijzerman-Korevaar, M., Snijders, T. J., Teunissen, S. C. C. M., De Graeff, A., & De Vos, F. Y. F. (2018). Symptom Monitoring in Glioma Patients: Development of the Edmonton Symptom Assessment System Glioma Module. *Journal of Neuroscience Nursing*, *50*(6), 381–387. <https://doi.org/10.1097/JNN.0000000000000400>
227. Jacobs, D. I., Kumthekar, P., Stell, B. V., Grimm, S. A., Rademaker, A. W., Rice, L., ... Raizer, J. J. (2014). Concordance of patient and caregiver reports in evaluating quality of life in patients with malignant gliomas and an assessment of caregiver burden. *Neuro-Oncology Practice*, *1*(2), 47–54. <https://doi.org/10.1093/nop/npu004>



228. Jagannathan, J., Petit, J. H., Balsara, K., Hudes, R., & Chin, L. S. (2004). Long-Term Survival After Gamma Knife Radiosurgery for Primary and Metastatic Brain Tumors. *American Journal of Clinical Oncology*, 27(5), 441- 444.
229. Jakola, A. S., Gulati, M., Gulati, S., & Solheim, O. (2012). The influence of surgery on quality of life in patients with intracranial meningiomas: A prospective study. *Journal of Neuro-Oncology*, 110(1), 137–144. <https://doi.org/10.1007/s11060-012-0947-8>
230. Jakola, A. S., Gulati, S., Weber, C., Unsgård, G., & Solheim, O. (2011). Postoperative deterioration in health related quality of life as predictor for survival in patients with glioblastoma: A prospective study. *PLoS ONE*, 6(12). <https://doi.org/10.1371/journal.pone.0028592>
231. Jakola, A. S., Sagberg, L. M., Gulati, S., & Solheim, O. (2015). Perioperative quality of life in functionally dependent glioblastoma patients: A prospective study. *British Journal of Neurosurgery*, 29(6), 843–849. <https://doi.org/10.3109/02688697.2015.1054355>
232. Jakola, A. S., Unsgård, G., & Solheim, O. (2011). Quality of life in patients with intracranial gliomas: The impact of modern image-guided surgery. Clinical article. *Journal of Neurosurgery*, 114(6), 1622–1630. <https://doi.org/10.3171/2011.1.JNS101657>
233. Jakola, A. S., Unsgård, G., Myrmed, K. S., Kloster, R., Torp, S. H., Lindal, S., & Solheim, O. (2012). Low Grade Gliomas in Eloquent Locations - Implications for Surgical Strategy, Survival and Long Term Quality of Life. *PLoS ONE*, 7(12). <https://doi.org/10.1371/journal.pone.0051450>
234. Jakola, A. S., Unsgård, G., Myrmed, K. S., Kloster, R., Torp, S. H., Sagberg, L. M., ... Solheim, O. (2014). Surgical strategies in low-grade gliomas and implications for long-term quality of life. *Journal of Clinical Neuroscience*, 21(8), 1304–1309. <https://doi.org/10.1016/j.jocn.2013.11.027>
235. Jakola, A. S., Solheim, O., Gulati, S., & Sagberg, L. M. (2017). Is there a response shift in generic health-related quality of life 6 months after glioma surgery? *Acta Neurochirurgica*, 159(2), 377–384. <https://doi.org/10.1007/s00701-016-3040-9>
236. Janda, M., Steginga, S., Langbecker, D., Dunn, J., Walker, D., & Eakin, E. (2007). Quality of life among patients with a brain tumor and their carers. *Journal of Psychosomatic Research*, 63(6), 617–623. <https://doi.org/10.1016/j.jpsychores.2007.06.018>
237. Jason, G. W., Pajurkova, E. M., Taenzer, P. A., & Bultz, B. D. (1997). Acute effects on neuropsychological function and quality of life by high-dose multiple daily fractionated radiotherapy for malignant astrocytomas: Assessing the tolerability of a new radiotherapy regimen. *Psycho-Oncology*, 6(2), 151–157. [https://doi.org/10.1002/\(SICI\)1099-1611\(199706\)6:2<151::AID-PON244>3.0.CO;2-G](https://doi.org/10.1002/(SICI)1099-1611(199706)6:2<151::AID-PON244>3.0.CO;2-G)
238. Jenkins, L. M., Drummond, K. J., & Andrewes, D. G. (2016). Emotional and personality changes following brain tumour resection. *Journal of Clinical Neuroscience*, 29, 128–132. <https://doi.org/10.1016/j.jocn.2015.12.007>
239. Jiang, C., & Wang, J. (2019). Post-traumatic stress disorders in patients with low-grade glioma and its association with survival. *Journal of Neuro-Oncology*, 142(2), 385–392. <https://doi.org/10.1007/s11060-019-03112-3>
240. Johannesen, T. B., Lien, H. H., Hole, K. H., & Lote, K. (2003). Radiological and clinical assessment of long-term brain tumour survivors after radiotherapy. *Radiotherapy and Oncology*, 69(2), 169–176. [https://doi.org/10.1016/S0167-8140\(03\)00192-0](https://doi.org/10.1016/S0167-8140(03)00192-0)
241. Jones, D., Cerhan, J. H., Butts, A. M., Syrjanen, J. A., Aakre, J. A., Paul, ;, ... Roberts, O. (2019). *Dow Jones Factiva Factors Associated With Meningioma Detected in a Population-Based Sample*.
242. Jones, L. W., Cohen, R. R., Mabe, S. K., West, M. J., Desjardins, A., Vredenburgh, J. J., ... Friedman, H. S. (2009). Assessment of physical functioning in recurrent glioma: Preliminary comparison of performance status to functional capacity testing. *Journal of Neuro-Oncology*, 94(1), 79–85. <https://doi.org/10.1007/s11060-009-9803-x>
243. Jones, L. W., Friedman, A. H., West, M. J., Mabe, S. K., Fraser, J., Kraus, W. E., ... Reardon, D. A. (2010). Quantitative assessment of cardiorespiratory fitness, skeletal muscle function, and body composition in adults with primary malignant glioma. *Cancer*, 116(3), 695–704. <https://doi.org/10.1002/cncr.24808>

244. Jones, L. W., Mourtzakis, M., Peters, K. B., Friedman, A. H., West, M. J., Mabe, S. K., ... Reardon, D. A. (2010). Changes in Functional Performance Measures in Adults Undergoing Chemoradiation for Primary Malignant Glioma: A Feasibility Study. *The Oncologist*, *15*(6), 636–647. <https://doi.org/10.1634/theoncologist.2009-0265>
245. Jones, S. H., Iannone, A. F., Patel, K. S., Anchouche, K., Raza, S. M., Anand, V. K., & Schwartz, T. H. (2016). The Impact of Age on Long-Term Quality of Life after Endonasal Endoscopic Resection of Skull Base Meningiomas. *Neurosurgery*, *79*(5), 736–745. <https://doi.org/10.1227/NEU.0000000000001360>
246. Juergens, A., Pels, H., Rogowski, S., Fliessbach, K., Glasmacher, A., Engert, A., ... Schlegel, U. (2010). Long-term survival with favorable cognitive outcome after chemotherapy in primary central nervous system lymphoma. *Annals of Neurology*, *67*(2), 182–189. <https://doi.org/10.1002/ana.21824>
247. Kadasheva, A. B., Cherekaev, V. A., Shifrin, M. A., Kozlov, A. V., Gol'bin, D. A., Tsukanova, T. V., ... & Radchenkov, N. S. (2015). Life quality of patients with benign tumors of the anterior and middle part of the skull base after surgery and during follow-up. *Zhurnal voprosy neirokhirurgii imeni NN Burdenko*, *79*(2), 44-54.
248. Kalkanis, S. N., Quinones-Hinojosa, A., Buzney, E., Ribaud, H. J., & Black, P. M. (2000). Quality of Life Following Surgery for Intracranial Meningiomas at Brigham and Women's Hospital: A Study of 164 Patients Using a Modification of the Functional Assessment of Cancer Therapy–brain Questionnaire. *Journal of neuro-oncology*, *48*(3), 233-241.
249. Kamińska, M., Fersten, E., Koziara, H., & Królicki, B. (2017). Quality of life in patients with brain tumors in the course of alpha therapy. *Journal of Psychosocial Oncology*, *35*(5), 631–644. <https://doi.org/10.1080/07347332.2017.1340390>
250. Kangas, M., Williams, J. R., & Smee, R. I. (2012). The Association Between Post-traumatic Stress and Health-Related Quality of Life in Adults Treated for a Benign Meningioma. *Applied Research in Quality of Life*, *7*(2), 163–182. <https://doi.org/10.1007/s11482-011-9159-1>
251. Kangas, M., Williams, J. R., & Smee, R. I. (2011). Benefit Finding in Adults Treated for Benign Meningioma Brain Tumours: Relations with Psychosocial Wellbeing. *Brain Impairment*, *12*(2), 105–116. <https://doi.org/10.1375/brim.12.2.105>
252. Kaplan, C. P. (2001). The community integration questionnaire with new scoring guidelines: Concurrent validity and need for appropriate norms. *Brain Injury*, *15*(8), 725–731. <https://doi.org/10.1080/02699050010005913>
253. Kaplan, C. P., & Phd. (n.d.). *Community Integration Questionnaire for Patients with Brain Tumor: A Comparative Study*. *Journal of Physical Medicine & Rehabilitation* (Vol. 79).
254. Kaplan, C. P., & Miner, M. E. (2000). Relationships: Importance for patients with cerebral tumours. *Brain Injury*, *14*(3), 251–259. <https://doi.org/10.1080/026990500120727>
255. Karaca, F., Cavus, G., Afsar, C. U., Mentis, S., Sertdemir, Y., & Gezercan, Y. (2019). Syrian migrants with brain metastasis patients: Quality of life and anxiety before radiotherapy, depression before and after radiotherapy and the effect on familial relatives. *Eastern Journal of Medicine*, *24*(4), 412-421.
256. Karsy, M., Jensen, M. R., Guan, J., Ravindra, V. M., Bisson, E. F., & Couldwell, W. T. (2019). Eq-5d quality-of-life analysis and cost-effectiveness after skull base meningioma resection. *Clinical Neurosurgery*, *85*(3), E543–E552. <https://doi.org/10.1093/neuros/nyz040>
257. Keeling, M., Bambrough, J., & Simpson, J. (2013). Depression, anxiety and positive affect in people diagnosed with low-grade tumours: The role of illness perceptions. *Psycho-Oncology*, *22*(6), 1421–1427. <https://doi.org/10.1002/pon.3158>
258. Keilani, M., Krall, C., Marosi, C., Flechl, B., Dieckmann, K., Widhalm, G., ... Crevenna, R. (2012). Strength of skeletal muscle and self-reported physical performance in Austrian glioblastoma-patients. *Wiener Klinische Wochenschrift*, *124*(11–12), 377–383. <https://doi.org/10.1007/s00508-012-0186-1>

259. Keime-Guibert, F., Chinot, O., Cartalat-Carel, S., Frenay, M., Kantor, G., Guillamo, J.-S., ... Pitié-Salpêtrière, H. (2007). *Radiotherapy for Glioblastoma in the Elderly for the Association of French-Speaking Neuro-Oncologists\* A B S T R A C T*.
260. Keir, S. T., Farland, M. M., Lipp, E. S., & Friedman, H. S. (n.d.). *Family Appraisal of Caregiving in a Brain Cancer Model*.
261. Keir, S. T., Guill, A. B., Carter, K. E., & Friedman, H. S. (2006). Stress and intervention preferences of patients with brain tumors. *Supportive Care in Cancer*, 14(12), 1213–1219. <https://doi.org/10.1007/s00520-006-0087-9>
262. Keir, S. T. (2011). Effect of massage therapy on stress levels and quality of life in brain tumor patients - Observations from a pilot study. *Supportive Care in Cancer*, 19(5), 711–715. <https://doi.org/10.1007/s00520-010-1032-5>
263. Keir, S. T., & Saling, J. R. (2012). Pilot study of the impact of massage therapy on sources and levels of distress in brain tumour patients. *BMJ Supportive and Palliative Care*, 2(4), 363–366. <https://doi.org/10.1136/bmjspcare-2012-000224>
264. Kepka, L., Tyc-Szczepaniak, D., Osowiecka, K., Sprawka, A., Trąbska-Kluch, B., & Czeremczynska, B. (2018). Quality of life after whole brain radiotherapy compared with radiosurgery of the tumor bed: results from a randomized trial. *Clinical and Translational Oncology*, 20(2), 150–159. <https://doi.org/10.1007/s12094-017-1703-5>
265. Kerba, M., Foro, P., Danielson, B., Lam, K., & Chow, E. (2015). Social determinants of quality of life in advanced cancer patients with brain metastases undergoing palliative radiotherapy. *Journal of Pain Management*, 8(3), 243.
266. Khan, F., & Amatya, B. (2013). Factors associated with long-term functional outcomes, psychological sequelae and quality of life in persons after primary brain tumour. *Journal of Neuro-Oncology*, 111(3), 355–366. <https://doi.org/10.1007/s11060-012-1024-z>
267. Khan, F., & Amatya, B. (2013). Use of the international Classification of Functioning, Disability and Health (ICF) to describe patient -reported disability in primary brain tumour in an Australian community cohort. *Journal of Rehabilitation Medicine*, 45(5), 434–445. <https://doi.org/10.2340/16501977-1132>
268. Khan, F., Amatya, B., Drummond, K., & Galea, M. (2014, September 1). Effectiveness of integrated multidisciplinary rehabilitation in primary brain cancer survivors in an Australian community cohort: A controlled clinical trial. *Journal of Rehabilitation Medicine*. Foundation for Rehabilitation Information. <https://doi.org/10.2340/16501977-1840>
269. Khan, L., Cramarossa, G., Lemke, M., Nguyen, J., Zhang, L., Chen, E., & Chow, E. (2013). Symptom clusters using the Spitzer quality of life index in patients with brain metastases - A reanalysis comparing different statistical methods. *Supportive Care in Cancer*, 21(2), 467–473. <https://doi.org/10.1007/s00520-012-1540-6>
270. Khan, R. B., Raizer, J. J., Malkin, M. G., Bazylewicz, K. A., & Abrey, L. E. (2002). *A phase II study of extended low-dose temozolomide in recurrent malignant gliomas*. *Neuro-Oncology* (Vol. 4).
271. Khatri, D., Jaiswal, A., Das, K. K., Pandey, S., Bhaishora, K., & Kumar, R. (2019). Health-related quality of life after surgery in supratentorial gliomas. *Neurology India*, 67(2), 467–475. <https://doi.org/10.4103/0028-3886.257998>
272. Khoshnevisan, A., Yekaninejad, M. S., Ardakani, S. K., Pakpour, A. H., Mardani, A., & Aaronson, N. K. (2012). Translation and validation of the EORTC brain cancer module (EORTC QLQ-BN20) for use in Iran. *Health and Quality of Life Outcomes*, 10. <https://doi.org/10.1186/1477-7525-10-54>
273. Kiebert, G. M., Curran, D., Aaronson, N. K., Bolla, M., Menten, J., Rutten, E. H. J. M., ... Karim, A. B. M. F. (1902). *Original Paper Quality of Life after Radiation Therapy of Cerebral Low-grade Gliomas of the Adult: Results of a Randomised Phase III Trial on Dose Response (EORTC Trial 22844)*. *Eur J Cancer* (Vol. 34).

274. Kilbride, L., Smith, G., & Grant, R. (2007). The frequency and cause of anxiety and depression amongst patients with malignant brain tumours between surgery and radiotherapy. *Journal of Neuro-Oncology*, 84(3), 297–304. <https://doi.org/10.1007/s11060-007-9374-7>
275. Kim, A. H., Tatter, S., Rao, G., Prabhu, S., Chen, C., Fecci, P., ... & Judy, K. (2020). Laser Ablation of Abnormal Neurological Tissue Using Robotic NeuroBlate System (LAANTERN): 12-Month Outcomes and Quality of Life After Brain Tumor Ablation. *Neurosurgery*, 87(3), E338-E346. <https://doi.org/10.1093/neuros/nyaa071>
276. Kim, C.-W., Joo, J.-D., Kim, Y.-H., Han, J. H., & Kim, C.-Y. (2016). Health-Related Quality of Life in Brain Tumor Patients Treated with Surgery: Preliminary Result of a Single Institution. *Brain Tumor Research and Treatment*, 4(2), 87. <https://doi.org/10.14791/btrt.2016.4.2.87>
277. Kim, S. H., & Byun, Y. (2018). Trajectories of Symptom Clusters, Performance Status, and Quality of Life during Concurrent Chemoradiotherapy in Patients with High-Grade Brain Cancers. *Cancer Nursing*, 41(1), E38–E47. <https://doi.org/10.1097/NCC.0000000000000435>
278. Kim, S. (2018). A longitudinal study of lipid peroxidation and symptom clusters in patients with brain cancers. *Nursing Research*, 67(5), 387–394. <https://doi.org/10.1097/NNR.0000000000000302>
279. Kim, S. (2020). Sensory changes and lipoprotein ratios in patients with brain cancers during cancer-related therapy: A prospective cross-sectional study. *Japan Journal of Nursing Science*, 17, e12315. <https://doi.org/10.1111/jjns.12315>
280. Kim, S. R., Shin, Y. S., Kim, J. H., Choi, M., & Yoo, S. H. (2017). Differences in Type Composition of Symptom Clusters as Predictors of Quality of Life in Patients with Meningioma and Glioma. *World Neurosurgery*, 98, 50–59. <https://doi.org/10.1016/j.wneu.2016.10.085>
281. Kirkpatrick, J. P., Wang, Z., Sampson, J. H., McSherry, F., Herndon, J. E., Allen, K. J., ... Yin, F. F. (2015). Defining the optimal planning target volume in image-guided stereotactic radiosurgery of brain metastases: Results of a randomized trial. *International Journal of Radiation Oncology Biology Physics*, 91(1), 100–108. <https://doi.org/10.1016/j.ijrobp.2014.09.004>
282. Kirste, S., Treier, M., Wehrle, S. J., Becker, G., Abdel-Tawab, M., Gerbeth, K., ... Momm, F. (2011). Boswellia serrata acts on cerebral edema in patients irradiated for brain tumors: A prospective, randomized, placebo-controlled, double-blind pilot trial. *Cancer*, 117(16), 3788–3795. <https://doi.org/10.1002/cncr.25945>
283. Kitamura, C., Ng, D., Chung, A., Bezjak, A., Garraway, C., McLean, M., ... Wong, R. K. S. (2011). Development and evaluation of a combined story and fact-based educational booklet for patients with multiple brain metastases and their caregivers. *Palliative Medicine*, 25(6), 642–649. <https://doi.org/10.1177/0269216310395647>
284. Klein, M., Heimans, J. J., Aaronson, N. K., Van Der Ploeg, H. M., Grit, J., Muller, M., ... Taphoorn, M. J. B. (2002). Effect of radiotherapy and other treatment-related factors on mid-term to long-term cognitive sequelae in low-grade gliomas: A comparative study. *Lancet*, 360(9343), 1361–1368. [https://doi.org/10.1016/S0140-6736\(02\)11398-5](https://doi.org/10.1016/S0140-6736(02)11398-5)
285. Klein, M., Engelberts, N. H., van der Ploeg, H. M., A Kasteleijn-Nolst Trenité, D. G., Aaronson, N. K., B Taphoorn, M. J., ... Heimans, J. J. (2003). *Epilepsy in Low-Grade Gliomas: The Impact on Cognitive Function and Quality of Life*. *Ann Neurol* (Vol. 54).
286. Klein, M., Taphoorn, M. J. B., Heimans, J. J., Van Der Ploeg, H. M., Vandertop, W. P., Smit, E. F., ... Aaronson, N. K. (2001). *Neurobehavioral Status and Health-Related Quality of Life in Newly Diagnosed High-Grade Glioma Patients*. *J Clin Oncol* (Vol. 19).
287. Kocher, M., Frommolt, P., Borberg, S. K., Rühl, U., Steingraber, M., Niewald, M., ... Müller, R. P. (2008). Randomized study of postoperative radiotherapy and simultaneous temozolomide without adjuvant chemotherapy for glioblastoma. *Strahlentherapie Und Onkologie*, 184(11), 572–579. <https://doi.org/10.1007/s00066-008-1897-0>

288. Kohlmann, K., Janko, M., Ringel, F., & Renovanz, M. (2020). Self-efficacy for coping with cancer in glioma patients measured by the Cancer Behavior Inventory Brief Version. *Psychoncology*, 29(3), 582-585.
289. Komosinska, K., Kepka, L., Niwinska, A., Pietrzak, L., Wierzchowski, M., Tyc-Szczepaniak, D., ... Bujko, K. (2010). Prospective evaluation of the palliative effect of whole-brain radiotherapy in patients with brain metastases and poor performance status. *Acta Oncologica*, 49(3), 382-388. <https://doi.org/10.3109/02841860903352942>
290. Kondziolka, D., Niranjan, A., Flickinger, J. C., & Lunsford, L. D. (2005, April). Radiosurgery with or without whole-brain radiotherapy for brain metastases: The patients' perspective regarding complications. *American Journal of Clinical Oncology: Cancer Clinical Trials*. <https://doi.org/10.1097/01.coc.0000143016.15783.5b>
291. Kong, D. S., Lee, J. H., Kim, J. H., Kim, S. T., Kim, W. S., Suh, Y. L., ... Nam, D. H. (2010). Phase II trial of low-dose continuous (metronomic) treatment of temozolomide for recurrent glioblastoma. *Neuro-Oncology*, 12(3), 289-296. <https://doi.org/10.1093/neuonc/nop030>
292. Kong, D.-S., Nam, D.-H., Kang, S.-H., Lee, J. W., Chang, J.-H., Kim, J.-H., ... Kim, C.-H. (2017). *Oncotarget 7003 www.impactjournals.com/oncotarget Phase III randomized trial of autologous cytokine-induced killer cell immunotherapy for newly diagnosed glioblastoma in korea. Oncotarget* (Vol. 8).
293. Konglund, A., Rogne, S. G., Lund-Johansen, M., Scheie, D., Helseth, E., & Meling, T. R. (2013). Outcome following surgery for intracranial meningiomas in the aging. *Acta Neurologica Scandinavica*, 127(3), 161-169. <https://doi.org/10.1111/j.1600-0404.2012.01692.x>
294. Koo, K., Kerba, M., Zeng, L., Zhang, L., Chen, E., Chow, E., & Sahgal, A. (2013). Quality of life in patients with brain metastases receiving upfront as compared to salvage stereotactic radiosurgery using the EORTC QLQ-C15-PAL and the EORTC QLQ BN20 + 2: a pilot study. *Journal of Radiation Oncology*, 2(2), 217-224. <https://doi.org/10.1007/s13566-012-0052-9>
295. Koo, K., Zeng, L., Chen, E., Zhang, L., Culleton, S., Dennis, K., ... Chow, E. (2012). Do elderly patients with metastatic cancer have worse quality of life scores? *Supportive Care in Cancer*, 20(9), 2121-2127. <https://doi.org/10.1007/s00520-011-1322-6>
296. Koot, R. W., De Heer, K., Oort, F. J., Hulshof, M. C. C. M., Bosch, D. A., & De Haes, J. C. J. M. (2004). Quality of life after brachytherapy in patients with glioblastoma multiforme. *European Journal of Cancer*, 40(7), 1013-1020. <https://doi.org/10.1016/j.ejca.2004.01.018>
297. Kotecha, R., Damico, N., Miller, J. A., Suh, J. H., Murphy, E. S., Reddy, C. A., ... Chao, S. T. (2017). Three or more courses of stereotactic radiosurgery for patients with multiply recurrent brain metastases. *Clinical Neurosurgery*, 80(6), 871-879. <https://doi.org/10.1093/neuros/nyw147>
298. Kreisl, T. N., Smith, P., Sul, J., Salgado, C., Iwamoto, F. M., Shih, J. H., & Fine, H. A. (2013). Continuous daily sunitinib for recurrent glioblastoma. *Journal of Neuro-Oncology*, 111(1), 41-48. <https://doi.org/10.1007/s11060-012-0988-z>
299. Kubben, P. L., Scholtes, F., Schijns, O. E. M. G., Ter Laak-Poort, M. P., Teernstra, O. P. M., Kessels, A. G. H., ... Van Santbrink, H. (2014). Intraoperative magnetic resonance imaging versus standard neuronavigation for the neurosurgical treatment of glioblastoma: A randomized controlled trial. *Surgical Neurology International*, 5(Supplement). <https://doi.org/10.4103/2152-7806.132572>
300. Kumar, N., Kumar, R., Sharma, S. C., Mukherjee, A., Khandelwal, N., Tripathi, M., ... & Khosla, D. (2020). Impact of volume of irradiation on survival and quality of life in glioblastoma: a prospective, phase 2, randomized comparison of RTOG and MDACC protocols. *Neuro-Oncology Practice*, 7(1), 86-93. <https://doi.org/10.1093/nop/npz024>
301. Kvale, E. A., Murthy, R., Taylor, R., Lee, J. Y., & Nabors, L. B. (2009). Distress and quality of life in primary high-grade brain tumor patients. *Supportive Care in Cancer*, 17(7), 793-799. <https://doi.org/10.1007/s00520-008-0551-9>
302. Laack, N. N., Pugh, S. L., Brown, P. D., Fox, S., Wefel, J. S., Meyers, C., ... & Wendland, M. M. (2019). The association of health-related quality of life and cognitive function in patients



- receiving memantine for the prevention of cognitive dysfunction during whole-brain radiotherapy. *Neuro-Oncology Practice*, 6(4), 274-282.
303. Lai, J. S., Jensen, S. E., Beaumont, J. L., Abernethy, A. P., Jacobsen, P. B., Syrjala, K., ... Cella, D. (2014). Development of a symptom index for patients with primary brain tumors. *Value in Health*, 17(1), 62–69. <https://doi.org/10.1016/j.jval.2013.11.006>
  304. Lamperti, E., Pantaleo, G., Finocchiaro, C. Y., Silvani, A., Botturi, A., Gaviani, P., ... Salmaggi, A. (2012). Recurrent brain tumour: The impact of illness on patient's life. *Supportive Care in Cancer*, 20(6), 1327–1332. <https://doi.org/10.1007/s00520-011-1220-y>
  305. Lang, D. A., Neil-dwyer, G., & Garfield, J. (1999). *Outcome after complex neurosurgery: the caregiver's burden is forgotten*.
  306. Langegård, U., Ahlberg, K., Fransson, P., Johansson, B., Sjövall, K., Bjork-Eriksson, T., & Ohlsson-Nevo, E. (2019). Evaluation of quality of care in relation to health-related quality of life of patients diagnosed with brain tumor: a novel clinic for proton beam therapy. *Supportive Care in Cancer*, 27(7), 2679–2691. <https://doi.org/10.1007/s00520-018-4557-7>
  307. Langley, R. E., Stephens, R. J., Nankivell, M., Pugh, C., Moore, B., Navani, N., ... Mulvenna, P. M. (2013). Interim Data from the Medical Research Council QUARTZ Trial: Does Whole Brain Radiotherapy Affect the Survival and Quality of Life of Patients with Brain Metastases from Non-small Cell Lung Cancer? *Clinical Oncology*, 25(3). <https://doi.org/10.1016/j.clon.2012.11.002>
  308. Lee, E. Q., Muzikansky, A., Drappatz, J., Kesari, S., Wong, E. T., Fadul, C. E., ... Wen, P. Y. (2016). A randomized, placebo-controlled pilot trial of armodafinil for fatigue in patients with gliomas undergoing radiotherapy. *Neuro-Oncology*, 18(6), 849–854. <https://doi.org/10.1093/neuonc/nov007>
  309. Lee, S. M., Lewanski, C. R., Counsell, N., Ottensmeier, C., Bates, A., Patel, N., ... Faivre-Finn, C. (2014). Randomized trial of erlotinib plus whole-brain radiotherapy for NSCLC patients with multiple brain metastases. *Journal of the National Cancer Institute*, 106(7). <https://doi.org/10.1093/jnci/dju151>
  310. Le Rhun, E., Devos, P., Bourg, V., Darlix, A., Lorgis, V., Ahle, G., ... & Frenay, C. L. (2019). Complementary and alternative medicine use in glioma patients in France. *Journal of neuro-oncology*, 145(3), 487-499.
  311. Levin, V. A., Phuphanich, S., Yung, W. K. A., Forsyth, P. A., Del Maestro, R., Perry, J. R., ... Baillet, M. (2006). Randomized, double-blind, placebo-controlled trial of marimastat in glioblastoma multiforme patients following surgery and irradiation. *Journal of Neuro-Oncology*, 78(3), 295–302. <https://doi.org/10.1007/s11060-005-9098-5>
  312. Leyrer, C. M., Chan, M. D., Peiffer, A. M., Horne, E., Harmon, M., Carter, A. F., ... Lesser, G. J. (2014). Taste and smell disturbances after brain irradiation: A dose-volume histogram analysis of a prospective observational study. *Practical Radiation Oncology*, 4(2), 130–135. <https://doi.org/10.1016/j.prro.2013.06.003>
  313. Li, J., Bentzen, S. M., Li, J., Renschler, M., & Mehta, M. P. (2008). Relationship Between Neurocognitive Function and Quality of Life After Whole-Brain Radiotherapy in Patients With Brain Metastasis. *International Journal of Radiation Oncology Biology Physics*, 71(1), 64–70. <https://doi.org/10.1016/j.ijrobp.2007.09.059>
  314. Li, J., Sun, L., Wang, X., Sun, C., Heng, S., Hu, X., ... Liu, F. (2019). Are posttraumatic stress symptoms and avoidant coping inhibitory factors? The association between posttraumatic growth and quality of life among low-grade gliomas patients in China. *Frontiers in Psychology*, 10(FEB). <https://doi.org/10.3389/fpsyg.2019.00330>
  315. Li, J., Wang, X., Wang, C., & Sun, L. (2019). The moderating role of depression on the association between posttraumatic growth and health-related quality of life in low-grade glioma patients in China. *Psychology, Health and Medicine*, 24(6), 643–653. <https://doi.org/10.1080/13548506.2018.1557714>

316. Lin, L., Acquaye, A. A., Vera-Bolanos, E., Cahill, J. E., Gilbert, M. R., & Armstrong, T. S. (2012). Validation of the Mishel's uncertainty in illness scale-brain tumor form (MUIS-BT). *Journal of Neuro-Oncology*, *110*(2), 293–300. <https://doi.org/10.1007/s11060-012-0971-8>
317. Lin, L., Chiang, H. H., Acquaye, A. A., Vera-Bolanos, E., Gilbert, M. R., & Armstrong, T. S. (2013). Uncertainty, mood states, and symptom distress in patients with primary brain tumors: Analysis of a conceptual model using structural equation modeling. *Cancer*, *119*(15), 2796–2806. <https://doi.org/10.1002/cncr.28121>
318. Lin, N. U., Freedman, R. A., Ramakrishna, N., Younger, J., Storniolo, A. M., Bellon, J. R., ... Winer, E. P. (2013). A phase I study of lapatinib with whole brain radiotherapy in patients with Human Epidermal Growth Factor Receptor 2 (HER2)-positive breast cancer brain metastases. *Breast Cancer Research and Treatment*, *142*(2), 405–414. <https://doi.org/10.1007/s10549-013-2754-0>
319. Litofsky, N. S., Farace, E., Anderson, F., Meyers, C. A., Huang, W., Laws, E. R., ... Westphal, M. (2004). Depression in Patients with High-grade Glioma: Results of the Glioma Outcomes Project. *Neurosurgery*, *54*(2), 358–367. <https://doi.org/10.1227/01.NEU.0000103450.94724.A2>
320. Liu, B., Liu, S., Wang, Y., Lu, D., Chen, L., Zheng, T., ... & He, S. (2020). Impact of neurosurgical enhanced recovery after surgery (ERAS) program on health-related quality of life in glioma patients: a secondary analysis of a randomized controlled trial. *Journal of Neuro-oncology*, *148*, 555–567. <https://doi.org/10.1007/s11060-020-03548-y>
321. Liu, R., Solheim, K., Polley, M.-Y., Lamborn, K. R., Page, M., Fedoroff, A., ... Chang, S. M. (2009). Quality of life in low-grade glioma patients receiving temozolomide. *Neuro-Oncology*, *11*(1), 59–68. <https://doi.org/10.1215/15228517-2008-063>
322. Liu, Y., Feng, F., Ji, P., Liu, B., Ge, S., Yang, C., ... Wang, L. (2018). Improvement of health related quality of life in patients with recurrent glioma treated with bevacizumab plus daily temozolomide as the salvage therapy. *Clinical Neurology and Neurosurgery*, *169*, 64–70. <https://doi.org/10.1016/j.clineuro.2018.03.026>
323. Locke, D. E., Cerhan, J. H., Wu, W., Malec, J. F., Clark, M. M., Rummans, T. A., & Brown, P. D. (2008). Cognitive rehabilitation and problem-solving to improve quality of life of patients with primary brain tumors: a pilot study. *The Journal of Supportive Oncology*, *6*(8), 383–391.
324. Locke, D. E. C., Decker, P. A., Sloan, J. A., Brown, P. D., Malec, J. F., Clark, M. M., ... Buckner, J. C. (2007). Validation of Single-Item Linear Analog Scale Assessment of Quality of Life in Neuro-Oncology Patients. *Journal of Pain and Symptom Management*, *34*(6), 628–638. <https://doi.org/10.1016/j.jpainsymman.2007.01.016>
325. Lombardi, G., Bergo, E., Bianco, P. D., Bellu, L., Pambuku, A., Caccese, M., ... Zagonel, V. (2018). Quality of Life Perception, Cognitive Function, and Psychological Status in a Real-world Population of Glioblastoma Patients Treated with Radiotherapy and Temozolomide A Single-center Prospective Study. *American Journal of Clinical Oncology: Cancer Clinical Trials*, *41*(12), 1263–1271. <https://doi.org/10.1097/COC.0000000000000459>
326. Loughan, A. R., Braun, S. E., & Lanoye, A. (2019). Executive dysfunction in neuro-oncology: Behavior Rating Inventory of Executive Function in adult primary brain tumor patients. *Applied Neuropsychology: Adult*. <https://doi.org/10.1080/23279095.2018.1553175>
327. Loughan, A. R., Lanoye, A., Aslanzadeh, F. J., Villanueva, A. A. L., Boutte, R., Husain, M., & Braun, S. (2019). Fear of Cancer Recurrence and Death Anxiety: Unaddressed concerns for adult neuro-oncology patients. *Journal of Clinical Psychology in Medical Settings*. <https://doi.org/10.1007/s10880-019-09690-8>
328. Lovely, M. P., Miaskowski, C., & Dodd, M. (1999). Relationship between fatigue and quality of life in patients with glioblastoma multiformae. *Oncology Nursing Forum*, *26*(5), 921–925.
329. Lowe, S. S., Danielson, B., Beaumont, C., Watanabe, S. M., Baracos, V. E., & Courneya, K. S. (2014). Associations between objectively measured physical activity and quality of life in cancer patients with brain metastases. *Journal of Pain and Symptom Management*, *48*(3), 322–332. <https://doi.org/10.1016/j.jpainsymman.2013.10.012>

330. Lowe, S. S., Danielson, B., Beaumont, C., Watanabe, S. M., & Courneya, K. S. (2016). Physical activity interests and preferences of cancer patients with brain metastases: A cross-sectional survey. *BMC Palliative Care*, *15*(1). <https://doi.org/10.1186/s12904-016-0083-x>
331. Lucchiari, C., Botturi, A., & Pravettoni, G. (2010). The impact of decision models on self-perceived quality of life: A study on brain cancer patients. *Ecancermedicalscience*, *4*(1). <https://doi.org/10.3332/ecancer.2010.187>
332. Lucchiari, C., Botturi, A., Silvani, A., Lamperti, E., Gaviani, P., Innocenti, A., ... Pravettoni, G. (2015). Cognitive strategies and quality of life of patients with high-grade glioma. *Supportive Care in Cancer*, *23*(12), 3427–3435. <https://doi.org/10.1007/s00520-015-2691-z>
333. Lucchiari, C., Botturi, A., Manzini, L., Masiero, M., & Pravettoni, G. (2015). Experiencing brain cancer: What physicians should know about patients. *Ecancermedicalscience*, *9*. <https://doi.org/10.3332/ecancer.2015.591>
334. Lv, Y., Zhang, J., Liu, Z., Liang, N., & Tian, Y. (2018). Quality of life and efficacy of temozolomide combined with whole-brain radiotherapy in patients with brain metastases from non-small-cell lung cancer. *Molecular and Clinical Oncology*. <https://doi.org/10.3892/mco.2018.1622>
335. Lyons, G. J. (1996). The 'PRESTON Profile'- The first disease-specific tool for assessing quality of life in patients with malignant glioma. *Disability and Rehabilitation*, *18*(9), 460–468. <https://doi.org/10.3109/09638289609165910>
336. Ma, S., Xu, Y., Deng, Q., & Yu, X. (2009). Treatment of brain metastasis from non-small cell lung cancer with whole brain radiotherapy and Gefitinib in a Chinese population. *Lung Cancer*, *65*(2), 198–203. <https://doi.org/10.1016/j.lungcan.2008.10.028>
337. Mackworth, N., Fobair, P., & Prados, M. D. (1992). *Quality of life self-reports from 200 brain tumor patients: comparisons with Karnofsky performance scores*. *Journal of Neuro-Oncology* (Vol. 14).
338. Mahalakshmi, P., & Vanisree, A. J. (2015). Quality of life measures in glioma patients with different grades: A preliminary study. In *Indian Journal of Cancer* (Vol. 52, pp. 580–585). Medknow Publications. <https://doi.org/10.4103/0019-509X.178395>
339. Maialetti, A., Maschio, M., Zarabla, A., Polimadei, C., Papa, E., Villani, V., & Giannarelli, D. (2020). Multimodal pathway for brain tumor-related epilepsy patients: Observational study. *Acta Neurologica Scandinavica*, *141*(6), 450–462.
340. Mainio, A., Hakko, H., Niemelä, A., Koivukangas, J., & Räsänen, P. (2013). Insomnia among brain tumor patients: A population-based prospective study of tumor patients in Northern Finland. *Journal of Psychosocial Oncology*, *31*(5), 507–516. <https://doi.org/10.1080/07347332.2013.822048>
341. Malmström, A., Grønberg, B. H., Marosi, C., Stupp, R., Frappaz, D., Schultz, H., ... Henriksson, R. (2012). Temozolomide versus standard 6-week radiotherapy versus hypofractionated radiotherapy in patients older than 60 years with glioblastoma: The Nordic randomised, phase 3 trial. *The Lancet Oncology*, *13*(9), 916–926. [https://doi.org/10.1016/S1470-2045\(12\)70265-6](https://doi.org/10.1016/S1470-2045(12)70265-6)
342. Maringwa, J., Quinten, C., King, M., Ringash, J., Osoba, D., Coens, C., ... Bottomley, A. (2011). Minimal clinically meaningful differences for the EORTC QLQ-C30 and EORTC QLQ-BN20 scales in brain cancer patients. *Annals of Oncology*, *22*(9), 2107–2112. <https://doi.org/10.1093/annonc/mdq726>
343. Marotta, D., Tucker, Z., Hayward, E. N., Gerstenecker, A., Gammon, M., Mason, M., ... & Triebel, K. (2020). Relationship between cognitive functioning, mood, and other patient factors on quality of life in metastatic brain cancer. *Psycho-Oncology*, *29*(7), 1174–1184. <https://doi.org/10.1002/pon.5401>
344. Marx, G. M., Pavlakis, N., Mccowatt, S., Boyle, F. M., Levi, J. A., Bell, D. R., ... Wheeler, H. R. (2001). *Phase II study of Thalidomide in the treatment of recurrent glioblastoma multiforme*. *Journal of Neuro-Oncology* (Vol. 54).
345. Maschio, M., Dinapoli, L., Sperati, F., Fabi, A., Pace, A., Vidiri, A., & Muti, P. (2012). Oxcarbazepine monotherapy in patients with brain tumor-related epilepsy: Open-label pilot study for assessing



- the efficacy, tolerability and impact on quality of life. *Journal of Neuro-Oncology*, 106(3), 651–656. <https://doi.org/10.1007/s11060-011-0689-z>
346. Maschio, M., Dinapoli, L., Sperati, F., Pace, A., Fabi, A., Vidiri, A., & Muti, P. (2011). Levetiracetam monotherapy in patients with brain tumor-related epilepsy: Seizure control, safety, and quality of life. *Journal of Neuro-Oncology*, 104(1), 205–214. <https://doi.org/10.1007/s11060-010-0460-x>
347. Maschio, M., Dinapoli, L., Sperati, F., Pace, A., Fabi, A., Vidiri, A., ... Carapella, C. M. (2012). Effect of pregabalin add-on treatment on seizure control, quality of life, and anxiety in patients with brain tumour-related epilepsy: A pilot study. *Epileptic Disorders*, 14(4), 388–397. <https://doi.org/10.1684/epd.2012.0542>
348. Maschio, M., Dinapoli, L., Zarabla, A., Maialetti, A., Giannarelli, D., Fabi, A., ... Cantelmi, T. (2017). Zonisamide in brain tumor-related epilepsy: An observational pilot study. *Clinical Neuropharmacology*, 40(3), 113–119. <https://doi.org/10.1097/WNF.0000000000000218>
349. Maschio, M., Sperati, F., Dinapoli, L., Vidiri, A., Fabi, A., Pace, A., ... Cantelmi, T. (2014). Weight of epilepsy in brain tumor patients. *Journal of Neuro-Oncology*, 118(2), 385–393. <https://doi.org/10.1007/s11060-014-1449-7>
350. Maschio, M., Zarabla, A., Maialetti, A., Fabi, A., Vidiri, A., Villani, V., & Giannarelli, D. (2017). Quality of life, mood and seizure control in patients with brain tumor related epilepsy treated with lacosamide as add-on therapy: A prospective explorative study with a historical control group. *Epilepsy and Behavior*, 73, 83–89. <https://doi.org/10.1016/j.yebeh.2017.05.031>
351. Maschio, M., Zarabla, A., Maialetti, A., Giannarelli, D., Koudriavtseva, T., Villani, V., & Zannino, S. (2020). Perampanel in brain tumor-related epilepsy: Observational pilot study. *Brain and Behavior*, 10(6) e01612. <https://doi.org/10.1002/brb3.1612>
352. Mauer, M., Stupp, R., Taphoorn, M. J. B., Coens, C., Osoba, D., Marosi, C., ... Bottomley, A. (2007). The prognostic value of health-related quality-of-life data in predicting survival in glioblastoma cancer patients: Results from an international randomised phase III EORTC Brain Tumour and Radiation Oncology Groups, and NCIC Clinical Trials Group study. *British Journal of Cancer*, 97(3), 302–307. <https://doi.org/10.1038/sj.bjc.6603876>
353. Mauer, M. E. L., Taphoorn, M. J. B., Bottomley, A., Coens, C., Efficace, F., Sanson, M., ... van den Bent, M. J. (2007). Prognostic value of health-related quality-of-life data in predicting survival in patients with anaplastic oligodendrogliomas, from a phase III EORTC brain cancer group study. *Journal of Clinical Oncology*, 25(36), 5731–5737. <https://doi.org/10.1200/JCO.2007.11.1476>
354. McCarter, H., Furlong, W., Whitton, A. C., Feeny, D., DePauw, S., Willan, A. R., & Barr, R. D. (2006). Health status measurements at diagnosis as predictors of survival among adults with brain tumors. *Journal of Clinical Oncology*, 24(22), 3636–3643. <https://doi.org/10.1200/JCO.2006.06.0137>
355. McCarty, S., Eickmeyer, S. M., Kocherginsky, M., Keeshin, S., Shahpar, S., Semik, P., & Wong, A. W. K. (2017). Health-Related Quality of Life and Cancer-Related Symptoms during Interdisciplinary Outpatient Rehabilitation for Malignant Brain Tumor. *American Journal of Physical Medicine and Rehabilitation*, 96(12), 852–860. <https://doi.org/10.1097/PHM.0000000000000756>
356. Meyers, C. A., & Hess, K. R. (2003). Multifaceted end points in brain tumor clinical trials: cognitive deterioration precedes MRI progression. *Neuro-Oncology*, 5(2), 89–95.
357. Meyers, C. A., Hess, K. R., Yung, W. A., & Levin, V. A. (2000). Cognitive function as a predictor of survival in patients with recurrent malignant glioma. *Journal of Clinical Oncology*, 18(3), 646–646.
358. Meyers, C. A., Weitzner, M. A., Valentine, A. D., & Levin, V. A. (1998). Methylphenidate therapy improves cognition, mood, and function of brain tumor patients. *Journal of Clinical Oncology*, 16(7), 2522–2527.
359. Miao, Y., Lu, X., Qiu, Y., Jiang, J., & Lin, Y. (2010). A multivariate analysis of prognostic factors for health-related quality of life in patients with surgically managed meningioma. *Journal of Clinical Neuroscience*, 17(4), 446–449. <https://doi.org/10.1016/j.jocn.2009.07.111>

360. Milbury, K., Weathers, S. P., Durrani, S., Li, Y., Whisenant, M., Li, J., ... & Bruera, E. (2020). Online Couple-Based Meditation Intervention for Patients With Primary or Metastatic Brain Tumors and Their Partners: Results of a Pilot Randomized Controlled Trial. *Journal of pain and symptom management*, *59*(6), 1260-1267.
361. Milbury, K., Li, J., Weathers, S. P., Mallaiah, S., Armstrong, T., Li, Y., ... & Cohen, L. (2019). Pilot randomized, controlled trial of a dyadic yoga program for glioma patients undergoing radiotherapy and their family caregivers. *Neuro-Oncology Practice*, *6*(4), 311-320.
362. Millar, B.-A. M., Purdie, T. G., Yeung, I., Pond, G. R., Billingsley, S., Wong, R., ... Laperriere, N. (n.d.). *Assessing perfusion changes during whole brain irradiation for patients with cerebral metastases*.
363. Miller, J. A., Kotecha, R., Barnett, G. H., Suh, J. H., Angelov, L., Murphy, E. S., ... Chao, S. T. (2017). Quality of Life following Stereotactic Radiosurgery for Single and Multiple Brain Metastases. *Neurosurgery*, *81*(1), 147–155. <https://doi.org/10.1093/neuros/nyw166>
364. Minniti, G., De Sanctis, V., Muni, R., Rasio, D., Lanzetta, G., Bozzao, A., ... Maurizi Enrici, R. (2009). Hypofractionated radiotherapy followed by adjuvant chemotherapy with temozolomide in elderly patients with glioblastoma. *Journal of Neuro-Oncology*, *91*(1), 95–100. <https://doi.org/10.1007/s11060-008-9689-z>
365. Minniti, G., Scaringi, C., Baldoni, A., Lanzetta, G., De Sanctis, V., Esposito, V., & Enrici, R. M. (2013). Health-related quality of life in elderly patients with newly diagnosed glioblastoma treated with short-course radiation therapy plus concomitant and adjuvant temozolomide. *International Journal of Radiation Oncology Biology Physics*, *86*(2), 285–291. <https://doi.org/10.1016/j.ijrobp.2013.02.013>
366. Mobed, K., Liu, R., Stewart, S., Wrensch, M., McCoy, L., Rice, T., ... Chang, S. (n.d.). *Quality of Life and Patterns of Use of Complementary and Alternative Medicines Among Glioma Patients*.
367. Mohsenipour, I., Deusch, E., Gabl, M., Hofer, M., & Twerdy, K. (2001). Quality of Life in Patients after Meningioma Resection. *Acta Neurochirurgica*, *143*, 547-553.
368. Moinpour, C. M., Lyons, B., Schmidt, S. P., Chansky, K., & Patchell, R. A. (n.d.). *Substituting proxy ratings for patient ratings in cancer clinical trials: An analysis based on a Southwest Oncology Group trial in patients with brain metastases*.
369. Mu, Y. G., Huang, L. J., Li, S. Y., Ke, C., Chen, Y., Jin, Y., & Chen, Z. P. (2012). Working memory and the identification of facial expression in patients with left frontal glioma. *Neuro-Oncology*, *14*(SUPPL.4). <https://doi.org/10.1093/neuonc/nos215>
370. Muacevic, A., Wowra, B., Siefert, A., Tonn, J. C., Steiger, H. J., & Kreth, F. W. (2008). Microsurgery plus whole brain irradiation versus Gamma Knife surgery alone for treatment of single metastases to the brain: a randomized controlled multicentre phase III trial. *Journal of Neuro-Oncology*, *87*(3), 299–307. <https://doi.org/10.1007/s11060-007-9510-4>
371. Mukherjee, S., Wood, J., Liaquat, I., Stapleton, S. R., & Martin, A. J. (2020). Craniotomy for recurrent glioblastoma: Is it justified? A comparative cohort study with outcomes over 10 years. *Clinical neurology and neurosurgery*, *188*, 105568. <https://doi.org/10.1016/j.clineuro.2019.105568>
372. Mulvenna, P., Nankivell, M., Barton, R., Faivre-Finn, C., Wilson, P., McColl, E., ... Langley, R. E. (2016). Dexamethasone and supportive care with or without whole brain radiotherapy in treating patients with non-small cell lung cancer with brain metastases unsuitable for resection or stereotactic radiotherapy (QUARTZ): results from a phase 3, non-inferiority, randomised trial. *The Lancet*, *388*(10055), 2004–2014. [https://doi.org/10.1016/S0140-6736\(16\)30825-X](https://doi.org/10.1016/S0140-6736(16)30825-X)
373. Munoz, C., Juarez, G., Munoz, M. L., Portnow, J., Fineman, I., Badie, B., ... Ferrell, B. (2008). The quality of life of patients with malignant gliomas and their caregivers. *Social Work in Health Care*, *47*(4), 455–478. <https://doi.org/10.1080/00981380802232396>
374. Nakano, T., Aoyama, H., Saito, H., Tanabe, S., Tanaka, K., Maruyama, K., ... & Kaidu, M. (2020). The neurocognitive function change criteria after whole-brain radiation therapy for brain

- metastasis, in reference to health-related quality of life changes: a prospective observation study. *BMC cancer*, 20(66). <https://doi.org/10.1186/s12885-020-6559-3>
375. Nassiri, F., Price, B., Shehab, A., Au, K., Cusimano, M. D., Jenkinson, M. D., ... Workewych, A. M. (2019). Life after surgical resection of a meningioma: A prospective cross-sectional study evaluating health-related quality of life. *Neuro-Oncology*, 21, 132–143. <https://doi.org/10.1093/neuonc/noy152>
376. Naughton, M. J., Douglas Case, L., Peiffer, A., Chan, M., Stieber, V., Moore, D., ... Rapp, S. R. (2018). Quality of life of irradiated brain tumor survivors treated with donepezil or placebo: Results of the WFU CCOP research base protocol 91105. *Neuro-Oncology Practice*, 5(2), 114–121. <https://doi.org/10.1093/nop/npx016>
377. Neil-Dwyer, G., Lang, D., Garfield, J., Coll, A. R., & Engl, S. (2001). *The realities of postoperative disability and the carer's burden The Royal College of Surgeons of Etigiand. Ann R Coll Surg Engl* (Vol. 83).
378. Neil-Dwyer<sup>1</sup>, G., Lang<sup>1</sup>, D. A., & Davis<sup>2</sup>, A. (n.d.). *Outcome from Complex Neurosurgery: An Evidence Based Approach*.
379. Neuhaus, T., Ko, Y., Muller, R. P., Grabenbauer, G. G., Hedde, J. P., Schueller, H., ... Fietkau, R. (2009). A phase III trial of topotecan and whole brain radiation therapy for patients with CNS-metastases due to lung cancer. *British Journal of Cancer*, 100(2), 291–297. <https://doi.org/10.1038/sj.bjc.6604835>
380. Nguyen, J., Caissie, A., Zhang, L., Zeng, L., Dennis, K., Holden, L., ... Chow, E. (2013). Dexamethasone toxicity and quality of life in patients with brain metastases following palliative whole-brain radiotherapy. *Journal of Radiation Oncology*, 2(4), 435–443. <https://doi.org/10.1007/s13566-012-0019-x>
381. Nguyen, J., Zhang, L., Clemons, M., Vassiliou, V., Danielson, B., Fairchild, A., ... Chow, E. (2012). Content validation of the EORTC QLQ-BN20+2 with patients and health care professionals to assess quality of life in brain metastases. *Journal of Radiation Oncology*, 1(4), 397–409. <https://doi.org/10.1007/s13566-012-0044-9>
382. Nickel, K., Renovanz, M., König, J., Stöckelmaier, L., Hickmann, A. K., Nadji-Ohl, M., ... Coburger, J. (2018). The patients' view: impact of the extent of resection, intraoperative imaging, and awake surgery on health-related quality of life in high-grade glioma patients—results of a multicenter cross-sectional study. *Neurosurgical Review*, 41(1), 207–219. <https://doi.org/10.1007/s10143-017-0836-x>
383. Nicole Culos-Reed, S., Leach, H. J., Capozzi, L. C., Easaw, J., Eves, N., & Millet, G. Y. (2017). Exercise preferences and associations between fitness parameters, physical activity, and quality of life in high-grade glioma patients. *Supportive Care in Cancer*, 25(4), 1237–1246. <https://doi.org/10.1007/s00520-016-3516-4>
384. Noll, K. R., Bradshaw, M. E., Weinberg, J. S., & Wefel, J. S. (2017). Relationships between neurocognitive functioning, mood, and quality of life in patients with temporal lobe glioma. *Psycho-Oncology*, 26(5), 617–624. <https://doi.org/10.1002/pon.4046>
385. Noll, K. R., Sullaway, C. M., & Wefel, J. S. (2019). Depressive symptoms and executive function in relation to survival in patients with glioblastoma. *Journal of Neuro-Oncology*, 142(1), 183–191. <https://doi.org/10.1007/s11060-018-03081-z>
386. Novello, S., Camps, C., Grossi, F., Mazieres, J., Abrey, L., Vernejoux, J.-M., ... Scagliotti, G. (2011). *Phase II Study of Sunitinib in Patients with Non-small Cell Lung Cancer and Irradiated Brain Metastases*.
387. O'Kane, G. M., Su, J., Tse, B. C., Tam, V., Tse, T., Lu, L., ... Liu, G. (2019). The Impact of Brain Metastases and Associated Neurocognitive Aspects on Health Utility Scores in EGFR Mutated and ALK Rearranged NSCLC: A Real World Evidence Analysis. *The Oncologist*, 24(7). <https://doi.org/10.1634/theoncologist.2018-0544>
388. Oberg, J. A., Dave, A. N., Bruce, J. N., & Sands, S. A. (2014). Neurocognitive functioning and quality of life in patients with recurrent malignant gliomas treated on a phase Ib trial evaluating

- topotecan by convection-enhanced delivery. *Neuro-Oncology Practice*, 1(3), 94–100. <https://doi.org/10.1093/nop/npu014>
389. Oda, Y., Iwamoto, F. M., Moustakas, A., Fraum, T. J., Salgado, C. A., Li, A., ... Fine, H. A. (2016). A phase II trial of enzastaurin (LY317615) in combination with bevacizumab in adults with recurrent malignant gliomas. *Journal of Neuro-Oncology*, 127(1), 127–135. <https://doi.org/10.1007/s11060-015-2020-x>
390. Okita, Y., Narita, Y., Miyahara, R., Miyakita, Y., Ohno, M., & Shibui, S. (2015). Health-related quality of life in long-term survivors with Grade II gliomas: The contribution of disease recurrence and Karnofsky Performance Status. *Japanese Journal of Clinical Oncology*, 45(10), 906–913. <https://doi.org/10.1093/jjco/hyv115>
391. Okita, Y., Narita, Y., Miyakita, Y., Miyahara, R., Ohno, M., Takahashi, M., ... Fujinaka, T. (2016). Health-related quality of life in outpatients with primary central nervous system lymphoma after radiotherapy and high-dose methotrexate chemotherapy. *Molecular and Clinical Oncology*, 5(3), 179–185. <https://doi.org/10.3892/mco.2016.962>
392. Omuro, A., Beal, K., Gutin, P., Karimi, S., Correa, D. D., Kaley, T. J., ... Huse, J. T. (2014). Phase II study of bevacizumab, temozolomide, and hypofractionated stereotactic radiotherapy for newly diagnosed glioblastoma. *Clinical Cancer Research*, 20(19), 5023–5031. <https://doi.org/10.1158/1078-0432.CCR-14-0822>
393. Omuro, A., Chinot, O., Taillandier, L., Ghesquieres, H., Soussain, C., Delwail, V., ... & Huchet, A. (2015). Methotrexate and temozolomide versus methotrexate, procarbazine, vincristine, and cytarabine for primary CNS lymphoma in an elderly population: an intergroup ANOCEF-GOELAMS randomised phase 2 trial. *The Lancet Haematology*, 2(6), e251–e259.
394. Onken, J. S., Goerling, U., Heinrich, M., Pleissner, S., Krex, D., Vajkoczy, P., & Misch, M. (2019). Patient Reported Outcome (PRO) Among High-Grade Glioma Patients Receiving TTFIELDS Treatment: A Two Center Observational Study. *Frontiers in neurology*, 10, 1026. <https://doi.org/10.3389/fneur.2019.01026>
395. Oort, Q., Dirven, L., Meijer, W., Sikkes, S. A. M., Uitdehaag, B. M. J., Reijneveld, J. C., & Taphoorn, M. J. B. (2017). Development of a questionnaire measuring instrumental activities of daily living (IADL) in patients with brain tumors: a pilot study. *Journal of Neuro-Oncology*, 132(1), 145–153. <https://doi.org/10.1007/s11060-016-2352-1>
396. Osman. (2014). Temozolomide and Reirradiation in Recurrent Grade II Brain Glioma. *World Journal of Oncology*. <https://doi.org/10.14740/wjon838w>
397. Osman, M. A. M. (2014). Phase II trial of temozolomide and reirradiation using conformal 3D-radiotherapy in recurrent brain gliomas. *Annals of Translational Medicine*, 2(5). <https://doi.org/10.3978/j.issn.2305-5839.2014.05.06>
398. Osoba, D., Aaronson, N. K., Muller, M., Sneeuw, K., Hsu, M. A., Yung, W. A., ... & Newlands, E. (1996). The development and psychometric validation of a brain cancer quality-of-life questionnaire for use in combination with general cancer-specific questionnaires. *Quality of Life Research*, 5(1), 139-150.
399. Osoba, D., Aaronson, N. K., Muller, M., Sneeuw, K., Hsu, M. A., Yung, W. A., ... & Newlands, E. (1997). Effect of neurological dysfunction on health-related quality of life in patients with high-grade glioma. *Journal of neuro-oncology*, 34(3), 263-278.
400. Osoba, D., Brada, M., Prados, M. D., & Yung, W. K. A. (2000). Effect of disease burden on health-related quality of life in patients with malignant gliomas. *Neuro-Oncology*, 2(4), 221-228.
401. Osoba, D., Brada, M., Yung, W. A., & Prados, M. (2000). Health-related quality of life in patients treated with temozolomide versus procarbazine for recurrent glioblastoma multiforme. *Journal of Clinical Oncology*, 18(7), 1481-1491.
402. Osoba, D., Brada, M., Yung, W. A., & Prados, M. D. (2000). Health-related quality of life in patients with anaplastic astrocytoma during treatment with temozolomide. *European Journal of Cancer*, 36(14), 1788-1795.

403. Ownsworth, T., Chambers, S., Damborg, E., Casey, L., Walker, D. G., & Shum, D. H. K. (2015). Evaluation of the making sense of brain tumor program: A randomized controlled trial of a home-based psychosocial intervention. *Psycho-Oncology*, 24(5), 540–547. <https://doi.org/10.1002/pon.3687>
404. Ownsworth, T., Dwan, T., Chambers, S., Walker, D. G., & Shum, D. H. K. (2014). The moderating effect of estimated pre-morbid IQ on the relationship between neuropsychological status and subjective well-being after brain tumour. *Journal of Psychosomatic Research*, 76(3), 257–260. <https://doi.org/10.1016/j.jpsychores.2013.12.008>
405. Ownsworth, T., Hawkes, A. L., Chambers, S., Walker, D. G., & Shum, D. (2010). Applying a biopsychosocial perspective to investigate factors related to emotional adjustment and quality of life for individuals with brain tumour. *Brain Impairment*, 11(3), 270–280. <https://doi.org/10.1375/brim.11.3.270>
406. Pace, A., Parisi, C., Di Lelio, M., Zizzari, A., Petreri, G., Giovannelli, M., & Pompili, A. (2007). Home Rehabilitation for Brain Tumor Patients. *Journal of Experimental & Clinical Cancer Research*, 26(3), 297–300.
407. Pace, A., Vidiri, A., Galiè, E., Carosi, M., Telera, S., Cianciulli, A. M., ... Carapella, C. M. (2003). Temozolomide chemotherapy for progressive low-grade glioma: Clinical benefits and radiological response. *Annals of Oncology*, 14(12), 1722–1726. <https://doi.org/10.1093/annonc/mdg502>
408. Page, B. R., Shaw, E. G., Lu, L., Bryant, D., Grisell, D., Lesser, G. J., ... Chan, M. D. (2015). Phase II double-blind placebo-controlled randomized study of armodafinil for brain radiation-induced fatigue. *Neuro-Oncology*, 17(10), 1393–1401. <https://doi.org/10.1093/neuonc/nov084>
409. Pålsson, A., Ek, L., Ahlström, G., & Smits, A. (2003). *Pitfalls in the assessment of disability in individuals with low-grade gliomas*. *Journal of Neuro-Oncology* (Vol. 65).
410. Palese, A., Cecconi, M., Moreale, R., & Skrap, M. (2012). Pre-operative stress, anxiety, depression and coping strategies adopted by patients experiencing their first or recurrent brain neoplasm: An explorative study. *Stress and Health*, 28(5), 416–425. <https://doi.org/10.1002/smi.2472>
411. Pan, H. C., Sun, M. H., Chen, C. C. C., Chen, C. J., Lee, C. H., & Sheehan, J. (2008). Neuroimaging and quality-of-life outcomes in patients with brain metastasis and peritumoral edema who undergo Gamma Knife surgery. *Journal of Neurosurgery*, 109 Suppl, 90–98. <https://doi.org/10.3171/jns/2008/109/12/s15>
412. Panhans, C. M., Gresham, G., Amaral, J. L., & Hu, J. (2020). Exploring the feasibility and effects of a ketogenic diet in patients with CNS malignancies: A retrospective case series. *Frontiers in Neuroscience*, 14, 390. doi: 10.3389/fnins.2020.00390
413. Paquette, B., Vernerey, D., Chauffert, B., Dabakuyo, S., Feuvret, L., Taillandier, L., ... Bonnetain, F. (2016). Prognostic value of health-related quality of life for death risk stratification in patients with unresectable glioblastoma. *Cancer Medicine*, 5(8), 1753–1764. <https://doi.org/10.1002/cam4.734>
414. Patil, V. M., Malhotra, M., Tonse, R., Deodhar, J., Chandrasekharan, A., Pande, N., ... & Jalali, R. (2019). A cross-sectional audit of distress in patients undergoing adjuvant therapy or follow-up in central nervous system malignancies. *Neuro-Oncology Practice*, 6(4), 305–310.
415. Patel, M. P., Woodring, S., Randazzo, D. M., Friedman, H. S., Desjardins, A., Healy, P., ... & Peters, K. B. (2020). Randomized open-label phase II trial of 5-day aprepitant plus ondansetron compared to ondansetron alone in the prevention of chemotherapy-induced nausea-vomiting (CINV) in glioma patients receiving adjuvant temozolomide. *Supportive Care in Cancer*, 28(5), 2229–2238.
416. Peeters, M. C., Dirven, L., Koekkoek, J. A., Gortmaker, E. G., Fritz, L., Vos, M. J., & Taphoorn, M. J. (2020). Prediagnostic symptoms and signs of adult glioma: the patients' view. *Journal of Neuro-Oncology*, 146(2), 293–301.



417. Pelletier, G., Verhoef, M. J., Khatri, N., & Hagen, N. (2002). *Quality of life in brain tumor patients: the relative contributions of depression, fatigue, emotional distress, and existential issues. Journal of Neuro-Oncology* (Vol. 57).
418. Pérez-Larraya, J. G., Ducray, F., Chinot, O., Catry-Thomas, I., Taillandier, L., Guillamo, J. S., ... Delattre, J. Y. (2011). Temozolomide in elderly patients with newly diagnosed glioblastoma and poor performance status: An ANOCEF phase II trial. *Journal of Clinical Oncology*, 29(22), 3050–3055. <https://doi.org/10.1200/JCO.2011.34.8086>
419. Perry, J. R., Laperriere, N., O’Callaghan, C. J., Brandes, A. A., Menten, J., Phillips, C., ... Mason, W. P. (2017). Short-course radiation plus temozolomide in elderly patients with glioblastoma. *New England Journal of Medicine*, 376(11), 1027–1037. <https://doi.org/10.1056/NEJMoa1611977>
420. Pesce, G. A., Klingbiel, D., Ribbi, K., Zouhair, A., Von Moos, R., Schlaeppli, M., ... Stupp, R. (2012). Outcome, quality of life and cognitive function of patients with brain metastases from non-small cell lung cancer treated with whole brain radiotherapy combined with gefitinib or temozolomide. A randomised phase II trial of the Swiss Group for Clinical Cancer Research (SAKK 70/03). *European Journal of Cancer*, 48(3), 377–384. <https://doi.org/10.1016/j.ejca.2011.10.016>
421. Peters, K. B., West, M. J., Hornsby, W. E., Waner, E., Coan, A. D., McSherry, F., ... Jones, L. W. (2014). Impact of health-related quality of life and fatigue on survival of recurrent high-grade glioma patients. *Journal of Neuro-Oncology*, 120(3), 499–506. <https://doi.org/10.1007/s11060-014-1574-3>
422. Petruzzi, A., Finocchiaro, C. Y., Lamperti, E., & Salmaggi, A. (2013). Living with a brain tumor: Reaction profiles in patients and their caregivers. *Supportive Care in Cancer*, 21(4), 1105–1111. <https://doi.org/10.1007/s00520-012-1632-3>
423. Pham, A., Yondorf, M. Z., Parashar, B., Scheff, R. J., Pannullo, S. C., Ramakrishna, R., ... Wernicke, A. G. (2016). Neurocognitive function and quality of life in patients with newly diagnosed brain metastasis after treatment with intra-operative cesium-131 brachytherapy: a prospective trial. *Journal of Neuro-Oncology*, 127(1), 63–71. <https://doi.org/10.1007/s11060-015-2009-5>
424. Philip, J., Collins, A., Staker, J., & Murphy, M. (2018). I-CoPE: A pilot study of structured supportive care delivery to people with newly diagnosed high-grade glioma and their carers. *Neuro-Oncology Practice*, 6(1), 61-70.
425. Piil, K., Christensen, I. J., Grunnet, K., & Poulsen, H. S. (2019). Health-related quality of life and caregiver perspectives in glioblastoma survivors: a mixed-methods study. *BMJ Supportive & Palliative Care*. <http://dx.doi.org/10.1136/bmjspcare-2019-001777>
426. Piil, K., Jakobsen, J., Christensen, K. B., Juhler, M., Guetterman, T. C., Fetters, M. D., & Jarden, M. (2018). Needs and preferences among patients with high-grade glioma and their caregivers – A longitudinal mixed methods study. *European Journal of Cancer Care*, 27(2). <https://doi.org/10.1111/ecc.12806>
427. Piil, K., Jakobsen, J., Christensen, K. B., Juhler, M., & Jarden, M. (2015). Health-related quality of life in patients with high-grade gliomas: a quantitative longitudinal study. *Journal of Neuro-Oncology*, 124(2), 185–195. <https://doi.org/10.1007/s11060-015-1821-2>
428. Pintea, B., Kandenwein, J. A., Lorenzen, H., Boström, J. P., Daher, F., Velazquez, V., & Kristof, R. A. (2018). Factors of influence upon the SF-36-based health related quality of life of patients following surgery for petroclival and lateral posterior surface of pyramid meningiomas. *Clinical Neurology and Neurosurgery*, 166, 36–43. <https://doi.org/10.1016/j.clineuro.2018.01.016>
429. Piroth, M. D., Pinkawa, M., Holy, R., Klotz, J., Schaar, S., Stoffels, G., ... Eble, M. J. (2012). Integrated boost IMRT with FET-PET-adapted local dose escalation in glioblastomas: Results of a prospective phase II study. *Strahlentherapie Und Onkologie*, 188(4), 334–339. <https://doi.org/10.1007/s00066-011-0060-5>
430. Pollom, E. L., Fujimoto, D., Wynne, J., Seiger, K., Modlin, L. A., Jacobs, L. R., ... Soltys, S. G. (2017). Phase 1/2 Trial of 5-Fraction Stereotactic Radiosurgery With 5-mm Margins With Concurrent and Adjuvant Temozolomide in Newly Diagnosed Supratentorial Glioblastoma: Health-Related

- Quality of Life Results. *International Journal of Radiation Oncology Biology Physics*, 98(1), 123–130. <https://doi.org/10.1016/j.ijrobp.2017.01.242>
431. Porter, K. R., Menon, U., Vick, N. A., Villano, J. L., Berbaum, M. L., & Davis, F. G. (2014). Assessment of clinical and nonclinical characteristics associated with health-related quality of life in patients with high-grade gliomas: A feasibility study. *Supportive Care in Cancer*, 22(5), 1349–1362. <https://doi.org/10.1007/s00520-013-2093-z>
432. Pospisil, P., Kazda, T., Hynkova, L., Bulik, M., Dobiaskova, M., Burkon, P., ... Jancalek, R. (2017). Post-WBRT cognitive impairment and hippocampal neuronal depletion measured by in vivo metabolic MR spectroscopy: Results of prospective investigational study. *Radiotherapy and Oncology*, 122(3), 373–379. <https://doi.org/10.1016/j.radonc.2016.12.013>
433. Postma, T. J., Heimans, J. J., Luykx, S. A., Van Groenigen, C. J., Beenen, L. F. M., Hoekstra, O. S., ... Vermorken, J. B. (2000). *A phase II study of paclitaxel in chemo-naïve patients with recurrent high-grade glioma*. *Annals of Oncology* (Vol. 11).
434. Powell, C., Guerrero, D., Sardell, S., Cumins, S., Wharram, B., Traish, D., ... Brada, M. (2011). Somnolence syndrome in patients receiving radical radiotherapy for primary brain tumours: A prospective study. *Radiotherapy and Oncology*, 100(1), 131–136. <https://doi.org/10.1016/j.radonc.2011.06.028>
435. Prados, M. D., Schold, S. C., Fine, H. A., Jaeckle, K., Hochberg, F., Mechtler, L., ... Prados, M. (2003). *Neuro-Oncology A randomized, double-blind, placebo-controlled, phase 2 study of RMP-7 in combination with carboplatin administered intravenously for the treatment of recurrent malignant glioma 1*.
436. Pranckeviciene, A., Deltuva, V. P., Tamasauskas, A., & Bunevicius, A. (2017). Association between psychological distress, subjective cognitive complaints and objective neuropsychological functioning in brain tumor patients. *Clinical Neurology and Neurosurgery*, 163, 18–23. <https://doi.org/10.1016/j.clineuro.2017.10.007>
437. Pranckevičienė, A., Jurkuvėnas, V., Deltuva, V. P., Tamašauskas, A., & Bunevičius, A. (2019). Preoperative verbal memory problems and their clinical prognostic value in meningioma patients: A prospective study. *Applied Neuropsychology:Adult*, 26(6), 503–512. <https://doi.org/10.1080/23279095.2018.1450750>
438. Preusser, M., Seywald, S., Elandt, K., Kurz, C., Rottenfusser, A., Dieckmann, K., ... Marosi, C. (2012). Pilot study on sex hormone levels and fertility in women with malignant gliomas. *Journal of Neuro-Oncology*, 107(2), 387–394. <https://doi.org/10.1007/s11060-011-0761-8>
439. Pulezas, N., Khan, L., Tsao, M., Zhang, L., Lechner, B., Thavarajah, N., ... Chow, E. (2014). Fatigue scores in patients with brain metastases receiving whole brain radiotherapy. *Supportive Care in Cancer*, 22(7), 1757–1763. <https://doi.org/10.1007/s00520-014-2140-4>
440. Pulezas, N., Ray, S., Zhang, L., McDonald, R., Cella, D., Rowbottom, L., ... Chow, E. (2016). The Brain Symptom and Impact Questionnaire in brain metastases patients: a prospective long-term follow-up study. *CNS Oncology*, 5(1), 31–40. <https://doi.org/10.2217/cns.15.41>
441. Rabbani, G., Benzil, D., Wallam, M. N., Chen, B., Hoang, A., Kancherla, R., & Ahmed, T. (2007). *Anticancer Research*, 27(4C), 2729–2736.
442. Rahman, M. A., Brekke, J., Arnesen, V., Hannisdal, M. H., Navarro, A. G., Waha, A., ... & Haasz, J. (2020). Sequential bortezomib and temozolomide treatment promotes immunological responses in glioblastoma patients with positive clinical outcomes: A phase 1B study. *Immunity, Inflammation and Disease*, 8, 342–359. <https://doi.org/10.1002/iid3.315>
443. Rahman, Z., Wong, C. H., Dexter, M., Olsson, G., Wong, M., Gebisky, V., ... Bleasel, A. B. (2015). Epilepsy in patients with primary brain tumors: The impact on mood, cognition, and HRQOL. *Epilepsy and Behavior*, 48, 88–95. <https://doi.org/10.1016/j.yebeh.2015.03.016>
444. Randazzo, D. M., McSherry, F., Herndon, J. E., Affronti, M. Lou, Lipp, E. S., Flahiff, C., ... Peters, K. B. (2017). A cross sectional analysis from a single institution's experience of psychosocial distress and health-related quality of life in the primary brain tumor population. *Journal of Neuro-Oncology*, 134(2), 363–369. <https://doi.org/10.1007/s11060-017-2535-4>

445. Randolph II, D. M., McTyre, E., Klepin, H., Peiffer, A. M., Ayala-Peacock, D., Lester, S., ... Randolph, D. M. (2017). *Clinical investigation Impact of radiosurgical management of geriatric patients with brain metastases: Clinical and quality of life outcomes. Journal of Radiosurgery and SBRT* (Vol. 5).
446. Rapp, M., Schipmann, S., Hoffmann, K., Wiewrodt, R., Steiger, H.-J., Kamp, M., ... Sabel, M. (n.d.). *Impact of distress screening algorithm for psycho-oncological needs in neurosurgical patients.*
447. Ravn Munkvold, B. K., Sagberg, L. M., Jakola, A. S., & Solheim, O. (2018). Preoperative and Postoperative Headache in Patients with Intracranial Tumors. *World Neurosurgery*, *115*, e322–e330. <https://doi.org/10.1016/j.wneu.2018.04.044>
448. Reardon, D. A., Fink, K. L., Mikkelsen, T., Cloughesy, T. F., O'Neill, A., Plotkin, S., ... Nabors, L. B. (2008). Randomized phase II study of cilengitide, an integrin-targeting arginine-glycine-aspartic acid peptide, in recurrent glioblastoma multiforme. *Journal of Clinical Oncology*, *26*(34), 5610–5617. <https://doi.org/10.1200/JCO.2008.16.7510>
449. Reblin, M., Sahebjam, S., Peeri, N. C., Martinez, Y. C., Thompson, Z., & Egan, K. M. (2019). Medical Cannabis Use in Glioma Patients Treated at a Comprehensive Cancer Center in Florida. *Journal of Palliative Medicine*, *22*(10), 1202–1207. <https://doi.org/10.1089/jpm.2018.0528>
450. Reddy, K., Gaspar, L. E., Kavanagh, B. D., Waziri, A., Damek, D. M., Ney, D., ... Chen, C. (2013). Prospective evaluation of health-related quality of life in patients with glioblastoma multiforme treated on a phase II trial of hypofractionated IMRT with temozolomide. *Journal of Neuro-Oncology*, *114*(1), 111–116. <https://doi.org/10.1007/s11060-013-1159-6>
451. Reddy, N. K., Brown, F. C., Fogarasi, M. C., Yu, J. B., Hess, J., & Chiang, V. S. (2018). Long-term Quality of Life in Survivors of Brain Metastases: A Roller Coaster of Perspective. *Cureus*. <https://doi.org/10.7759/cureus.2358>
452. Regine, W. F., Schmitt, F. A., Scott, C. B., Dearth, C., Patchell, R. A., Nichols, R. C., ... Mehta, M. P. (2004). Feasibility of neurocognitive outcome evaluations in patients with brain metastases in a multi-institutional cooperative group setting: Results of Radiation Therapy Oncology Group trial BR-0018. *International Journal of Radiation Oncology Biology Physics*, *58*(5), 1346–1352. <https://doi.org/10.1016/j.ijrobp.2003.09.023>
453. Reijneveld, J. C., Sitskoorn, ; M M, Klein, ; M, Nuyen, ; J, & Taphoorn, M. J. B. (2001). *Cognitive status and quality of life in patients with suspected versus proven low-grade gliomas.*
454. Reijneveld, J. C., Taphoorn, M. J. B., Coens, C., Bromberg, J. E. C., Mason, W. P., Hoang-Xuan, K., ... Baumert, B. G. (2016). Health-related quality of life in patients with high-risk low-grade glioma (EORTC 22033-26033): a randomised, open-label, phase 3 intergroup study. *The Lancet Oncology*, *17*(11), 1533–1542. [https://doi.org/10.1016/S1470-2045\(16\)30305-9](https://doi.org/10.1016/S1470-2045(16)30305-9)
455. Renovanz, M., Gutenberg, A., Haug, M., Strittmatter, E., Mazur, J., Nadji-Ohl, M., ... Hopf, N. (2013). Postsurgical screening for psychosocial disorders in neurooncological patients. *Acta Neurochirurgica*, *155*(12), 2255–2261. <https://doi.org/10.1007/s00701-013-1884-9>
456. Renovanz, M., Hechtner, M., Janko, M., Kohlmann, K., Coburger, J., Nadji-Ohl, M., ... Hickmann, A. K. (2017). Factors associated with supportive care needs in glioma patients in the neuro-oncological outpatient setting. *Journal of Neuro-Oncology*, *133*(3), 653–662. <https://doi.org/10.1007/s11060-017-2484-y>
457. Renovanz, M., Hechtner, M., Kohlmann, K., Janko, M., Nadji-Ohl, M., Singer, S., ... Hickmann, A. K. (2018). Compliance with patient-reported outcome assessment in glioma patients: Predictors for drop out. *Neuro-Oncology Practice*, *5*(2), 129–138. <https://doi.org/10.1093/nop/npx026>
458. Renovanz, M., Hickmann, A. K., Coburger, J., Kohlmann, K., Janko, M., Reuter, A. K., ... Hechtner, M. (2018). Assessing psychological and supportive care needs in glioma patients – feasibility study on the use of the Supportive Care Needs Survey Short Form (SCNS-SF34-G) and the Supportive Care Needs Survey Screening Tool (SCNS-ST9) in clinical practice. *European Journal of Cancer Care*, *27*(1). <https://doi.org/10.1111/ecc.12598>
459. Renovanz, M., Hickmann, A. K., Nadji-Ohl, M., Keric, N., Weimann, E., Wirtz, C. R., ... & Coburger, J. (2020). Health-related quality of life and distress in elderly vs. younger patients with high-grade



- glioma—results of a multicenter study. *Supportive Care in Cancer*. <https://doi.org/10.1007/s00520-020-05354-8>
460. Renovanz, M., Maurer, D., Lahr, H., Weimann, E., Deininger, M., Wirtz, C. R., ... Coburger, J. (2018). Supportive care needs in glioma patients and their caregivers in clinical practice: Results of a multicenter cross-sectional study. *Frontiers in Neurology*, 9(SEP). <https://doi.org/10.3389/fneur.2018.00763>
461. Renovanz, M., Reitzug, L., Messing, L., Scheurich, A., Grüninger, S., Ringel, F., & Coburger, J. (2018). Patient reported feasibility and acceptance of Montreal Cognitive Assessment (MoCA) screening pre- and postoperatively in brain tumour patients. *Journal of Clinical Neuroscience*, 53, 79–84. <https://doi.org/10.1016/j.jocn.2018.04.034>
462. Renovanz, M., Soebianto, S., Tsakmaklis, H., Keric, N., Nadji-Ohl, M., Beutel, M., ... Hickmann, A. K. (2019). Evaluation of the psychological burden during the early disease trajectory in patients with intracranial tumors by the ultra-brief Patient Health Questionnaire for Depression and Anxiety (PHQ-4). *Supportive Care in Cancer*, 27(12), 4469–4477. <https://doi.org/10.1007/s00520-019-04718-z>
463. Renovanz, M., Tsakmaklis, H., Soebianto, S., Neppel, I., Nadji-Ohl, M., Beutel, M., ... Hickmann, A.-K. (2018). *Screening for distress in patients with intracranial tumors during the first 6 months after diagnosis using self-reporting instruments and an expert rating scale (the basic documentation for psycho-oncology short form-PO-Bado SF)*. *Oncotarget* (Vol. 9).
464. Reyes-Botero, G., Cartalat-Carel, S., Chinot, O. L., Barrie, M., Taillandier, L., Beauchesne, P., ... Delattre, J. (2018). Temozolomide Plus Bevacizumab in Elderly Patients with Newly Diagnosed Glioblastoma and Poor Performance Status: An ANOCEF Phase II Trial (ATAG). *The Oncologist*, 23(5), 524. <https://doi.org/10.1634/theoncologist.2017-0689>
465. Reygagne, E., Du Boisgueheneuc, F., Berger, A., & Ingrand, P. (2019). Examining the Inter Hemispheric Transfer Time Test: A new computerized cognitive test to incorporate into therapeutic strategy for patients with brain metastases? A pilot study. *Clinical and Translational Radiation Oncology*, 16, 48–54. <https://doi.org/10.1016/j.ctro.2018.11.006>
466. Richard, N. M., Bernstein, L. J., Mason, W. P., Laperriere, N., Maurice, C., Millar, B. A., ... Edelstein, K. (2019). Cognitive rehabilitation for executive dysfunction in brain tumor patients: a pilot randomized controlled trial. *Journal of Neuro-Oncology*, 142(3), 565–575. <https://doi.org/10.1007/s11060-019-03130-1>
467. Richter, A., Jenewein, J., Krayenbühl, N., Woernle, C., & Bellut, D. (2016). Are preoperative sex-related differences of affective symptoms in primary brain tumor patients associated with postoperative histopathological grading? *Journal of Neuro-Oncology*, 126(1), 151–156. <https://doi.org/10.1007/s11060-015-1950-7>
468. Roa, W., Brasher, P. M. A., Bauman, G., Anthes, M., Bruera, E., Chan, A., ... Forsyth, P. (2004). Abbreviated course of radiation therapy in older patients with glioblastoma multiforme: A prospective randomized clinical trial. *Journal of Clinical Oncology*, 22(9), 1583–1588. <https://doi.org/10.1200/JCO.2004.06.082>
469. Roa, W., Kepka, L., Kumar, N., Sinaika, V., Matiello, J., Lomidze, D., ... Fidarova, E. (2015). International Atomic Energy Agency randomized phase III study of radiation therapy in elderly and/or frail patients with newly diagnosed glioblastoma multiforme. *Journal of Clinical Oncology*, 33(35), 4145–4150. <https://doi.org/10.1200/JCO.2015.62.6606>
470. Rodin, D., Banihashemi, B., Wang, L., Lau, A., Harris, S., Levin, W., ... Wong, R. K. S. (2016). The Brain Metastases Symptom Checklist as a novel tool for symptom measurement in patients with brain metastases undergoing whole-brain radiotherapy. *Current Oncology*, 23(3), e239–e247. <https://doi.org/10.3747/co.23.2936>
471. Rogers, L. R., Rock, J. P., Sills, A. K., Vogelbaum, M. A., Suh, J. H., Ellis, T. L., ... Shaw, E. G. (2006). *Results of a phase II trial of the GliSite Radiation Therapy System for the treatment of newly diagnosed, resected single brain metastases*. *J. Neurosurg* (Vol. 105).

472. Rojas-Puentes, L. L., Gonzalez-Pinedo, M., Crismatt, A., Ortega-Gomez, A., Gamboa-Vignolle, C., Nuñez-Gomez, R., ... Arrieta, O. (2013). Phase II randomized, double-blind, placebo-controlled study of whole-brain irradiation with concomitant chloroquine for brain metastases. *Radiation Oncology*, 8(1). <https://doi.org/10.1186/1748-717X-8-209>
473. Romero, M. M., Flood, L. S., Gasiewicz, N. K., Rovin, R., & Conklin, S. (2015, December 1). Validation of the National Institutes of Health Patient-Reported Outcomes Measurement Information System Survey as a Quality-of-Life Instrument for Patients with Malignant Brain Tumors and Their Caregivers. *Nursing Clinics of North America*. W.B. Saunders. <https://doi.org/10.1016/j.cnur.2015.07.009>
474. Rooney, A. G., McNamara, S., MacKinnon, M., Fraser, M., Rampling, R., Carson, A., & Grant, R. (2013). Screening for major depressive disorder in adults with cerebral glioma: An initial validation of 3 self-report instruments. *Neuro-Oncology*, 15(1), 122–129. <https://doi.org/10.1093/neuonc/nos282>
475. Rooney, A. G., McNamara, S., MacKinnon, M., Fraser, M., Rampling, R., Carson, A., & Grant, R. (2013). Screening for major depressive disorder in adults with glioma using the PHQ-9: A comparison of patient versus proxy reports. *Journal of Neuro-Oncology*, 113(1), 49–55. <https://doi.org/10.1007/s11060-013-1088-4>
476. Roos, D. E., Smith, J. G., & Stephens, S. W. (2011). Radiosurgery versus Surgery, both with Adjuvant Whole Brain Radiotherapy, for Solitary Brain Metastases: A Randomised Controlled Trial. *Clinical Oncology*, 23(9), 646–651. <https://doi.org/10.1016/j.clon.2011.04.009>
477. Roos, D. E., Wirth, A., Burmeister, B. H., Spry, N. A., Drummond, K. J., Beresford, J. A., & McClure, B. E. (2006). Whole brain irradiation following surgery or radiosurgery for solitary brain metastases: Mature results of a prematurely closed randomized Trans-Tasman Radiation Oncology Group trial (TROG 98.05). *Radiotherapy and Oncology*, 80(3), 318–322. <https://doi.org/10.1016/j.radonc.2006.08.004>
478. Rossi, M., Ambroggi, F., Gay, L., Gallucci, M., Conti Nibali, M., Leonetti, A., ... Bello, L. (2019). Is supratotal resection achievable in low-grade gliomas? Feasibility, putative factors, safety, and functional outcome. *Journal of Neurosurgery*, 1–14. <https://doi.org/10.3171/2019.2.jns183408>
479. Rothoerl, R. D., Bernreuther, D., Woertgen, C., & Brawanski, A. (2003). The value of routine electroencephalographic recordings in predicting postoperative seizures associated with meningioma surgery. *Neurosurgical Review*, 26(2), 108–112. <https://doi.org/10.1007/s10143-002-0240-y>
480. Rowe, L., Vera, E., Acquaye, A., Crandon, S., Shah, V., Bryla, C., ... & Penas-Prado, M. (2020). The prevalence of altered body image in patients with primary brain tumors: an understudied population. *Journal of Neuro-oncology*, 147, 397-404.
481. Rudà, R., Houillier, C., Maschio, M., Reijneveld, J. C., Hellot, S., De Backer, M., ... & Grant, R. (2020). Effectiveness and tolerability of lacosamide as add-on therapy in patients with brain tumor–related epilepsy: Results from a prospective, noninterventional study in European clinical practice (VIBES). *Epilepsia*, 61(4), 647-656. <https://doi.org/10.1111/epi.16486>
482. Ruge, M. I., Ilmberger, J., Tonn, J. C., & Kreth, F. W. (2011). Health-related quality of life and cognitive functioning in adult patients with supratentorial WHO grade II glioma: Status prior to therapy. *Journal of Neuro-Oncology*, 103(1), 129–136. <https://doi.org/10.1007/s11060-010-0364-9>
483. Ruiz, J., Case, D., Enevold, G., Rosdhal, R., Tatter, S. B., Ellis, T. L., ... Lesser, G. J. (2012). A phase II trial of thalidomide and procarbazine in adult patients with recurrent or progressive malignant gliomas. *Journal of Neuro-Oncology*, 106(3), 611–617. <https://doi.org/10.1007/s11060-011-0698-y>
484. Rusbridge, S. L., Walmsley, N. C., Griffiths, S. B., Wilford, P. A., & Rees, J. H. (2013). Predicting outcomes of vocational rehabilitation in patients with brain tumours. *Psycho-Oncology*, 22(8), 1907–1911. <https://doi.org/10.1002/pon.3241>

485. Sacher, M., Meixensberger, J., & Krupp, W. (2018). Interaction of quality of life, mood and depression of patients and their informal caregivers after surgical treatment of high-grade glioma: a prospective study. *Journal of Neuro-Oncology*, *140*(2), 367–375. <https://doi.org/10.1007/s11060-018-2962-x>
486. Sagberg, L. M., Iversen, D. H., Fyllingen, E. H., Jakola, A. S., Reinertsen, I., & Solheim, O. (2019). Brain atlas for assessing the impact of tumor location on perioperative quality of life in patients with high-grade glioma: A prospective population-based cohort study. *NeuroImage: Clinical*, *21*. <https://doi.org/10.1016/j.nicl.2019.101658>
487. Sagberg, L. M., Jakola, A. S., & Solheim, O. (2014). Quality of life assessed with EQ-5D in patients undergoing glioma surgery: What is the responsiveness and minimal clinically important difference? *Quality of Life Research*, *23*(5), 1427–1434. <https://doi.org/10.1007/s11136-013-0593-4>
488. Sagberg, L. M., Solheim, O., & Jakola, A. S. (2016). Quality of survival the 1st year with glioblastoma: A longitudinal study of patient-reported quality of life. *Journal of Neurosurgery*, *124*(4), 989–997. <https://doi.org/10.3171/2015.4.JNS15194>
489. Santini, B., Talacchi, A., Squintani, G., Casagrande, F., Capasso, R., & Miceli, G. (2012). Cognitive outcome after awake surgery for tumors in language areas. *Journal of Neuro-Oncology*, *108*(2), 319–326. <https://doi.org/10.1007/s11060-012-0817-4>
490. Santini, B., Talacchi, A., Casagrande, F., Casartelli, M., Savazzi, S., Procaccio, F., & Gerosa, M. (2012). *Eligibility Criteria and Psychological Profiles in Patient Candidates for Awake Craniotomy: A Pilot Study*.
491. Scartoni, D., Amelio, D., Palumbo, P., Giacomelli, I., & Amichetti, M. (2020). Proton therapy re-irradiation preserves health-related quality of life in large recurrent glioblastoma. *Journal of Cancer Research and Clinical Oncology*, *146*(6), 1615–1622. <https://doi.org/10.1007/s00432-020-03187-w>
492. Schäfer, N., Proescholdt, M., Steinbach, J. P., Weyerbrock, A., Hau, P., Grauer, O., ... Herrlinger, U. (2018). Quality of life in the GLARIUS trial randomizing bevacizumab/irinotecan versus temozolomide in newly diagnosed, MGMT-nonmethylated glioblastoma. *Neuro-Oncology*, *20*(7), 975–985. <https://doi.org/10.1093/neuonc/nox204>
493. Schei, S., Solheim, O., Jakola, A. S., & Sagberg, L. M. (2020). Perioperative fatigue in patients with diffuse glioma. *Journal of neuro-oncology*, *147*(1), 97–107.
494. Schellart, N. A. M., Reits, D., Van Der Kleij, A. J., & Stalpers, L. J. A. (2011). Hyperbaric oxygen treatment improved neurophysiologic performance in brain tumor patients after neurosurgery and radiotherapy: A preliminary report. *Cancer*, *117*(15), 3434–3444. <https://doi.org/10.1002/cncr.25874>
495. Schepers, V. P., Van Der Vossen, S., Der Sprenkel, V., Berkelbach, J. W., Visser-Meily, J., & Post, M. W. (2018). Participation restrictions in patients after surgery for cerebral meningioma. *Journal of Rehabilitation Medicine*, *50*(10), 879–885.
496. Schmidinger, M., Linzmayer, L., Becherer, A., Fazeny-Doerner, B., Fakhrai, N., Prayer, D., ... Marosi, C. (2003). *Psychometric-and quality-of-life assessment in long-term glioblastoma survivors*. *Journal of Neuro-Oncology* (Vol. 63).
497. Scott, C., Suh, J., Stea, B., Nabid, A., & Hackman, J. (2007). Improved survival, quality of life, and quality-adjusted survival in breast cancer patients treated with efaproxiral (Efaproxyn) plus whole-brain radiation therapy for brain metastases. *American Journal of Clinical Oncology: Cancer Clinical Trials*, *30*(6), 580–587. <https://doi.org/10.1097/COC.0b013e3180653c0d>
498. Seekatz, B., Lukaszczik, M., Löhr, M., Ehrmann, K., Schuler, M., Keßler, A. F., ... van Oorschot, B. (2017). Screening for symptom burden and supportive needs of patients with glioblastoma and brain metastases and their caregivers in relation to their use of specialized palliative care. *Supportive Care in Cancer*, *25*(9), 2761–2770. <https://doi.org/10.1007/s00520-017-3687-7>
499. Sehlen, S., Sehlen, S., Lenk, M., Hollenhorst, H., Schymura, B., Aydemir, U., ... Dühmke, E. (2003). *Dokumentation und Evaluation der Weiterbildung Original Article · Originalarbeit*

*Schlüsselwörter Lebensqualität · FACT-G · Strahlentherapie · Hirntumoren · Überleben Quality of Life (QoL) as Predictive Mediator Variable for Survival in Patients with Intracerebral Neoplasma During Radiotherapy.*

500. Seibl-Leven, M., von Reeken, C., Goldbrunner, R., Grau, S., Ruge, M. I., Galldiks, N., ... Golla, H. (2018). Clinical routine assessment of palliative care symptoms and concerns and caregiver burden in glioblastoma patients: an explorative field study. *Journal of Neuro-Oncology*, 138(2), 321–333. <https://doi.org/10.1007/s11060-018-2800-1>
501. Semerdjieva, M. A. (n.d.). *Assessment of the effect of palliative radiotherapy for cancer patients with intracranial metastases using EORTC-QOL-C30 questionnaire.*
502. Shapey, J., Jung, J., Barkas, K., Gullan, R., Barazi, S., Bentley, R., ... & Thomas, N. W. (2019). A single centre's experience of managing sphenoidal meningiomas: lessons for recurrent tumour surgery. *Acta neurochirurgica*, 161(8), 1657-1667.
503. Shaw, E. G., Rosdhal, R., D'Agostino, R. B., Lovato, J., Naughton, M. J., Robbins, M. E., & Rapp, S. R. (2006). Phase II study of donepezil in irradiated brain tumor patients: Effect on cognitive function, mood, and quality of life. *Journal of Clinical Oncology*, 24(9), 1415–1420. <https://doi.org/10.1200/JCO.2005.03.3001>
504. Sheehan, J. P., Grills, I., Chiang, V. L., Dong, H., Berg, A., Warnick, R. E., ... Kavanagh, B. (2018). Quality of life outcomes for brain metastasis patients treated with stereotactic radiosurgery: pre-procedural predictive factors from a prospective national registry. *Journal of Neurosurgery*, 131(6), 1848–1854. <https://doi.org/10.3171/2018.8.JNS181599>
505. Sherman, J. C., Colvin, M. K., Mancuso, S. M., Batchelor, T. T., Oh, K. S., Loeffler, J. S., ... Shih, H. A. (2016). Neurocognitive effects of proton radiation therapy in adults with low-grade glioma. *Journal of Neuro-Oncology*, 126(1), 157–164. <https://doi.org/10.1007/s11060-015-1952-5>
506. Shields, L. E., Choucair, A., & Choucair, A. (2013). Quality of life measures as a preliminary clinical indicator in patients with primary brain tumors. *Surgical Neurology International*, 4(1), 48. <https://doi.org/10.4103/2152-7806.110143>
507. Shih, H. A., Sherman, J. C., Nachtigall, L. B., Colvin, M. K., Fullerton, B. C., Daartz, J., ... Yeap, B. Y. (2015). Proton therapy for low-grade gliomas: Results from a prospective trial. *Cancer*, 121(10), 1712–1719. <https://doi.org/10.1002/cncr.29237>
508. Simpson, G. K., Koh, E. S., Whiting, D., Wright, K. M., Simpson, T., Firth, R., ... Younan, K. (2015). Frequency, clinical correlates, and ratings of behavioral changes in primary brain tumor patients: A preliminary investigation. *Frontiers in Oncology*, 5(APR). <https://doi.org/10.3389/fonc.2015.00078>
509. Singer, S., Roick, J., Danker, H., Kortmann, R. D., Papsdorf, K., Taubenheim, S., ... Meixensberger, J. (2018). Psychiatric co-morbidity, distress, and use of psycho-social services in adult glioma patients—a prospective study. *Acta Neurochirurgica*, 160(6), 1187–1194. <https://doi.org/10.1007/s00701-018-3527-7>
510. Skalicky, A. M., Rentz, A. M., Liu, Z., Wheless, J. W., Pelletier, C. L., Dunn, D. W., ... Pashos, C. (2015). The burden of subependymal giant cell astrocytomas associated with tuberous sclerosis complex: Results of a patient and caregiver survey. *Journal of Child Neurology*, 30(5), 563–569. <https://doi.org/10.1177/0883073814523318>
511. Skeie, B. S., Eide, G. E., Flatebø, M., Heggdal, J. I., Larsen, E., Bragstad, S., ... Enger, P. Ø. (2017). Quality of life is maintained using Gamma Knife radiosurgery: A prospective study of a brain metastases patient cohort. *Journal of Neurosurgery*, 126(3), 708–725. <https://doi.org/10.3171/2015.10.JNS15801>
512. Smith, C. J., Myers, C. S., Chapple, K. M., & Smith, K. A. (2016). Long-Term follow-up of 25 cases of biopsy-Proven radiation necrosis or post-Radiation treatment effect treated with magnetic resonance-Guided laser interstitial thermal therapy. *Clinical Neurosurgery*, 79, S59–S72. <https://doi.org/10.1227/NEU.0000000000001438>

513. Sneeuw, K. C. A., Aaronson, N. K., Osoba, D., Muller, M. J., Hsu, M-A., Yung, W. K. A., ... Newlands, E. S. (1997). The use of significant others as proxy raters of the quality of life of patients with brain cancer. *Medical Care*, 35(5), 490-506.
514. Soffiatti, R., Kocher, M., Abacioglu, U. M., Villa, S., Fauchon, F., Baumert, B. G., ... Bottomley, A. (2013). A European Organisation for Research and Treatment of Cancer phase III trial of adjuvant whole-brain radiotherapy versus observation in patients with one to three brain metastases from solid tumors after surgical resection or radiosurgery: Quality-of-life results. *Journal of Clinical Oncology*, 31(1), 65–72. <https://doi.org/10.1200/JCO.2011.41.0639>
515. Souhami, L., Seiferheld, W., Brachman, D., Podgorsak, E. B., Werner-Wasik, M., Lustig, R., ... Curran, W. J. (2004). Randomized comparison of stereotactic radiosurgery followed by conventional radiotherapy with carmustine to conventional radiotherapy with carmustine for patients with glioblastoma multiforme: Report of Radiation Therapy Oncology Group 93-05 protocol. *International Journal of Radiation Oncology Biology Physics*, 60(3), 853–860. <https://doi.org/10.1016/j.ijrobp.2004.04.011>
516. Starkweather, A. R., Sherwood, P., Lyon, D. E., Bovbjerg, D. H., Broaddus, W. C., Elswick, R. K., & Sturgill, J. (2014). Depressive symptoms and cytokine levels in Serum and Tumor Tissue in patients with an Astrocytoma: A pilot study. *BMC Research Notes*, 7(1). <https://doi.org/10.1186/1756-0500-7-423>
517. Steinbach, J. P., Blaicher, H.-P., Herrlinger, ; U, Wick, ; W, Nä Gele, ; T, Meyermann, ; R, ... Weller, M. (2006). *Surviving glioblastoma for more than 5 years: The patient's perspective*. *NEUROLOGY* (Vol. 66).
518. Steinmann, D., Vordermark, D., Geinitz, H., Aschoff, R., Bayerl, A., Gerstein, J., ... Schäfer, C. (2013). Proxy assessment of patients before and after radiotherapy for brain metastases: Results of a prospective study using the DEGRO brain module. *Strahlentherapie Und Onkologie*, 189(1), 47–53. <https://doi.org/10.1007/s00066-012-0239-4>
519. Steinmann, D., Paelecke-Habermann, Y., Geinitz, H., Aschoff, R., Bayerl, A., Bölling, T., ... Vordermark, D. (2012). Prospective evaluation of quality of life effects in patients undergoing palliative radiotherapy for brain metastases. *BMC Cancer*, 12. <https://doi.org/10.1186/1471-2407-12-283>
520. Steinmann, D., Schäfer, C., Van Oorschot, B., Wypior, H. J., Bruns, F., Bölling, T., ... Vordermark, D. (2009). Lebensqualitäts-(LQ-)Effekte der Strahlentherapie von Hirnmetastasen. Prospektive Pilotstudie des DEGRO-LQ-Arbeitskreises. *Strahlentherapie Und Onkologie*, 185(3), 190–197. <https://doi.org/10.1007/s00066-009-1904-0>
521. Steinmann, D., Vordermark, D., Gerstenberg, W., Aschoff, R., Gharbi, N., Müller, A., ... & Geinitz, H. (2020). Quality of life in patients with limited (1–3) brain metastases undergoing stereotactic or whole brain radiotherapy. *Strahlentherapie und Onkologie*, 196(1), 48-57.
522. Stöckelmaier, L., Renovanz, M., König, J., Nickel, K., Hickmann, A. K., Mayer-Steinacker, R., ... Coburger, J. (2017). Therapy for Recurrent High-Grade Gliomas: Results of a Prospective Multicenter Study on Health-Related Quality of Life. *World Neurosurgery*, 102, 383–399. <https://doi.org/10.1016/j.wneu.2017.02.061>
523. Struik, K., Klein, M., Heimans, J. J., Gielissen, M. F., Bleijenberg, G., Taphoorn, M. J., ... Postma, T. J. (2009). Fatigue in low-grade glioma. *Journal of Neuro-Oncology*, 92(1), 73–78. <https://doi.org/10.1007/s11060-008-9738-7>
524. Stupp, R., Wong, E. T., Kanner, A. A., Steinberg, D., Engelhard, H., Heidecke, V., ... Gutin, P. H. (2012). NovoTTF-100A versus physician's choice chemotherapy in recurrent glioblastoma: A randomised phase III trial of a novel treatment modality. *European Journal of Cancer*, 48(14), 2192–2202. <https://doi.org/10.1016/j.ejca.2012.04.011>
525. Suchorska, B., Weller, M., Tabatabai, G., Senft, C., Hau, P., Sabel, M. C., ... Wirsching, H. G. (2016). Complete resection of contrast-enhancing tumor volume is associated with improved survival in recurrent glioblastoma - Results from the DIRECTOR trial. *Neuro-Oncology*, 18(4), 549–556. <https://doi.org/10.1093/neuonc/nov326>



526. Sun, Y. N., Zhang, Z. Y., Zeng, Y. C., Chi, F., Jin, X. Y., & Wu, R. (2016). Comparative efficacy of whole-brain radiotherapy with and without elemene liposomes in patients with multiple brain metastases from non-small-cell lung carcinoma. *Current Oncology*, *23*(4), e377–e382. <https://doi.org/10.3747/co.23.3183>
527. Surbeck, W., Herbet, G., & Duffau, H. (2015). Sexuality after surgery for diffuse low-grade glioma. *Neuro-Oncology*, *17*(4), 574–579. <https://doi.org/10.1093/neuonc/nou326>
528. Suteu, P., Fekete, Z., Todor, N., & Nagy, V. (2019). Survival and quality of life after whole brain radiotherapy with 3D conformal boost in the treatment of brain metastases. *Medicine and Pharmacy Reports*, *92*(1), 43–51. <https://doi.org/10.15386/cjmed-1040>
529. Szpringer, M., Oledzka, M., & Amann, B. L. (2018). A Non-randomized controlled trial of EMDR on affective symptoms in patients with Glioblastoma multiforme. *Frontiers in Psychology*, *9*(MAY). <https://doi.org/10.3389/fpsyg.2018.00785>
530. Tabrizi, S., Yeap, B. Y., Sherman, J. C., Nachtigall, L. B., Colvin, M. K., Dworkin, M., ... Shih, H. A. (2019). Long-term outcomes and late adverse effects of a prospective study on proton radiotherapy for patients with low-grade glioma. *Radiotherapy and Oncology*, *137*, 95–101. <https://doi.org/10.1016/j.radonc.2019.04.027>
531. Talacchi, A., Santini, B., Savazzi, S., & Gerosa, M. (2011). Cognitive effects of tumour and surgical treatment in glioma patients. *Journal of Neuro-Oncology*, *103*(3), 541–549. <https://doi.org/10.1007/s11060-010-0417-0>
532. Tanti, M. J., Marson, A. G., & Jenkinson, M. D. (2017). Epilepsy and adverse quality of life in surgically resected meningioma. *Acta Neurologica Scandinavica*, *136*(3), 246–253. <https://doi.org/10.1111/ane.12711>
533. Tao, J., Gao, Z., Huang, R., & Li, H. (2019). Therapeutic effect of combined hyperbaric oxygen and radiation therapy for single brain metastasis and its influence on osteopontin and MMP-9. *Experimental and Therapeutic Medicine*, *17*(1), 465–471. <https://doi.org/10.3892/etm.2018.6930>
534. Taphoorn, M. J. B., Claassens, L., Aaronson, N. K., Coens, C., Mauer, M., Osoba, D., ... Bottomley, A. (2010). An international validation study of the EORTC brain cancer module (EORTC QLQ-BN20) for assessing health-related quality of life and symptoms in brain cancer patients. *European Journal of Cancer*, *46*(6), 1033–1040. <https://doi.org/10.1016/j.ejca.2010.01.012>
535. Taphoorn, M. J. B., Dirven, L., Kanner, A. A., Lavy-Shahaf, G., Weinberg, U., Taillibert, S., ... Stupp, R. (2018). Influence of treatment with tumor-treating fields on health-related quality of life of patients with newly diagnosed glioblastoma a secondary analysis of a randomized clinical trial. *JAMA Oncology*, *4*(4), 495–504. <https://doi.org/10.1001/jamaoncol.2017.5082>
536. Taphoorn, M. J., Heimans, J. J., Snoek, F. J., Lindeboom, J., Oosterink, B., Wolbers, J. G., ... B Taphoorn J J Heimans B Oosterink, M. J. (1992). Assessment of quality of life in patients treated for low-grade glioma: a preliminary report. *Neurosurgery, and Psychiatry*, *55*.
537. Taphoorn, M. J. B., Henriksson, R., Bottomley, A., Cloughesy, T., Wick, W., Mason, W. P., ... Chinot, O. L. (2015). Health-related quality of life in a randomized phase III study of bevacizumab, temozolomide, and radiotherapy in newly diagnosed glioblastoma. *Journal of Clinical Oncology*, *33*(19), 2166–2175. <https://doi.org/10.1200/JCO.2014.60.3217>
538. Taphoorn, M. J., Klein Schiphorst, A., Snoek, F. J., Lindeboom, J., Wolbers, J. G., M F Karim, A. B., ... & Heimans, J. J. (1994). Cognitive Functions and Quality of Life in Patients with Low-Grade Gliomas: The Impact of Radiotherapy. *Ann. Neurol.*, *36*, 48-54.
539. Taphoorn, M. J. B., Stupp, R., Coens, C., Osoba, D., Kortmann, R., van den Bent, M. J., ... Bottomley, A. (2005). Health-related quality of life in patients with glioblastoma: a randomised controlled trial. *The Lancet Oncology*, *6*(12), 937-944.
540. Taphoorn, M. J. B., van den Bent, M. J., Mauer, M. E. L., Coens, C., Delattre, J. Y., Brandes, A. A., ... Bottomley, A. (2007). Health-related quality of life in patients treated for anaplastic oligodendroglioma with adjuvant chemotherapy: Results of a European Organisation for

- Research and Treatment of Cancer randomized clinical trial. *Journal of Clinical Oncology*, 25(36), 5723–5730. <https://doi.org/10.1200/JCO.2007.12.7514>
541. Taychakhoonavudh, S., Franzini, L., Lal, L. S., Chang, E. L., Meyers, C. A., Wefel, J. S., & Swint, J. M. (2014). Comparison of time trade-off utility with neurocognitive function, performance status, and quality of life measures in patients with metastatic brain disease. *Journal of Radiation Oncology*, 3(2), 215–221. <https://doi.org/10.1007/s13566-013-0093-8>
542. Teke, F., Bucaktepe, P. G. E., Kibrıslı, E., Demir, M., Ibiloglu, A. O., & Inal, A. (2016). Quality of life, psychological burden, and sleep quality in patients with brain metastasis undergoing whole brain radiation therapy. *Clinical Journal of Oncology Nursing*, 20(5), E118–E125. <https://doi.org/10.1188/16.CJON.AE-02>
543. Terasaki, M., Eto, T., Nakashima, S., Okada, Y., Ogo, E., Sugita, Y., ... Shigemori, M. (2011). A pilot study of hypofractionated radiation therapy with temozolomide for adults with glioblastoma multiforme. *Journal of Neuro-Oncology*, 102(2), 247–253. <https://doi.org/10.1007/s11060-010-0306-6>
544. Thavarajah, N., Bedard, G., Zhang, L., Cella, D., Beaumont, J. L., Tsao, M., ... Chow, E. (2014). Psychometric validation of the functional assessment of cancer therapy-brain (FACT-Br) for assessing quality of life in patients with brain metastases. *Supportive Care in Cancer*, 22(4), 1017–1028. <https://doi.org/10.1007/s00520-013-2060-8>
545. Thavarajah, N., Ray, S., Bedard, G., Zhang, L., Cella, D., Wong, E., ... Chow, E. (2015). Psychometric validation of the Brain Symptom and Impact Questionnaire (BASIQ) version 1.0 to assess quality of life in patients with brain metastases. *CNS Oncology*, 4(1), 11–23. <https://doi.org/10.2217/cns.14.49>
546. Tian, X., Li, L., & Luo, J. (2018). Clinical outcome and safety of different approaches to surgical resection for medial temporal lobe gliomas. *Int J Clin Exp Med*, 11(6), 6234–6239.
547. Timmer, M., Seibl-Leven, M., Wittenstein, K., Grau, S., Stavrinou, P., Röhn, G., ... Goldbrunner, R. (2019). Long-Term Outcome and Health-Related Quality of Life of Elderly Patients After Meningioma Surgery. *World Neurosurgery*, 125, e697–e710. <https://doi.org/10.1016/j.wneu.2019.01.158>
548. Tran, A. D., Fogarty, G., Nowak, A. K., Diaby, V., Hong, A., Watts, C., & Morton, R. L. (2020). Cost-Effectiveness of Subsequent Whole-Brain Radiotherapy or Hippocampal-Avoidant Whole-Brain Radiotherapy Versus Stereotactic Radiosurgery or Surgery Alone for Treatment of Melanoma Brain Metastases. *Applied Health Economics and Health Policy*. <https://doi.org/10.1007/s40258-020-00560-1>
549. Trejnowska, A., Goodall, K., Rush, R., Ellison, M., & McVittie, C. (2020). The relationship between adult attachment and coping with brain tumour: the mediating role of social support. *Psycho-Oncology*, 29(4), 729–736.
550. Tsao, M., Barnes, E., Danjoux, C., Sahgal, A., Soliman, H., & Chow, E. (2013). The Functional Assessment of Cancer Therapy-Brain (FACT-Br) for assessing quality of life in patients with brain metastases: A comparison of recall periods. *Journal of Pain Management*, 6(3), 223.
551. Tuettenberg, J., Grobholz, R., Korn, T., Wenz, F., Erber, R., & Vajkoczy, P. (2005). Continuous low-dose chemotherapy plus inhibition of cyclooxygenase-2 as an antiangiogenic therapy of glioblastoma multiforme. *Journal of Cancer Research and Clinical Oncology*, 131(1), 31–40. <https://doi.org/10.1007/s00432-004-0620-5>
552. Twelves, C., Cortés, J., O’Shaughnessy, J., Awada, A., Perez, E. A., Im, S. –A, ... Rugo, H. S. (2017). Health-related quality of life in patients with locally recurrent or metastatic breast cancer treated with etirinotecan pegol versus treatment of physician’s choice: Results from the randomised phase III BEACON trial. *European Journal of Cancer*, 76, 205–215. <https://doi.org/10.1016/j.ejca.2017.02.011>
553. Umezaki, S., Shinoda, Y., Mukasa, A., Tanaka, S., Takayanagi, S., Oka, H., ... & Yoshino, M. (2020). Factors associated with health-related quality of life in patients with glioma: impact of symptoms

- and implications for rehabilitation. *Japanese Journal of Clinical Oncology*. <https://doi.org/10.1093/jjco/hyaa068>
554. Vaitkiene, P., Pranckeviciene, A., Stakaitis, R., Steponaitis, G., Tamasauskas, A., & Bunevicius, A. (2019). Association of miR-34a expression with quality of life of glioblastoma patients: A prospective study. *Cancers*, *11*(3). <https://doi.org/10.3390/cancers11030300>
555. van Ark, T. J., Klimek, M., de Smalen, P., Vincent, A. J. P. E., & Stolker, R. J. (2018). Anxiety, memories and coping in patients undergoing intracranial tumor surgery. *Clinical Neurology and Neurosurgery*, *170*, 132–139. <https://doi.org/10.1016/j.clineuro.2018.05.013>
556. van den Bent, M. J., Baumert, B., Erridge, S. C., Vogelbaum, M. A., Nowak, A. K., Sanson, M., ... Kros, J. M. (2017). Interim results from the CATNON trial (EORTC study 26053-22054) of treatment with concurrent and adjuvant temozolomide for 1p/19q non-co-deleted anaplastic glioma: a phase 3, randomised, open-label intergroup study. *The Lancet*, *390*(10103), 1645–1653. [https://doi.org/10.1016/S0140-6736\(17\)31442-3](https://doi.org/10.1016/S0140-6736(17)31442-3)
557. van der Linden, S. D., Gehring, K., De Baene, W., Emons, W. H. M., Rutten, G. J. M., & Sitskoorn, M. M. (2020). Assessment of executive functioning in patients with meningioma and low-grade glioma: A comparison of self-report, proxy-report, and test performance. *Journal of the International Neuropsychological Society*, *26*(2), 187-196.
558. van der Linden, S. D., Gehring, K., Rutten, G. J. M., Kop, W. J., & Sitskoorn, M. M. (2020). Prevalence and correlates of fatigue in patients with meningioma before and after surgery. *Neuro-Oncology Practice*, *7*(1), 77-85. <https://doi.org/10.1093/nop/npz023>
559. van der Linden, S. D., Sitskoorn, M. M., Rutten, G. J. M., & Gehring, K. (2018). Feasibility of the evidence-based cognitive telerehabilitation program Remind for patients with primary brain tumors. *Journal of Neuro-Oncology*, *137*(3), 523–532. <https://doi.org/10.1007/s11060-017-2738-8>
560. van der Meer, P. B., Habets, E. J. J., Wiggenraad, R. G., Verbeek-de Kanter, A., Lycklama à Nijeholt, G. J., Zwinkels, H., ... Taphoorn, M. J. B. (2018). Individual changes in neurocognitive functioning and health-related quality of life in patients with brain oligometastases treated with stereotactic radiotherapy. *Journal of Neuro-Oncology*, *139*(2), 359–368. <https://doi.org/10.1007/s11060-018-2868-7>
561. Van der Meulen, M., Bakunina, K., Nijland, M., Minnema, M. C., Cull, G., Stevens, W. B. C., ... & Taphoorn, M. J. B. (2020). Health-related quality of life after chemotherapy with or without rituximab in primary central nervous system lymphoma patients: results from a randomised phase III study. *Annals of Oncology*, *31*(8), 1046-1055.
562. van der Vossen, S., Schepers, V. P. M., Van Der Sprenkel, J. W. B., Visser-Meily, J. M. A., & Post, M. W. M. (2014). Cognitive and emotional problems in patients after cerebral meningioma surgery. *Journal of Rehabilitation Medicine*, *46*(5), 430–437. <https://doi.org/10.2340/16501977-1795>
563. van Lonkhuizen, P. J. C., Rijnen, S. J. M., van der Linden, S. D., Rutten, G. J. M., Gehring, K., & Sitskoorn, M. M. (2019). Subjective cognitive functioning in patients with a meningioma: Its course and association with objective cognitive functioning and psychological symptoms. *Psycho-Oncology*, *28*(8), 1654–1662. <https://doi.org/10.1002/pon.5136>
564. Van Nieuwenhuizen, D., Ambachtsheer, N., Heimans, J. J., Reijneveld, J. C., Peerdeman, S. M., & Klein, M. (2013). Neurocognitive functioning and health-related quality of life in patients with radiologically suspected meningiomas. *Journal of Neuro-Oncology*, *113*(3), 433–440. <https://doi.org/10.1007/s11060-013-1132-4>
565. van Nieuwenhuizen, D., Klein, M., Stalpers, L. J. A., Leenstra, S., Heimans, J. J., & Reijneveld, J. C. (2007). Differential effect of surgery and radiotherapy on neurocognitive functioning and health-related quality of life in WHO grade I meningioma patients. *Journal of Neuro-Oncology*, *84*(3), 271–278. <https://doi.org/10.1007/s11060-007-9366-7>
566. van Nieuwenhuizen, D., Slot, K. M., Klein, M., Verbaan, D., Aliaga, E. S., Heimans, J. J., ... Reijneveld, J. C. (2019). The association between preoperative edema and postoperative



- cognitive functioning and health-related quality of life in WHO grade I meningioma patients. *Acta Neurochirurgica*, 161(3), 579–588. <https://doi.org/10.1007/s00701-019-03819-2>
567. Vassiliou, V., Satoh, T., Foro, P., Ma, B. B., Chie, W. C., Sahgal, A., & Chow, E. (2013). Comparison of baseline quality of life scores in patients with bone and brain metastases as assessed using the EORTC QLQ-C15-PAL. *Journal of Pain Management*, 6(2), 151.
568. Veilleux, N., Goffaux, P., Boudrias, M., Mathieu, D., Daigle, K., & Fortin, D. D. (2010). Quality of life in neurooncology - Age matters: Clinical article. *Journal of Neurosurgery*, 113(2), 325–332. <https://doi.org/10.3171/2010.2.JNS091707>
569. Vera, E., Acquaye, A. A., Mendoza, T. R., Gilbert, M. R., & Armstrong, T. S. (2018). Relationship between symptom burden and health status: Analysis of the MDASI-BT and EQ-5D. *Neuro-Oncology Practice*, 5(1), 56–63. <https://doi.org/10.1093/nop/npx010>
570. Verhaak, E., Gehring, K., Hanssens, P. E. J., & Sitskoorn, M. M. (2019). Health-related quality of life of patients with brain metastases selected for stereotactic radiosurgery. *Journal of Neuro-Oncology*, 143(3), 537–546. <https://doi.org/10.1007/s11060-019-03186-z>
571. Verhoef, M. J., Hagen, N., Pelletier, G., & Forsyth, P. (1999). *Alternative therapy use in neurologic diseases Use in brain tumor patients*.
572. Verhaak, E., Schimmel, W. C., Sitskoorn, M. M., Bakker, M., Hanssens, P. E., & Gehring, K. (2019). Multidimensional assessment of fatigue in patients with brain metastases before and after Gamma Knife radiosurgery. *Journal of neuro-oncology*, 144(2), 377–384.
573. Waagemans, M. L., Van Nieuwenhuizen, D., Dijkstra, M., Wumkes, M., Dirven, C. M. F., Leenstra, S., ... Stalpers, L. J. A. (2011). Long-term impact of cognitive deficits and epilepsy on quality of life in patients with low-grade meningiomas. *Neurosurgery*, 69(1), 72–78. <https://doi.org/10.1227/NEU.0b013e318212badb>
574. Wagner, A., Shiban, Y., Lange, N., Joerger, A. K., Hoffmann, U., Meyer, B., & Shiban, E. (2019). The relevant psychological burden of having a benign brain tumor: A prospective study of patients undergoing surgical treatment of cranial meningiomas. *Journal of Neurosurgery*, 131(6), 1840–1847. <https://doi.org/10.3171/2018.8.JNS181343>
575. Walker, M., Brown, J., Brown, K., Gregor, A., Whittle, I. R., & Grant, R. (2003). *Practical problems with the collection and interpretation of serial quality of life assessments in patients with malignant glioma*. *Journal of Neuro-Oncology* (Vol. 63).
576. Walker, M. S., Wong, W., Ravelo, A., Miller, P. J. E., & Schwartzberg, L. S. (2018). Effect of Brain Metastasis on Patient-Reported Outcomes in Advanced NSCLC Treated in Real-World Community Oncology Settings. *Clinical Lung Cancer*, 19(2), 139–147. <https://doi.org/10.1016/j.clc.2017.10.003>
577. Walter, J., Kuhn, S. A., Waschke, A., Kalff, R., & Ewald, C. (2011). Operative treatment of subcortical metastatic tumours in the central region. *Journal of Neuro-Oncology*, 103(3), 567–573. <https://doi.org/10.1007/s11060-010-0420-5>
578. Wang, M., Cairncross, G., Shaw, E., Jenkins, R., Scheithauer, B., Brachman, D., ... Curran, W. (2010). Cognition and Quality of Life After Chemotherapy Plus Radiotherapy (RT) vs. RT for Pure and Mixed Anaplastic Oligodendrogliomas: Radiation Therapy Oncology Group Trial 9402. *International Journal of Radiation Oncology Biology Physics*, 77(3), 662–669. <https://doi.org/10.1016/j.ijrobp.2009.06.004>
579. Wang, Q., Qi, F., Song, X., Di, J., Zhang, L., Zhou, Y., ... Yu, Y. (2018). A prospective longitudinal evaluation of cognition and depression in postoperative patients with high-grade glioma following radiotherapy and chemotherapy. *Journal of Cancer Research and Therapeutics*, 14(12), S1048–S1051. <https://doi.org/10.4103/0973-1482.199431>
580. Wang, X., Li, J., Chen, J., Fan, S., Chen, W., Liu, F., ... Hu, X. (2018). Health-Related Quality of Life and Posttraumatic Growth in Low-Grade Gliomas in China: A Prospective Study. *World Neurosurgery*, 111, e24–e31. <https://doi.org/10.1016/j.wneu.2017.11.122>
581. Wang, Y., Huang, M., Jiao, J. T., Wu, Y. L., Ouyang, T. H., Huang, J., ... Li, C. L. (2014). Relationship between concentrations of IGF-1 and IGFBP-3 and preoperative depression risk, and effect of

- psychological intervention on outcomes of high-grade glioma patients with preoperative depression in a 2-year prospective study. *Medical Oncology*, 31(5). <https://doi.org/10.1007/s12032-014-0921-8>
582. Wasilewski, A., Serventi, J., Ibegbu, C., Wychowski, T., Burke, J., & Mohile, N. (2020). Epilepsy education in gliomas: engaging patients and caregivers to improve care. *Supportive Care in Cancer*, 28(3), 1405-1409.
583. Weber, D. C., Caparrotti, F., Laouti, M., & Malek, K. (2011). Simultaneous in-field boost for patients with 1 to 4 brain metastasis/es treated with volumetric modulated arc therapy: A prospective study on quality-of-life. *Radiation Oncology*, 6(1). <https://doi.org/10.1186/1748-717X-6-79>
584. Weitzner, M. A., Meyers, C. A., & Byrne, K. (n.d.). *Psychosocial functioning and quality of life in patients with primary brain tumors*.
585. Weitzner, M. A., Meyers, C. A., Gelke, C. K., Byrne, K. S., Levin, V. A., & Cella, D. F. (1995). The functional assessment of cancer therapy (FACT) scale. Development of a brain subscale and revalidation of the general version (FACT-G) in patients with primary brain tumors. *Cancer*, 75(5), 1151–1161. [https://doi.org/10.1002/1097-0142\(19950301\)75:5<1151::AID-CNCR2820750515>3.0.CO;2-Q](https://doi.org/10.1002/1097-0142(19950301)75:5<1151::AID-CNCR2820750515>3.0.CO;2-Q)
586. Weller, M., Tatabai, G., Kästner, B., Felsberg, J., Steinbach, J. P., Wick, A., ... Reifenberger, G. (2015). MGMT promoter methylation is a strong prognostic biomarker for benefit from dose-intensified temozolomide rechallenge in progressive Glioblastoma: The DIRECTOR Trial. *Clinical Cancer Research*, 21(9), 2057–2064. <https://doi.org/10.1158/1078-0432.CCR-14-2737>
587. Weller, J., Tzaridis, T., Mack, F., Steinbach, J. P., Schlegel, U., Hau, P., ... & Uhl, M. (2019). Health-related quality of life and neurocognitive functioning with lomustine–temozolomide versus temozolomide in patients with newly diagnosed, MGMT-methylated glioblastoma (CeTeG/NOA-09): a randomised, multicentre, open-label, phase 3 trial. *The Lancet Oncology*, 20(10), 1444-1453.
588. Wen, P. Y., Reardon, D. A., Armstrong, T. S., Phuphanich, S., Aiken, R. D., Landolfi, J. C., ... & Markert, J. M. (2019). A randomized double-blind placebo-controlled phase II trial of dendritic cell vaccine ICT-107 in newly diagnosed patients with glioblastoma. *Clinical Cancer Research*, 25(19), 5799-5807.
589. Westphal, M., Heese, O., Steinbach, J. P., Schnell, O., Schackert, G., Mehdorn, M., ... Pietsch, T. (2015). A randomised, open label phase III trial with nimotuzumab, an anti-epidermal growth factor receptor monoclonal antibody in the treatment of newly diagnosed adult glioblastoma. *European Journal of Cancer*, 51(4), 522–532. <https://doi.org/10.1016/j.ejca.2014.12.019>
590. Whittle, I. R., Midgley, S., Georges, H., Pringle, A. M., & Taylor, R. (2005). Patient perceptions of “awake” brain tumour surgery. *Acta Neurochirurgica*, 147(3). <https://doi.org/10.1007/s00701-004-0445-7>
591. Whittle, I. R., Scotland, J., Dengu, F., Anpalakhan, S., & Deary, I. J. (2012). Preoperative quality of life in patients with degenerative spinal disorders: Many are worse than patients with brain tumours and cancer. *British Journal of Neurosurgery*, 26(4), 460–465. <https://doi.org/10.3109/02688697.2011.641618>
592. Whitton, A. C., Rhydderch, H., Furlong, W., Feeny, D., & Barr, R. D. (1997). Self-reported comprehensive health status of adult brain tumor patients using the health utilities index. *Cancer*, 80(2), 258–265. [https://doi.org/10.1002/\(SICI\)1097-0142\(19970715\)80:2<258::AID-CNCR14>3.0.CO;2-T](https://doi.org/10.1002/(SICI)1097-0142(19970715)80:2<258::AID-CNCR14>3.0.CO;2-T)
593. Wick, W., Fricke, H., Junge, K., Kobayakov, G., Martens, T., Heese, O., ... Combs, S. E. (2014). A phase II, randomized, study of weekly APG101+reirradiation versus reirradiation in progressive glioblastoma. *Clinical Cancer Research*, 20(24), 6304–6313. <https://doi.org/10.1158/1078-0432.CCR-14-0951-T>

594. Wick, W., Gorlia, T., Bendszus, M., Taphoorn, M., Sahm, F., Harting, I., ... Van Den Bent, M. J. (2017). Lomustine and bevacizumab in progressive glioblastoma. *New England Journal of Medicine*, 377(20), 1954–1963. <https://doi.org/10.1056/NEJMoa1707358>
595. Wick, W., Krendyukov, A., Junge, K., Höger, T., & Fricke, H. (2019). Longitudinal analysis of quality of life following treatment with Asunercept plus reirradiation versus reirradiation in progressive glioblastoma patients. *Journal of Neuro-oncology*, 145(3), 531-540.
596. Wick, W., Puduvalli, V. K., Chamberlain, M. C., Van Den Bent, M. J., Carpentier, A. F., Cher, L. M., ... Fine, H. A. (2010). Phase III study of enzastaurin compared with lomustine in the treatment of recurrent intracranial glioblastoma. *Journal of Clinical Oncology*, 28(7), 1168–1174. <https://doi.org/10.1200/JCO.2009.23.2595>
597. Willems, P. W. A., Taphoorn, M. J. B., Berkelbach Van Der Sprenkel, W., & Tulleken, C. A. F. (2006). Effectiveness of neuronavigation in resecting solitary intracerebral contrast-enhancing tumors: a randomized controlled trial. *Journal of neurosurgery*, 104(3), 360-368.
598. Wirsching, H. G., Morel, C., Roth, P., & Weller, M. (2020). Socioeconomic burden and quality of life in meningioma patients. *Quality of Life Research*, 29, 1801-1808.
599. Wirsching, H. G., Tabatabai, G., Roelcke, U., Hottinger, A. F., Jörger, F., Schmid, A., ... Weller, M. (2018). Bevacizumab plus hypofractionated radiotherapy versus radiotherapy alone in elderly patients with glioblastoma: The randomized, open-label, phase II ARTE trial. *Annals of Oncology*, 29(6), 1423–1430. <https://doi.org/10.1093/annonc/mdy120>
600. Wolf, J., Campos, B., Bruckner, T., Vogt, L., Unterberg, A., & Ahmadi, R. (2016). Evaluation of neuropsychological outcome and “quality of life” after glioma surgery. *Langenbeck’s Archives of Surgery*, 401(4), 541–549. <https://doi.org/10.1007/s00423-016-1403-6>
601. Wong, S. S., Case, L. D., Avis, N. E., Cummings, T. L., Cramer, C. K., & Rapp, S. R. (2019). Cognitive functioning following brain irradiation as part of cancer treatment: Characterizing better cognitive performance. *Psycho-oncology*, 28(11), 2166-2173.
602. Wong, E., Rowbottom, L., Tsao, M., Zhang, L., McDonald, R., Danjoux, C., ... Chow, E. (2017). Prognostic value of pre- and post-treatment health-related quality of life in predicting survival of patients with brain metastases. *CNS Oncology*, 6(2), 119–129. <https://doi.org/10.2217/cns-2016-0020>
603. Wong, E., Zhang, L., Kerba, M., Foro Arnalot, P., Danielson, B., Tsao, M., ... Chow, E. (2015). Minimal clinically important differences in the EORTC QLQ-BN20 in patients with brain metastases. *Supportive Care in Cancer*, 23(9), 2731–2737. <https://doi.org/10.1007/s00520-015-2637-5>
604. Wong, E., Zhang, L., Kerba, M., Foro, P., Danielson, B., Tsao, M., ... & Chow, E. (2015). Analysis of symptom clusters in patients with brain metastases with three different statistical methods. *Journal of Pain Management*, 8(2), 133.
605. Wong, E., Zhang, L., Rowbottom, L., Chiu, N., Chiu, L., McDonald, R., ... Chow, E. (2016). Symptoms and quality of life in patients with brain metastases receiving whole-brain radiation therapy. *Supportive Care in Cancer*, 24(11), 4747–4759. <https://doi.org/10.1007/s00520-016-3326-8>
606. Wong, J., Hird, A., Zhang, L., Tsao, M., Sinclair, E., Barnes, E., ... Chow, E. (2009). Symptoms and Quality of Life in Cancer Patients With Brain Metastases Following Palliative Radiotherapy. *International Journal of Radiation Oncology Biology Physics*, 75(4), 1125–1131. <https://doi.org/10.1016/j.ijrobp.2008.12.013>
607. Wong, P., Leppert, I. R., Roberge, D., Boudam, K., Brown, P. D., Muanza, T., ... & Mihalciou, C. (2016). A pilot study using dynamic contrast enhanced-MRI as a response biomarker of the radioprotective effect of memantine in patients receiving whole brain radiotherapy. *Oncotarget*, 7(32), 50986
608. Yamanaka, R., Morii, K., Sano, M., Homma, J., Yajima, N., Tsukamoto, Y., ... Fujii, Y. (2017). Long-term survivors of primary central nervous system lymphoma. *Japanese Journal of Clinical Oncology*, 47(2), 101–107. <https://doi.org/10.1093/jjco/hyw171>

609. Yavas, C., Zorlu, F., Ozyigit, G., Gurkaynak, M., Yavas, G., Yuce, D., ... Akyol, F. (2012). Prospective assessment of health-related quality of life in patients with low-grade glioma A single-center experience. *Supportive Care in Cancer*, 20(8), 1859–1868. <https://doi.org/10.1007/s00520-011-1288-4>
610. Yavas, C., Zorlu, F., Ozyigit, G., Gurkaynak, M., Yavas, G., Yuce, D., ... Akyol, F. (2012). Health-related quality of life in high-grade glioma patients: A prospective single-center study. *Supportive Care in Cancer*, 20(10), 2315–2325. <https://doi.org/10.1007/s00520-011-1340-4>
611. Yu, H., Schröder, S., Liu, Y., Li, Z., Yang, Y., Chen, Y., & Huang, X. (2013). Hemiparesis after operation of astrocytoma grade II in adults: Effects of acupuncture on sensory-motor behavior and quality of life. *Evidence-Based Complementary and Alternative Medicine*, 2013. <https://doi.org/10.1155/2013/859763>
612. Yung, W. K. A., Prados, M. D., Yaya-Tur, R., Rosenfeld, S. S., Brada, M., Friedman, H. S., ... Levin, V. A. (1999). *Multicenter Phase II Trial of Temozolomide in Patients With Anaplastic Astrocytoma or Anaplastic Oligoastrocytoma at First Relapse*. *J Clin Oncol* (Vol. 17).
613. Yung, W. K. A., Albright, R. E., Olson, J., Fredericks, R., Fink, K., Prados, M. D., ... Levin, V. A. (2000). A phase II study of temozolemid vs. procarbazine in patients with glioblastoma multiforme at first relapse. *British Journal of Cancer*, 83(5), 588–593. <https://doi.org/10.1054/bjoc.2000.1316>
614. Yusuf, M., Ugiliweneza, B., Amsbaugh, M., Boakye, M., Williams, B., Nelson, M., ... Burton, E. (2018). Interim results of a phase II study of hypofractionated radiotherapy with concurrent temozolomide followed by adjuvant temozolomide in patients over 70 years old with newly diagnosed glioblastoma. *Oncology (Switzerland)*, 95(1), 39–42. <https://doi.org/10.1159/000488395>
615. Zamanipoor Najafabadi, A. H., Peeters, M. C. M., Lobatto, D. J., Broekman, M. L. D., Smith, T. R., Biermasz, N. R., ... Dirven, L. (2017). Health-related quality of life of cranial WHO grade I meningioma patients: are current questionnaires relevant? *Acta Neurochirurgica*, 159(11), 2149–2159. <https://doi.org/10.1007/s00701-017-3332-8>
616. Zemmoura, I., Fournier, E., El-Hage, W., Jolly, V., Destrieux, C., & Velut, S. (2015). Hypnosis for awake surgery of low-grade gliomas: Description of the method and psychological assessment. *Neurosurgery*, 78(1), 53–61. <https://doi.org/10.1227/NEU.0000000000000993>
617. Zhan, Y., & Jiang, X. (2018). Concomitant treatment of brain metastases with whole brain radiotherapy and temozolomide protects neurocognitive function and improve quality of life. *Tropical Journal of Pharmaceutical Research*, 17(6), 1209–1213. <https://doi.org/10.4314/tjpr.v17i6.30>
618. Zhong, J., Waldman, A. D., Kandula, S., Eaton, B. R., Prabhu, R. S., Huff, S. B., & Shu, H. K. G. (2020). Outcomes of whole-brain radiation with simultaneous in-field boost (SIB) for the treatment of brain metastases. *Journal of Neuro-Oncology*, 147(1), 117–123.
619. Zhu, J. J., Demireva, P., Kanner, A. A., Pannullo, S., Mehdorn, M., Avgeropoulos, N., ... Benouaich-Amiel, A. (2017). Health-related quality of life, cognitive screening, and functional status in a randomized phase III trial (EF-14) of tumor treating fields with temozolomide compared to temozolomide alone in newly diagnosed glioblastoma. *Journal of Neuro-Oncology*, 135(3), 545–552. <https://doi.org/10.1007/s11060-017-2601-y>
620. Zhu, Y., Fu, L., Jing, W., Guo, D., Kong, L., & Yu, J. (2018). Effectiveness of temozolomide combined with whole brain radiotherapy for non-small cell lung cancer brain metastases. *Thoracic Cancer*, 9(9), 1121–1128. <https://doi.org/10.1111/1759-7714.12795>
621. Zweckberger, K., Hallek, E., Vogt, L., Giese, H., Schick, U., & Unterberg, A. W. (2017). Prospective analysis of neuropsychological deficits following resection of benign skull base meningiomas. In *Journal of Neurosurgery* (Vol. 127, pp. 1242–1248). American Association of Neurological Surgeons. <https://doi.org/10.3171/2016.10.JNS161936>

**Supplementary File 4.** NCT numbers of all included studies on [clinicaltrials.gov](https://clinicaltrials.gov).

|             |             |             |             |
|-------------|-------------|-------------|-------------|
| NCT01303835 | NCT01450826 | NCT04003649 | NCT03323450 |
| NCT02728024 | NCT04175301 | NCT03242824 | NCT02831959 |
| NCT03849430 | NCT01781468 | NCT03915912 | NCT02330562 |
| NCT01821443 | NCT03775330 | NCT01891318 | NCT02953717 |
| NCT03345095 | NCT04129515 | NCT01372774 | NCT02717962 |
| NCT02221986 | NCT03531333 | NCT01705548 | NCT01516983 |
| NCT02481349 | NCT01651078 | NCT02774681 | NCT01414738 |
| NCT03075072 | NCT03548571 | NCT03297788 | NCT01478321 |
| NCT03346655 | NCT03955198 | NCT03769103 | NCT01898130 |
| NCT03247127 | NCT02973256 | NCT01991977 | NCT02893137 |
| NCT02965144 | NCT02120287 | NCT03258021 | NCT03925246 |
| NCT03665545 | NCT03048240 | NCT01754350 | NCT01266031 |
| NCT03948490 | NCT02898012 | NCT03951142 | NCT02360215 |
| NCT02336165 | NCT02393131 | NCT02616393 | NCT03600467 |
| NCT03899857 | NCT03475186 | NCT01772498 | NCT03180502 |
| NCT03363659 | NCT04195139 | NCT04058704 | NCT01164189 |
| NCT02686229 | NCT03501134 | NCT03557372 | NCT04233021 |
| NCT03412812 | NCT02866747 | NCT03818386 | NCT02589522 |
| NCT02303938 | NCT02498951 | NCT03870464 | NCT03741673 |
| NCT02783495 | NCT04164901 | NCT04074096 | NCT01417507 |
| NCT01421316 | NCT02926222 | NCT01956695 | NCT03898908 |
| NCT02824731 | NCT03251027 | NCT02678975 | NCT02179086 |
| NCT04119674 | NCT02820584 | NCT01860638 | NCT03417544 |
| NCT01120639 | NCT01227954 | NCT02978404 | NCT02991456 |
| NCT01872221 | NCT02655744 | NCT02844439 | NCT03340129 |
| NCT02313389 | NCT03189381 | NCT02147028 | NCT02993146 |
| NCT02715297 | NCT02060955 | NCT03881605 | NCT03483012 |
| NCT02490878 | NCT03025893 | NCT03550391 | NCT01582269 |
| NCT03303365 | NCT01399372 | NCT03897491 | NCT02866981 |
| NCT02353000 | NCT01474239 | NCT03526900 | NCT03450850 |
| NCT04116411 | NCT01580969 | NCT03750227 | NCT02521051 |
| NCT04040400 | NCT02685605 | NCT03932981 | NCT02052778 |
| NCT01894633 | NCT03451799 | NCT02162537 | NCT02614794 |
| NCT02344355 | NCT03458312 | NCT04205357 | NCT03528642 |
| NCT03525301 | NCT03184038 | NCT01032200 | NCT04397978 |
| NCT01866449 | NCT00967330 | NCT02869243 | NCT04007185 |
| NCT02137759 | NCT03728465 | NCT03137888 | NCT04358666 |
| NCT01985087 | NCT03995667 | NCT04001725 | NCT04334330 |
| NCT02847559 | NCT01305941 | NCT02915744 | NCT04373785 |
| NCT03232424 | NCT03561896 | NCT03697343 | NCT03955198 |
| NCT04006561 | NCT01480479 | NCT01666600 | NCT04420598 |
| NCT03981016 | NCT03537911 | NCT02209428 | NCT04277403 |
| NCT03861299 | NCT01894061 | NCT02379572 | NCT04164901 |
| NCT04197492 | NCT03775369 | NCT03625141 | NCT04345146 |
| NCT03672721 | NCT03868943 | NCT03243851 | NCT04181684 |
| NCT03508752 | NCT03395587 | NCT03180268 | NCT03868943 |
| NCT03778294 | NCT02978677 | NCT03975959 | NCT04082520 |
| NCT03154801 | NCT03653546 | NCT02208362 | NCT04223999 |
| NCT01843413 | NCT02781792 | NCT01434602 | NCT04205357 |

|             |             |             |             |
|-------------|-------------|-------------|-------------|
| NCT04004975 | NCT03075514 | NCT02726568 | NCT04094077 |
| NCT01464177 | NCT03391362 | NCT03285932 | NCT03450850 |
| NCT01648348 | NCT02276053 | NCT02022384 |             |
| NCT02565433 | NCT03393000 | NCT03866109 |             |
